# Supplementary material for: Ru(ii)-catalyzed C–H alkynylation of ferrocenes with bromoalkynes directed by carboxamide groups
Source: Royal Society of Chemistry journal article supplement (doi:10.1039/d3qo00069a), 2023-01-01
Supplement: d3qo00069a1.pdf [file d3qo00069a1.pdf]

# Supplementary Information

## Ru(II)-Catalyzed C-H Alkynylation of Ferrocenes with Bromoalkynes

### Directed by Carboxamide Groups

Ru-Yuan Zhao,<sup>a</sup> Jing Zhang,<sup>a</sup> Rui-Han Niu,<sup>a</sup> Jin-Heng Li<sup>\*abc</sup> and Bo Sun<sup>\*a</sup>

---

<sup>a</sup> State Key Laboratory Base of Eco-chemical Engineering, College of Chemical Engineering, Qingdao University of Science & Technology, Qingdao 266042, People's Republic of China. E-mail: jhli@hnu.edu.cn, sun0109@qust.edu.cn.

<sup>b</sup> State Key Laboratory of Applied Organic Chemistry, Lanzhou University, Lanzhou 730000, China

<sup>c</sup> School of Chemistry and Chemical Engineering, Henan Normal University, Xinxiang, Henan 453007, China

## List of Contents

**(A) General Information**

**(B) General Procedure of Ru-Catalyzed C-H Alkynylation of Ferrocenes**

**(C) Gram-Scale Reaction**

**(D) Synthetic Utilizations**

**(E) Enantioselective C-H Alkynylation of Ferrocenes**

**(F) References**

**(G) NMR Spectra**

## (A) General Information

$^1\text{H}$  NMR spectra were recorded on 400 MHz or 500 MHz,  $^{13}\text{C}$  NMR spectra were recorded on 101 MHz or 126 MHz by using a Bruker Avance 400M spectrometer. Chemical shifts were reported in parts per million ( $\delta$ ) relative to tetramethylsilane (TMS). All spectra were obtained at ambient temperature. The chemical shifts ( $\delta$ ) were recorded in parts per million (ppm). The coupling constants ( $J$ ) were shown in Hertz (Hz). Chemical shifts in  $\text{CDCl}_3$  were reported the residual  $\text{CHCl}_3$  (7.26 ppm for  $^1\text{H}$  NMR, 77.16 ppm for  $^{13}\text{C}$  NMR).  $^{13}\text{C}$  NMR showed broad signals for most of tert-amides, we didn't make a mark (br). HRMS measurements were performed on an Ultima Global spectrometer with an ESI source. The melting points were recorded on a RY-1 microscopic melting apparatus and uncorrected. The enantiomeric ratio (er) value of the product was determined by high-performance liquid chromatography (HPLC) analysis performed on Shimadzu LC-20AT chromatography. All the reagents were obtained from commercial sources, and used without further purification. Ferrocene carboxamide derivatives **1a-1p** were known compounds in the literature,<sup>[S1-S5]</sup> bromoalkyne compounds **2a-2p** were known compounds in the literature.<sup>[S6-S10]</sup>

## (B) General Procedure of Ru-Catalyzed C-H Alkynylation of Ferrocenes

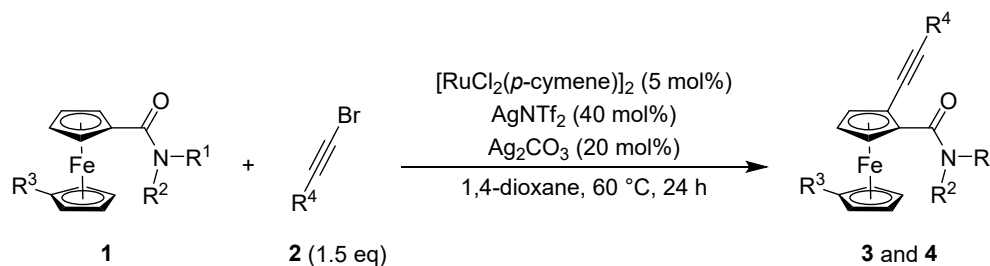

To a dried screw-capped vial, ferrocene carboxamides **1** (0.05 mmol), bromoalkynes compounds **2** (0.075 mmol), [RuCl<sub>2</sub>(*p*-cymene)]<sub>2</sub> (1.51 mg, 0.0025 mmol), AgNTf<sub>2</sub> (8.0 mg, 0.02 mmol), Ag<sub>2</sub>CO<sub>3</sub> (2.75 mg, 0.01 mmol) and 1,4-dioxane (0.125 mL) were added under Ar atmosphere. The vial was capped, and the mixture was heated at 60 °C for 24 h with stirring. The resulting mixture was cooled to room temperature, and directly purified by silica gel column chromatography to give the alkynylated ferrocenecarboxamide products **3** and **4**.

### 2-Triisopropylsilylethynyl-(diethyl-1-carbonyl)ferrocene (**3a**):

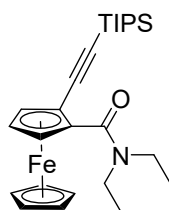

**3a**

Compound **3a** was prepared according to the general procedure. Yellow solid; **m.p.**: 62-64 °C; <sup>1</sup>H NMR (400 MHz, CDCl<sub>3</sub>) δ 4.44-4.40 (m, 2H), 4.35 (s, 5H), 4.20 (s, 1H), 3.60-3.59 (m, 1H), 3.33-3.32 (m, 2H), 3.07-3.06 (m, 1H), 1.20-1.18 (m, 27H); <sup>13</sup>C NMR (101 MHz, CDCl<sub>3</sub>) δ 167.3, 104.2, 89.2, 72.1, 71.5, 71.2, 70.5, 67.6, 64.3, 43.4, 40.3, 18.8, 14.4, 13.3, 11.4; HRMS (ESI): *m/z* calculated for C<sub>26</sub>H<sub>40</sub>FeNOSi<sup>+</sup> [M+H]<sup>+</sup>: 466.2223, found: 466.2172.

### 2-Triisopropylsilylethynyl-(dimethyl-1-carbonyl)ferrocene (**3b**):

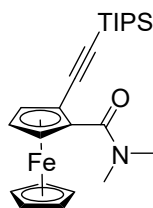

**3b**

Compound **3b** was prepared according to the general procedure. Yellow solid; **m.p.**: 60-62 °C; **<sup>1</sup>H NMR (400 MHz, CDCl<sub>3</sub>)** δ 4.55 (s, 1H), 4.47 (s, 1H), 4.33 (s, 5H), 4.24 (s, 1H), 3.00-2.91 (m, 6H), 1.12 (s, 21H); **<sup>13</sup>C NMR (101 MHz, CDCl<sub>3</sub>)** δ 168.6, 104.3, 89.2, 87.3, 72.1, 71.5, 71.4, 68.0, 63.8, 38.7, 35.4, 18.7, 18.6, 11.2; **HRMS (ESI)**: m/z calculated for C<sub>24</sub>H<sub>36</sub>FeNOSi<sup>+</sup> [M+H]<sup>+</sup>: 438.1910, found: 438.1860.

**2-Triisopropylsilylethynyl-(methyl-ethyl-1-carbonyl)ferrocene (3c):**

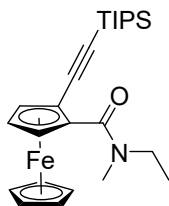

**3c**

Compound **3c** was prepared according to the general procedure. Yellow solid; **m.p.**: 60-62 °C; **<sup>1</sup>H NMR (400 MHz, CDCl<sub>3</sub>)** δ 4.54-4.45 (m, 2H), 4.33 (s, 5H), 4.22 (s, 1H), 3.53-3.41 (m, 2H), 2.96-2.87 (m, 3H), 1.10 (s, 24H); **<sup>13</sup>C NMR (101 MHz, CDCl<sub>3</sub>)** δ 167.9, 104.1, 89.1, 87.7, 72.0, 71.4, 70.6, 67.9, 67.6, 45.6, 42.6, 35.9, 18.7, 13.5, 11.2; **HRMS (ESI)**: m/z calculated for C<sub>25</sub>H<sub>38</sub>FeNOSi<sup>+</sup> [M+H]<sup>+</sup>: 452.2067, found: 452.2008.

**2-Triisopropylsilylethynyl-(diisopropyl-1-carbonyl)ferrocene (3d):**

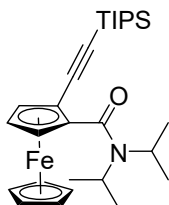

**3d**

Compound **3d** was prepared according to the general procedure. Yellow solid; **m.p.**: 73-75 °C; **<sup>1</sup>H NMR (400 MHz, CDCl<sub>3</sub>)** δ 4.43 (s, 1H), 4.36 (s, 5H), 4.30 (s, 1H), 4.16 (s, 1H), 3.72-3.59 (m, 1H), 3.42-3.35 (m, 1H), 1.50-1.47 (m, 6H), 1.11-1.05 (m, 27H); **<sup>13</sup>C NMR (101 MHz, CDCl<sub>3</sub>)** δ 166.2, 104.1, 92.2, 88.8, 71.8, 70.9, 68.7, 67.0, 64.1, 50.8, 45.7, 20.3, 18.7, 18.7, 11.3; **HRMS (ESI)**: m/z calculated for C<sub>28</sub>H<sub>44</sub>FeNOSi<sup>+</sup> [M+H]<sup>+</sup>: 494.2536, found: 494.2708.

### 2-Triisopropylsilylethynyl-(dibutyl-1-carbonyl)ferrocene (**3e**):

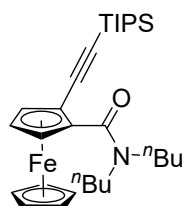

**3e**

Compound **3e** was prepared according to the general procedure. Yellow solid; **m.p.**: 77-79 °C; **<sup>1</sup>H NMR (400 MHz, CDCl<sub>3</sub>)** δ 4.45-4.44 (m, 2H), 4.34 (s, 5H), 4.19 (s, 1H), 3.62-2.95 (m, 4H), 1.64-1.36 (m, 8H), 1.12-1.11(m, 21H), 0.96-0.93 (m, 3H), 0.74-0.70 (m, 3H); **<sup>13</sup>C NMR (101 MHz, CDCl<sub>3</sub>)** δ 167.5, 104.2, 89.1, 88.9, 72.0, 71.2, 70.8, 67.5, 64.2, 48.7, 45.8, 30.8, 30.1, 20.5, 19.7, 18.7, 18.7, 14.0, 13.6, 11.2; **HRMS (ESI)**: m/z calculated for C<sub>30</sub>H<sub>48</sub>FeNOSi<sup>+</sup> [M+H]<sup>+</sup>: 522.2849, found: 522.2851.

### 2-Triisopropylsilylethynyl-(diisobutyl-1-carbonyl)ferrocene (**3f**):

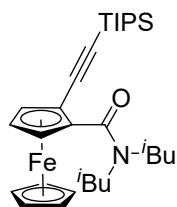

**3f**

Compound **3f** was prepared according to the general procedure. Yellow solid; **m.p.**: 77-79 °C; **<sup>1</sup>H NMR (400 MHz, CDCl<sub>3</sub>)** δ 4.51-4.46 (m, 2H), 4.30 (s, 5H), 4.22 (s, 1H), 3.76-3.71 (m, 1H), 3.33-3.27 (m, 1H), 2.99-2.95 (m, 1H), 2.82-2.77 (m, 1H),

2.07-2.04 (m, 1H), 1.77-1.70 (m, 1H), 1.11 (s, 21H), 0.97 (s, 6H), 0.71-0.57 (m, 6H);  $^{13}\text{C}$  NMR (101 MHz,  $\text{CDCl}_3$ )  $\delta$  168.6, 104.7, 89.5, 87.1, 72.4, 72.2, 67.9, 64.0, 56.6, 52.5, 27.1, 26.5, 20.6, 20.4, 20.1, 19.7, 18.7, 18.7, 11.2; HRMS (ESI):  $m/z$  calculated for  $\text{C}_{30}\text{H}_{48}\text{FeNOSi}^+ [\text{M}+\text{H}]^+$ : 522.2849, found: 522.2850.

### 2-Triisopropylsilylethynyl-(methyl-benzyl-1-carbonyl)ferrocene (3g):

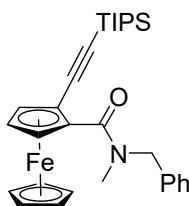

**3g**

Compound **3g** was prepared according to the general procedure. Yellow solid; **m.p.**: 68-70 °C;  $^1\text{H}$  NMR (400 MHz,  $\text{CDCl}_3$ )  $\delta$  7.32-7.26 (m, 5H), 5.01-4.75 (m, 1H), 4.58-4.56 (m, 1H), 4.49 (s, 1H), 4.36 (s, 5H), 4.26-4.22 (m, 2H), 2.86 (s, 3H), 1.14 (s, 21H);  $^{13}\text{C}$  NMR (101 MHz,  $\text{CDCl}_3$ )  $\delta$  168.7, 137.2, 128.8, 128.5, 128.2, 127.2, 104.1, 89.5, 86.7, 72.1, 71.8, 71.3, 68.1, 55.0, 51.2, 36.1, 33.2, 18.7, 11.2; HRMS (ESI):  $m/z$  calculated for  $\text{C}_{30}\text{H}_{40}\text{FeNOSi}^+ [\text{M}+\text{H}]^+$ : 514.2223, found: 514.2206.

### 2-Triisopropylsilylethynyl-(dibenzyl-1-carbonyl)ferrocene (3h):

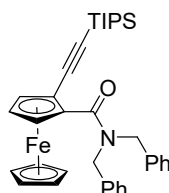

**3h**

Compound **3h** was prepared according to the general procedure. Yellow solid; **m.p.**: 75-77 °C;  $^1\text{H}$  NMR (400 MHz,  $\text{CDCl}_3$ )  $\delta$  7.29-7.26 (m, 8H), 7.04-7.03 (m, 2H), 5.05 (d,  $J = 14.7$  Hz, 1H), 4.73 (d,  $J = 15.9$  Hz, 1H), 4.52-4.51 (m, 2H), 4.37 (s, 5H), 4.28 (d,  $J = 16.0$  Hz, 1H), 4.21 (t,  $J = 2.3$  Hz, 1H), 4.16 (d,  $J = 14.5$  Hz, 1H), 1.14-1.12 (m, 21H);  $^{13}\text{C}$  NMR (101 MHz,  $\text{CDCl}_3$ )  $\delta$  168.8, 137.2, 128.6, 128.3, 127.3, 104.1, 89.9, 85.5, 72.5, 72.2, 70.9, 68.2, 65.6, 51.7, 47.7, 18.8, 18.7, 11.3; HRMS (ESI):  $m/z$  calculated for  $\text{C}_{36}\text{H}_{44}\text{FeNOSi}^+ [\text{M}+\text{H}]^+$ : 590.2536, found: 590.2532.

### 2-Triisopropylsilylethynyl-(pyrrolidine-1-carbonyl)ferrocene (**3i**):

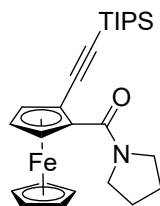

**3i**

Compound **3i** was prepared according to the general procedure. Yellow solid; **m.p.**: 59-61 °C; **<sup>1</sup>H NMR (400 MHz, CDCl<sub>3</sub>)** δ 4.55 (s, 1H), 4.47 (s, 1H), 4.33 (s, 5H), 4.22 (t, *J* = 2.3 Hz, 1H), 3.73-3.46 (m, 3H), 3.14-3.08 (m, 1H), 1.89-1.74 (m, 4H), 1.12-1.11 (m, 21H); **<sup>13</sup>C NMR (101 MHz, CDCl<sub>3</sub>)** δ 167.4, 104.9, 89.4, 88.5, 72.3, 72.0, 71.4, 68.3, 63.6, 48.1, 46.3, 26.2, 24.8, 18.9, 18.9, 11.5; **HRMS (ESI)**: *m/z* calculated for C<sub>26</sub>H<sub>38</sub>FeNOSi<sup>+</sup> [M+H]<sup>+</sup>: 464.2067, found: 464.2069.

### 2-Triisopropylsilylethynyl-(piperidine-1-carbonyl)ferrocene (**3j**):

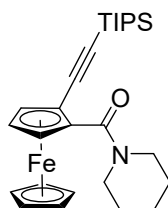

**3j**

Compound **3j** was prepared according to the general procedure. Yellow solid; **m.p.**: 60-62 °C; **<sup>1</sup>H NMR (400 MHz, CDCl<sub>3</sub>)** δ 4.49-4.46 (m, 2H), 4.33 (s, 5H), 4.23 (t, *J* = 2.0 Hz, 1H), 3.87-3.84 (m, 1H), 3.32-3.28 (m, 3H), 1.63-1.56 (m, 6H), 1.13-1.12 (m, 21H); **<sup>13</sup>C NMR (101 MHz, CDCl<sub>3</sub>)** δ 166.8, 104.2, 89.2, 87.7, 72.0, 71.4, 71.2, 67.8, 64.0, 24.6, 18.7, 11.2; **HRMS (ESI)**: *m/z* calculated for C<sub>27</sub>H<sub>40</sub>FeNOSi<sup>+</sup> [M+H]<sup>+</sup>: 478.2223, found: 478.2183.

### 2-Triisopropylsilylethynyl-(morpholine-1-carbonyl)ferrocene (**3k**):

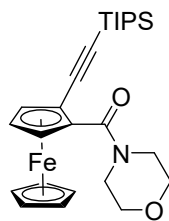

**3k**

Compound **3k** was prepared according to the general procedure. Yellow solid; **m.p.**: 95-97 °C; **<sup>1</sup>H NMR (400 MHz, CDCl<sub>3</sub>)** δ 4.54 (s, 1H), 4.49 (s, 1H), 4.33 (s, 5H), 4.26 (s, 1H), 3.74-3.31 (m, 8H), 1.12 (s, 21H); **<sup>13</sup>C NMR (101 MHz, CDCl<sub>3</sub>)** δ 167.4, 104.0, 89.7, 85.9, 72.1, 71.9, 71.7, 68.2, 63.9, 18.7, 11.2; **HRMS (ESI):** m/z calculated for C<sub>26</sub>H<sub>38</sub>FeNO<sub>2</sub>Si<sup>+</sup> [M+H]<sup>+</sup>: 480.2016, found: 480.2011.

**2-Triisopropylsilylethynyl-(N-phenylpiperazine-1-carbonyl)ferrocene (3l):**

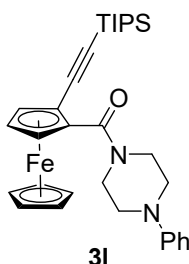

**3l**

Compound **3l** was prepared according to the general procedure. Yellow solid; **m.p.**: 108-110 °C; **<sup>1</sup>H NMR (400 MHz, CDCl<sub>3</sub>)** δ 7.30-7.26 (m, 2H), 6.92-6.90 (m, 3H), 4.58 (s, 1H), 4.53 (s, 1H), 4.38 (s, 5H), 4.30 (t, *J* = 2.4 Hz, 1H), 3.62-3.58 (m, 4H), 3.23-3.20 (m, 4H), 1.28-1.13 (m, 21H); **<sup>13</sup>C NMR (101 MHz, CDCl<sub>3</sub>)** δ 167.2, 151.0, 129.1, 120.2, 116.5, 104.0, 89.7, 86.3, 72.1, 71.8, 71.6, 68.2, 64.0, 18.7, 11.2; **HRMS (ESI):** m/z calculated for C<sub>32</sub>H<sub>43</sub>FeN<sub>2</sub>OSi<sup>+</sup> [M+H]<sup>+</sup>: 555.2489, found: 555.2495.

**2-Triisopropylsilylethynyl-((4-piperidine-1-carbonyl)ferrocene (3m):**

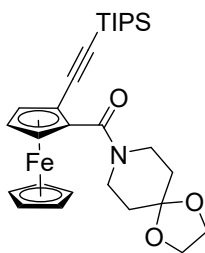

**3m**



Compound **3m** was prepared according to the general procedure. Yellow solid; **m.p.**: 81-83 °C; **<sup>1</sup>H NMR (400 MHz, CDCl<sub>3</sub>)** δ 4.51-4.47 (m, 2H), 4.33 (s, 5H), 4.24 (t, *J* = 2.2 Hz, 1H), 3.93 (s, 4H), 3.37-3.51 (m, 4H), 1.77-1.58 (m, 4H), 1.12 (s, 21H); **<sup>13</sup>C NMR (101 MHz, CDCl<sub>3</sub>)** δ 167.1, 107.1, 104.0, 89.5, 86.8, 72.1, 71.6, 71.3, 68.0, 64.3, 64.1, 40.4, 34.5, 18.7, 11.2; **HRMS (ESI)**: *m/z* calculated for C<sub>29</sub>H<sub>42</sub>FeNO<sub>3</sub>Si<sup>+</sup> [M+H]<sup>+</sup>: 536.2278, found: 536.2272.

### 2-Triisopropylsilylethynyl-(azepane-1-carbonyl)ferrocene (**3n**):

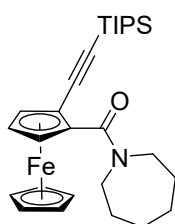

**3n**

Compound **3n** was prepared according to the general procedure. Yellow solid; **m.p.**: 79-81 °C; **<sup>1</sup>H NMR (400 MHz, CDCl<sub>3</sub>)** δ 4.46-4.44 (m, 2H), 4.34 (s, 5H), 4.20 (s, 1H), 3.90-3.87 (m, 1H), 3.43-3.39 (m, 1H), 3.24-3.19 (m, 2H), 1.83-1.72 (m, 3H), 1.61-1.52 (m, 3H), 1.42-1.34 (m, 2H), 1.10 (s, 21H); **<sup>13</sup>C NMR (101 MHz, CDCl<sub>3</sub>)** δ 167.9, 104.2, 89.1, 72.0, 70.9, 70.6, 67.5, 64.1, 49.3, 46.5, 29.1, 27.8, 27.1, 26.3, 18.7, 11.2; **HRMS (ESI)**: *m/z* calculated for C<sub>28</sub>H<sub>42</sub>FeNOSi<sup>+</sup> [M+H]<sup>+</sup>: 492.2380, found: 492.2382.

### 2-Triisopropylsilylethynyl-(dimethyl-1-carbonyl)-1'-isopropyl-ferrocene (**3o**):

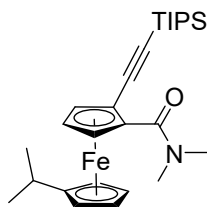

**3o**

Compound **3o** was prepared according to the general procedure. Yellow oil; **<sup>1</sup>H NMR (400 MHz, CDCl<sub>3</sub>)** δ 4.49 (s, 1H), 4.37 (s, 1H), 4.30 (s, 1H), 4.25 (s, 1H), 4.23-4.18

(m, 2H), 4.16 (s, 1H), 2.98-2.90 (m, 6H), 2.77-2.70 (m, 1H), 1.17-1.16 (m, 6H), 1.10 (s, 21H);  $^{13}\text{C}$  NMR (101 MHz,  $\text{CDCl}_3$ )  $\delta$  168.9, 104.3, 98.7, 89.4, 87.0, 72.6, 72.2, 71.9, 71.7, 70.8, 68.9, 68.5, 64.1, 38.8, 35.5, 26.6, 23.6, 23.5, 18.7, 11.9. **HRMS (ESI)**:  $m/z$  calculated for  $\text{C}_{27}\text{H}_{42}\text{FeNOSi}^+ [\text{M}+\text{H}]^+$ : 480.2380, found: 480.2382.

### 2-Triisopropylsilylethynyl-(diethyl-1-carbonyl)-1'-ispropyl-ferrocene (3p):

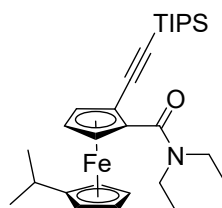

**3p**

Compound **3p** was prepared according to the general procedure. Yellow oil;  $^1\text{H}$  NMR (400 MHz,  $\text{CDCl}_3$ )  $\delta$  4.40 (s, 1H), 4.38-4.35 (s, 2H), 4.28 (s, 1H), 4.23-4.21 (m, 2H), 4.17-4.16 (m, 1H), 3.64-3.04 (m, 4H), 2.74 (dt,  $J = 13.7, 6.8$  Hz, 1H), 1.18-1.16 (m, 12H), 1.11-1.10 (m, 21H);  $^{13}\text{C}$  NMR (101 MHz,  $\text{CDCl}_3$ )  $\delta$  167.3, 104.0, 98.6, 89.3, 88.6, 72.5, 71.9, 71.4, 70.9, 70.6, 68.5, 68.0, 64.6, 43.2, 40.1, 29.7, 26.6, 23.6, 18.7, 14.3, 13.2, 11.3; **HRMS (ESI)**:  $m/z$  calculated for  $\text{C}_{29}\text{H}_{46}\text{FeNOSi}^+ [\text{M}+\text{H}]^+$ : 508.2693, found: 508.2689.

### 2-Triethylsilylethynyl-(diethyl-1-carbonyl)ferrocene (4a):

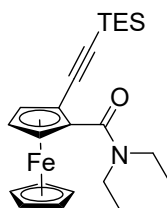

**4a**

Compound **4a** was prepared according to the general procedure. Yellow solid; **m.p.**: 60-62 °C;  $^1\text{H}$  NMR (400 MHz,  $\text{CDCl}_3$ )  $\delta$  4.45-4.43 (m, 2H), 4.33 (s, 5H), 4.20 (t,  $J = 2.3$  Hz, 1H), 3.68-3.65 (m, 1H), 3.29-3.07 (m, 3H), 1.04-1.00 (m, 9H), 0.65-0.59 (m, 6H);  $^{13}\text{C}$  NMR (101 MHz,  $\text{CDCl}_3$ )  $\delta$  167.2, 103.5, 90.4, 89.0, 72.1, 70.9, 70.5, 67.6,

64.0, 43.1, 39.8, 14.2, 13.0, 7.6, 4.5; **HRMS (ESI):** m/z calculated for  $C_{23}H_{34}FeNOSi^+$   $[M+H]^+$ : 424.1754, found: 424.1750.

**2-tert-butylsilyl-ethynyl-(diethyl-1-carbonyl)ferrocene (4b):**

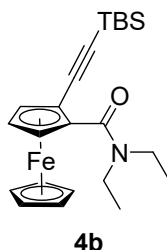

Compound **4b** was prepared according to the general procedure. Yellow solid; **m.p.:** 60-62 °C;  **$^1H$  NMR (400 MHz,  $CDCl_3$ )**  $\delta$  4.45-4.43 (m, 2H), 4.34 (s, 5H), 4.20 (s, 1H), 3.65-3.08 (m, 4H), 1.25-1.10 (m, 6H), 0.97 (s, 9H), 0.14-0.12 (m, 6H);  **$^{13}C$  NMR (101 MHz,  $CDCl_3$ )**  $\delta$  167.1, 102.9, 91.3, 89.0, 72.0, 70.9, 70.4, 67.5, 63.9, 43.1, 39.8, 26.1, 18.7, 16.5, 14.2, 13.1; **HRMS (ESI):** m/z calculated for  $C_{23}H_{34}FeNOSi^+$   $[M+H]^+$ : 424.1754, found: 424.1748.

**2-phenylethynyl-(diethyl-1-carbonyl)ferrocene (4c):**

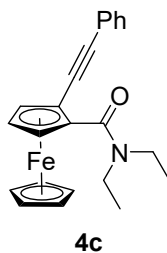

Compound **4c** was prepared according to the general procedure. Yellow solid; **m.p.:** 104-106 °C;  **$^1H$  NMR (400 MHz,  $CDCl_3$ )**  $\delta$  7.46-7.44 (m, 2H), 7.32-7.31 (m, 3H), 4.52 (s, 2H), 4.39 (s, 5H), 4.28 (s, 1H), 3.76-3.72 (m, 1H), 3.30-3.19 (m, 3H), 1.25 (s, 6H);  **$^{13}C$  NMR (101 MHz,  $CDCl_3$ )**  $\delta$  167.3, 131.3, 128.3, 127.8, 123.7, 88.2, 88.0, 86.7, 71.9, 70.5, 70.3, 67.7, 64.6, 42.9, 39.6, 14.2, 13.0; **HRMS (ESI):** m/z calculated for  $C_{23}H_{24}FeNO^+$   $[M+H]^+$ : 386.1202, found: 386.1208.

**2-(2-chlorophenyl)ethynyl-(diethyl-1-carbonyl)ferrocene (4d):**

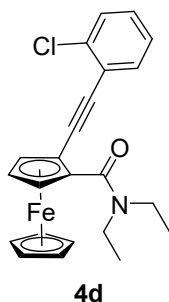

Compound **4d** was prepared according to the general procedure. Yellow solid; **m.p.**: 115-117 °C; **<sup>1</sup>H NMR (400 MHz, CDCl<sub>3</sub>)** δ 7.48 (d, *J* = 6.3 Hz, 1H), 7.40 (d, *J* = 7.0 Hz, 1H), 7.39-7.20 (m, 2H), 4.55 (s, 2H), 4.41 (s, 5H), 4.30 (s, 1H), 3.67-3.65 (m, 1H), 3.34-3.20 (m, 3H), 1.25-1.20 (m, 6H); **<sup>13</sup>C NMR (101 MHz, CDCl<sub>3</sub>)** δ 167.2, 135.4, 1330, 129.2, 128.7, 126.4, 123.6, 92.3, 88.4, 84.5, 72.0, 70.9, 70.6, 68.0, 63.9, 39.8, 29.7, 14.2, 13.0; **HRMS (ESI)**: *m/z* calculated for C<sub>23</sub>H<sub>23</sub>ClFeNO<sup>+</sup> [M+H]<sup>+</sup>: 420.0812, found: 420.0805.

**2-(*m*-tolylethynyl)ethynyl-(diethyl-1-carbonyl)ferrocene (4e):**

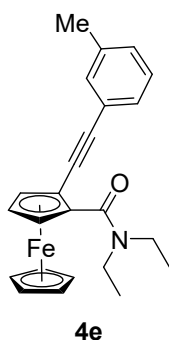

Compound **4e** was prepared according to the general procedure. Yellow solid; **m.p.**: 109-111 °C; **<sup>1</sup>H NMR (400 MHz, CDCl<sub>3</sub>)** δ 7.30-7.28 (m, 2H), 7.22 (t, *J* = 7.5 Hz, 1H), 7.13 (d, *J* = 7.3 Hz, 1H), 4.52 (s, 2H), 4.41 (s, 5H), 4.29 (s, 1H), 3.77-3.75 (m, 1H), 3.31-3.21 (m, 3H), 2.36 (s, 3H), 1.24-1.03 (m, 6H); **<sup>13</sup>C NMR (101 MHz, CDCl<sub>3</sub>)** δ 167.4, 138.0, 131.9, 128.7, 128.3, 128.2, 123.5, 88.2, 88.1, 86.3, 71.9, 70.5, 70.2, 67.7, 64.7, 39.6, 29.7, 21.2, 14.1, 13.0; **HRMS (ESI)**: *m/z* calculated for C<sub>24</sub>H<sub>26</sub>FeNO<sup>+</sup> [M+H]<sup>+</sup>: 400.1358, found: 400.1350.

**2-(3-methoxyphenyl)ethynyl-(diethyl-1-carbonyl)ferrocene (4f):**

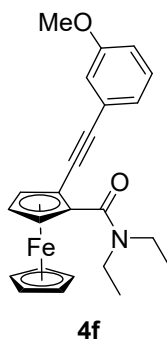

Compound **4f** was prepared according to the general procedure. Yellow solid; **m.p.**: 108-110 °C; **<sup>1</sup>H NMR (400 MHz, CDCl<sub>3</sub>)** δ 7.22-7.20 (m, 1H), 7.05-6.97 (m, 2H), 6.87 (d, *J* = 6.6 Hz, 1H), 4.52-4.28 (m, 8H), 3.81-3.70 (m, 4H), 3.28-3.19 (m, 3H), 1.25-1.23 (m, 6H); **<sup>13</sup>C NMR (101 MHz, CDCl<sub>3</sub>)** δ 167.4, 159.3, 129.3, 124.7, 123.9, 116.0, 114.4, 88.2, 87.9, 86.6, 71.9, 70.5, 70.3, 67.7, 64.5, 55.3, 43.0, 39.6, 14.1, 13.1; **HRMS (ESI)**: *m/z* calculated for C<sub>24</sub>H<sub>26</sub>FeNO<sub>2</sub><sup>+</sup> [M+H]<sup>+</sup>: 416.1307, found: 416.1301.

**2-(4-chlorophenyl)ethynyl-(diethyl-1-carbonyl)ferrocene (4g):**

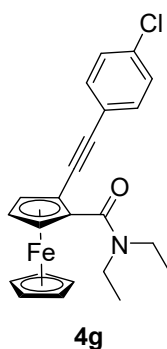

Compound **4g** was prepared according to the general procedure. Yellow solid; **m.p.**: 117-119 °C; **<sup>1</sup>H NMR (400 MHz, CDCl<sub>3</sub>)** δ 7.38-7.36 (m, 2H), 7.29-7.27 (m, 2H), 4.51-4.50 (m, 2H), 4.39 (s, 5H), 4.28 (t, *J* = 2.4 Hz, 1H), 3.73-3.69 (m, 1H), 3.28-3.17 (m, 3H), 1.25-1.20 (m, 6H); **<sup>13</sup>C NMR (101 MHz, CDCl<sub>3</sub>)** δ 167.2, 133.7, 132.5, 128.6, 122.2, 88.2, 87.9, 86.8, 71.9, 70.6, 70.1, 67.8, 64.4, 39.6, 14.1; **HRMS (ESI)**: *m/z* calculated for C<sub>23</sub>H<sub>23</sub>ClFeNO<sup>+</sup> [M+H]<sup>+</sup>: 420.0812, found: 420.0808.

**2-(4-bromophenyl)ethynyl-(diethyl-1-carbonyl)ferrocene (4h):**

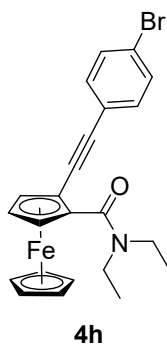

Compound **4h** was prepared according to the general procedure. Yellow solid; **m.p.:** 115-117 °C; **<sup>1</sup>H NMR (400 MHz, CDCl<sub>3</sub>)** δ 7.45-7.43 (m, 2H), 7.31-7.29 (m, 2H), 4.51-4.50 (m, 2H), 4.38 (s, 5H), 4.28 (s, 1H), 3.73-3.71 (m, 1H), 3.28-3.18 (m, 3H), 1.25-1.20 (m, 6H); **<sup>13</sup>C NMR (101 MHz, CDCl<sub>3</sub>)** δ 167.2, 132.7, 131.5, 122.7, 121.8, 88.2, 88.1, 86.9, 71.9, 70.6, 70.1, 67.8, 64.4, 39.6, 29.7, 14.2, 13.0; **HRMS (ESI):** m/z calculated for C<sub>23</sub>H<sub>23</sub>BrFeNO<sup>+</sup> [M+H]<sup>+</sup>: 464.0307, found: 464.0301.

**2-(4-cyanophenyl)ethynyl-(diethyl-1-carbonyl)ferrocene (4i):**

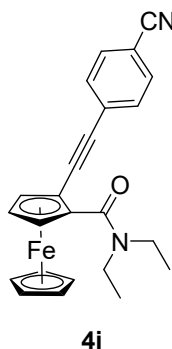

Compound **4i** was prepared according to the general procedure. Yellow solid; **m.p.:** 110-112 °C; **<sup>1</sup>H NMR (400 MHz, CDCl<sub>3</sub>)** δ 7.60-7.58 (m, 2H), 7.51-7.49 (m, 2H), 4.54 (s, 2H), 4.39 (s, 5H), 4.33 (s, 1H), 3.73-3.70 (m, 1H), 3.29-3.17 (m, 3H), 1.25-1.21 (m, 6H); **<sup>13</sup>C NMR (101 MHz, CDCl<sub>3</sub>)** δ 167.0, 132.0, 131.6, 128.7, 118.7, 110.7, 92.3, 88.3, 86.5, 72.0, 70.9, 70.3, 69.7, 68.3, 63.7, 43.0, 39.7, 14.3, 13.0; **HRMS (ESI):** m/z calculated for C<sub>24</sub>H<sub>23</sub>FeN<sub>2</sub>O<sup>+</sup> [M+H]<sup>+</sup>: 411.1154, found: 411.1142.

**2-(4-nitrophenyl)ethynyl-(diethyl-1-carbonyl)ferrocene (4j):**

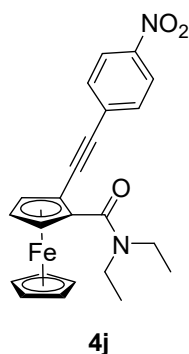

Compound **4j** was prepared according to the general procedure. Yellow solid; **m.p.:** 107-109 °C; **<sup>1</sup>H NMR (400 MHz, CDCl<sub>3</sub>)** δ 8.28-8.27 (m, 1H), 8.16-8.13 (m, 1H), 7.76 (d, *J* = 7.7 Hz, 1H), 7.51 (t, *J* = 8.0 Hz, 1H), 4.57-4.54 (m, 2H), 4.41 (s, 5H), 4.35 (t, *J* = 2.5 Hz, 1H), 3.73-3.71 (m, 1H), 3.30-3.21 (m, 3H), 1.25-1.23 (m, 6H); **<sup>13</sup>C NMR (101 MHz, CDCl<sub>3</sub>)** δ 167.0, 148.1, 136.9, 129.3, 126.0, 125.6, 122.3, 90.1, 88.7, 85.6, 72.0, 70.9, 70.2, 68.2, 63.7, 43.0, 39.1, 14.2, 13.1; **HRMS (ESI):** *m/z* calculated for C<sub>23</sub>H<sub>23</sub>FeN<sub>2</sub>O<sub>3</sub><sup>+</sup> [M+H]<sup>+</sup>: 431.1053, found: 431.1059.

**2-(4-formylphenyl)ethynyl-(diethyl-1-carbonyl)ferrocene (4k):**

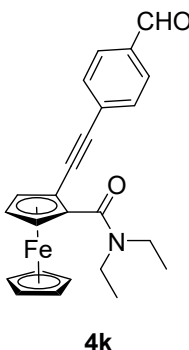

Compound **4k** was prepared according to the general procedure. Yellow solid; **m.p.:** 97-99 °C; **<sup>1</sup>H NMR (400 MHz, CDCl<sub>3</sub>)** δ 10.00 (s, 1H), 7.84-7.82 (m, 2H), 7.59-7.57 (m, 2H), 4.55-4.54 (m, 2H), 4.40 (s, 5H), 4.33 (s, 1H), 3.76-3.71 (m, 1H), 3.29-3.20 (m, 3H), 1.25-1.23 (m, 6H); **<sup>13</sup>C NMR (101 MHz, CDCl<sub>3</sub>)** δ 191.4, 167.1, 134.9, 131.7, 130.1, 129.6, 91.9, 88.4, 87.4, 72.0, 70.9, 70.4, 68.2, 63.9, 43.1, 39.7, 14.2, 13.1; **HRMS (ESI):** *m/z* calculated for C<sub>24</sub>H<sub>24</sub>FeNO<sub>2</sub><sup>+</sup> [M+H]<sup>+</sup>: 414.1151, found: 414.1144.

**2-(4-acetylphenyl)ethynyl-(diethyl-1-carbonyl)ferrocene (4l):**

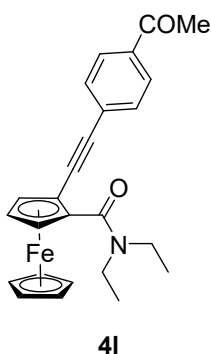

Compound **4l** was prepared according to the general procedure. Yellow solid; **m.p.**: 98-100 °C; **<sup>1</sup>H NMR (400 MHz, CDCl<sub>3</sub>)** δ 7.91-7.89 (m, 2H), 7.52-7.50 (m, 2H), 4.54-4.53 (m, 2H), 4.40 (s, 5H), 4.32 (t, *J* = 2.4 Hz, 1H), 3.75-3.73 (m, 1H), 3.29-3.19 (m, 3H), 2.60 (s, 3H), 1.25-1.21 (m, 6H); **<sup>13</sup>C NMR (101 MHz, CDCl<sub>3</sub>)** δ 197.3, 167.1, 135.6, 131.3, 128.7, 128.3, 90.9, 88.4, 87.4, 72.0, 70.8, 70.3, 68.1, 64.0, 43.0, 39.6, 26.6, 14.2, 13.0; **HRMS (ESI)**: *m/z* calculated for C<sub>25</sub>H<sub>26</sub>FeNO<sub>2</sub><sup>+</sup> [M+H]<sup>+</sup>: 428.1307, found: 428.1295.

**2-(4-methyl benzoate)ethynyl-(diethyl-1-carbonyl)ferrocene (4m):**

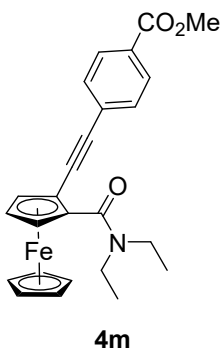

Compound **4m** was prepared according to the general procedure. Yellow solid; **m.p.**: 103-105 °C; **<sup>1</sup>H NMR (400 MHz, CDCl<sub>3</sub>)** δ 7.99-7.97 (m, 2H), 7.50-7.48 (m, 2H), 4.54-4.53 (m, 2H), 4.40 (s, 5H), 4.31 (t, *J* = 2.3 Hz, 1H), 3.92 (s, 3H), 3.75-3.72 (m, 1H), 3.28-3.18 (m, 3H), 1.25-1.22 (m, 6H); **<sup>13</sup>C NMR (101 MHz, CDCl<sub>3</sub>)** δ 167.1, 166.6, 131.1, 129.5, 128.9, 128.5, 90.4, 88.4, 87.4, 72.0, 70.8, 70.3, 68.1, 68.0, 64.1, 52.2, 39.7, 38.7, 14.0, 13.1; **HRMS (ESI)**: *m/z* calculated for C<sub>25</sub>H<sub>26</sub>FeNO<sub>3</sub><sup>+</sup> [M+H]<sup>+</sup>: 444.1257, found: 444.1249.



**2-(naphthalen-2-ylethynyl)-(diethyl-1-carbonyl)ferrocene (4n):**

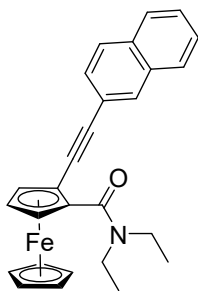

**4n**

Compound **4n** was prepared according to the general procedure. Yellow solid; **m.p.:** 94-96 °C; **<sup>1</sup>H NMR (400 MHz, CDCl<sub>3</sub>)** δ 7.97 (s, 1H), 7.82-7.77 (m, 3H), 7.51-7.47 (m, 3H), 4.56-4.54 (m, 2H), 4.42 (s, 5H), 4.30 (t, *J* = 2.4 Hz, 1H), 3.81-3.75 (m, 1H), 3.32-3.22 (m, 3H), 1.25 (s, 6H); **<sup>13</sup>C NMR (101 MHz, CDCl<sub>3</sub>)** δ 167.4, 133.0, 132.5, 130.9, 128.3, 128.0, 127.8, 127.6, 126.5, 126.4, 121.0, 88.4, 88.3, 87.2, 71.9, 70.6, 70.2, 67.7, 64.7, 43.1, 39.6, 14.1, 13.1; **HRMS (ESI):** *m/z* calculated for C<sub>27</sub>H<sub>26</sub>FeNO<sup>+</sup> [M+H]<sup>+</sup>: 436.1358, found: 436.1351.

**2-((1-((tert-butyldimethylsilyl)oxy)cyclohexyl)ethynyl)-(diethyl-1-carbonyl)ferrocene (4o):**

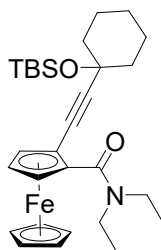

**4o**

Compound **4o** was prepared according to the general procedure. Yellow oil; **<sup>1</sup>H NMR (500 MHz, CDCl<sub>3</sub>)** δ 4.45 (s, 1H), 4.39 (s, 1H), 4.34 (s, 5H), 4.20 (s, 1H), 3.71-3.70 (m, 1H), 3.26-3.13 (m, 3H), 2.16-2.01 (m, 5H), 1.65-1.59 (m, 7H), 1.45-1.19 (m, 12H), 1.04-0.98 (m, 4H), 0.93-0.91 (m, 3H); **<sup>13</sup>C NMR (126 MHz, CDCl<sub>3</sub>)** δ 167.8, 89.9, 88.1, 83.6, 71.8, 70.4, 70.0, 68.2, 67.4, 65.5, 43.0, 39.5, 38.8, 30.4, 29.4, 29.0, 25.7, 23.8, 23.0, 22.4, 21.6, 14.1, 13.0; **HRMS (ESI):** *m/z* calculated for C<sub>29</sub>H<sub>43</sub>FeNNaO<sub>2</sub>Si [M+Na]<sup>+</sup>: 544.2305, found: 544.2304.

### (C) Gram-Scale Reaction

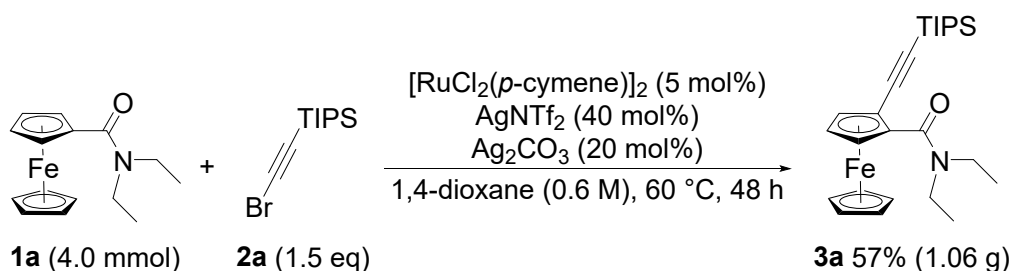

To a dried screw-capped vial, **1a** (4.0 mmol), **2a** (6.0 mmol),  $[\text{RuCl}_2(p\text{-cymene})]_2$  (120.8 mg, 0.2 mmol),  $\text{AgNTf}_2$  (640.0 mg, 1.6 mmol),  $\text{Ag}_2\text{CO}_3$  (220.0 mg, 0.8 mmol) and 1,4-dioxane (6.7 mL) were added under Ar atmosphere. The vial was capped, and the mixture was heated at 60 °C for 48 h with stirring. The resulting mixture was cooled to room temperature, and directly purified by silica gel column chromatography to give the desired products **3a** in 57% yield (1.06 g).

### (D) Synthetic Utilizations

#### (a) 2-Ethynyl-(diethyl-1-carbonyl)ferrocene (**5**):

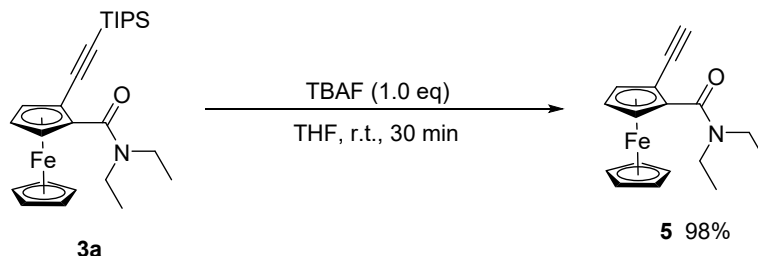

Reaction was carried out in an oven-dried flask under an argon atmosphere. To a solution of **3a** (93.1 mg, 0.2 mmol, 1.0 eq) in THF (6 mL) was added TBAF (1 M in THF, 200  $\mu\text{L}$ , 0.20 mmol, 1.0 eq) dropwise at r.t., and the reaction was stirred for 30 min. Saturated  $\text{NH}_4\text{Cl}$  (10 mL) was then added, and the mixture was extracted with EA (10 mL $\times$ 2). The combined organic layer was washed with brine, dried over anhydrous  $\text{Na}_2\text{SO}_4$ , and concentrated under reduced pressure. The residue was purified by column chromatography on silica gel (hexane/ethyl acetate, 10:1) to afford **5** as a yellow solid (60.6 mg, 98% yield); **m.p.**: 97-99 °C;  $^1\text{H NMR}$  (400 MHz,  $\text{CDCl}_3$ )  $\delta$  4.48-4.43 (m, 2H), 4.35 (s, 5H), 4.22 (s, 1H), 3.62-3.61 (m, 1H), 3.33-3.19 (m, 3H), 2.81 (s, 1H), 1.18-1.01 (m, 6H).  $^{13}\text{C NMR}$  (101 MHz,  $\text{CDCl}_3$ )  $\delta$  167.1, 88.0,

80.8, 75.9, 71.9, 71.2, 69.6, 67.6, 64.0, 42.9, 39.6, 14.2, 12.9; **HRMS (ESI):**  $m/z$  calculated for  $C_{17}H_{20}FeNO^+$   $[M+H]^+$ : 310.0889, found: 310.0883.

**(b) 2-vinyl-(diethyl-1-carbonyl)ferrocene (6):**

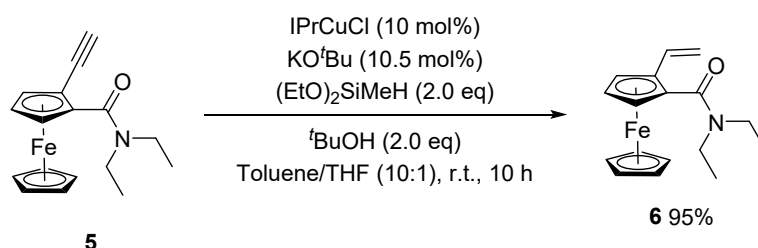

IPrCuCl (5.0 mg, 0.01 mmol) and aqueous potassium *tert*-butoxide (1.2 mg, 0.0105 mmol) were dissolved in THF (0.1 mL), and the mixture was stirred using a magnetic stirrer at room temperature under argon atmosphere for 15 min before adding a solution of **5** (31.0 mg, 0.1 mmol), *tert*-butanol (18.6  $\mu$ L, 0.2 mmol) and (EtO)<sub>2</sub>MeSiH (22.4  $\mu$ L, 0.2 mmol) in toluene (1 mL). The reaction mixture was allowed to stir at ambient temperature for 10 h. The mixture was concentrate under vacuo and purified by flash column chromatography (hexane/ethyl acetate, 10:1) to afford **6** as a yellow solid (29.6 mg, 95% yield); **m.p.**: 99-101 °C; **<sup>1</sup>H NMR (400 MHz, CDCl<sub>3</sub>)**  $\delta$  6.58 (dd,  $J = 17.3, 11.0$  Hz, 1H), 5.36 (d,  $J = 17.5$  Hz, 1H), 5.07 (d,  $J = 10.7$  Hz, 1H), 4.48 (s, 1H), 4.37 (s, 1H), 4.23 (s, 6H), 3.60-3.58 (m, 1H), 3.29-3.15 (m, 3H), 1.24-1.17 (m, 6H). **<sup>13</sup>C NMR (101 MHz, CDCl<sub>3</sub>)**  $\delta$  168.4, 133.1, 112.1, 84.7, 83.1, 71.0, 68.8, 67.2, 64.4, 42.9, 39.6, 23.8, 23.6, 14.1, 12.9; **HRMS (ESI):**  $m/z$  calculated for  $C_{17}H_{22}FeNO^+$   $[M+H]^+$ : 312.1045, found: 312.1031.

**(c) 2-(1-phenyl-1H-1,2,3-triazol-5-yl)-(diethyl-1-carbonyl)ferrocene (7):**

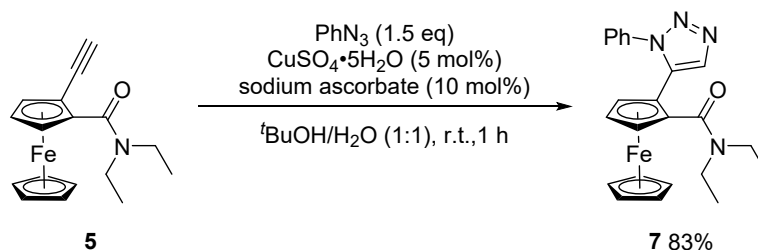

**5** (31.0 mg, 0.1 mmol) was dissolved in *tert*-butanol (0.5 mL) and H<sub>2</sub>O (0.5 mL) 1:1. Add CuSO<sub>4</sub>·5H<sub>2</sub>O (0.8 mg, 0.005 mmol) and sodium ascorbate (1.98 mg, 0.01 mmol) to the solution. Stir the solution for 10 min and add PhN<sub>3</sub> (18 μL, 0.15 mmol), stir the react for 1 h at room temperature. At the end of reaction, added water and extracted with EA. The extract was washed with saturated sodium chloride solution, dried over anhydrous Na<sub>2</sub>SO<sub>4</sub>, and separated by column chromatography (hexane/ethyl acetate, 2:1) to afford **7** as a yellow solid (35.6 mg, 83% yield); **m.p.**: 119-121 °C; **<sup>1</sup>H NMR (400 MHz, CDCl<sub>3</sub>)** δ 8.28 (s, 1H), 7.78-7.76 (m, 2H), 7.54-7.51 (m, 2H), 7.43 (t, *J* = 7.3 Hz, 1H), 5.12 (s, 1H), 4.46 (s, 1H), 4.36 (s, 1H), 4.23 (s, 5H), 3.66-3.65 (m, 1H), 3.31-3.10 (m, 3H), 1.25-1.20 (m, 6H). **<sup>13</sup>C NMR (101 MHz, CDCl<sub>3</sub>)** δ 168.6, 145.9, 137.1, 129.7, 128.5, 120.3, 118.6, 83.7, 76.0, 71.5, 67.9, 67.5, 67.3, 43.2, 40.0, 14.0, 13.1; **HRMS (ESI)**: *m/z* calculated for C<sub>23</sub>H<sub>25</sub>FeN<sub>4</sub>O<sup>+</sup> [M+H]<sup>+</sup>: 429.1372, found: 429.1333.

**(d) 2-(4-methyl benzoate)ethynyl-(diethyl-1-carbonyl)ferrocene (**8**):**

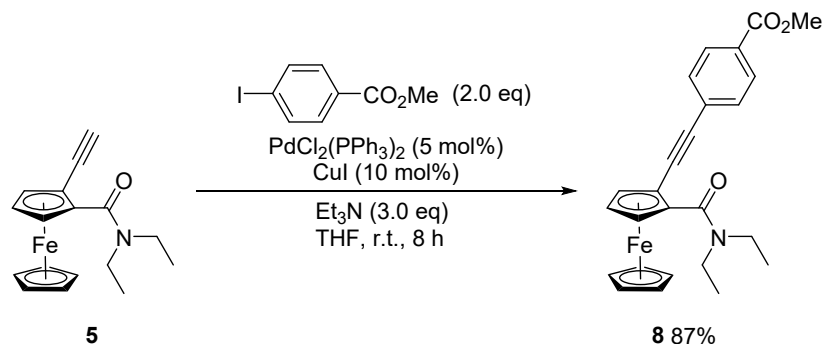

4-Iodobenzoic acid methyl ester (52.4 mg, 0.2 mmol) and **5** (31.0 mg, 0.1 mmol) were dissolved in THF (1.0 mL), and Et<sub>3</sub>N (21.0 μL, 0.3 mmol), Pd(PPh<sub>3</sub>)<sub>2</sub>Cl<sub>2</sub> (3.6 mg, 0.005 mmol) and CuI (2.0 mg, 0.01 mmol) were added. The mixture was stirred at room temperature for 8 h. At the end of reaction, added water and extracted with EA. The extract was washed with saturated sodium chloride solution, dried over anhydrous Na<sub>2</sub>SO<sub>4</sub>, and separated by column chromatography (hexane/ethyl acetate, 5:1) to afford **8** as a yellow solid (38.6 mg, 87% yield); **m.p.**: 103-105 °C; **<sup>1</sup>H NMR (400 MHz, CDCl<sub>3</sub>)** δ 7.99-7.97 (m, 2H), 7.50-7.48 (m, 2H), 4.54-4.53 (m, 2H), 4.40 (s, 5H), 4.31 (t, *J* = 2.3 Hz, 1H), 3.92 (s, 3H), 3.75-3.72 (m, 1H), 3.28-3.18 (m, 3H),

1.25-1.22 (m, 6H);  $^{13}\text{C}$  NMR (101 MHz,  $\text{CDCl}_3$ )  $\delta$  167.1, 166.6, 131.1, 129.5, 128.9, 128.5, 90.4, 88.4, 87.4, 72.0, 70.8, 70.3, 68.1, 68.0, 64.1, 52.2, 39.7, 38.7, 14.0, 13.1; HRMS (ESI):  $m/z$  calculated for  $\text{C}_{25}\text{H}_{26}\text{FeNO}_3^+ [\text{M}+\text{H}]^+$ : 444.1257, found: 444.1249.

### (E) Enantioselective C-H Alkynylation of Ferrocene

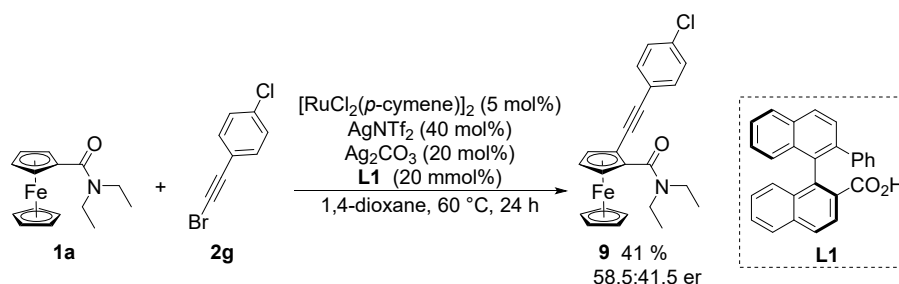

To a dried screw-capped vial, **1a** (14.2 mg, 0.05 mmol), **2g** (16.2 mg, 0.075 mmol),  $[\text{RuCl}_2(p\text{-cymene})]_2$  (1.51 mg, 0.0025 mmol),  $\text{AgNTf}_2$  (8.0 mg, 0.02 mmol),  $\text{Ag}_2\text{CO}_3$  (2.75 mg, 0.01 mmol), **L1** (3.74 mg, 0.01 mmol) and 1,4-dioxane (0.125 mL) were added under Ar atmosphere. The vial was capped, and the mixture was heated at 60 °C for 24 h with stirring. The resulting mixture was cooled to room temperature, and directly purified by silica gel column chromatography to give the alkynylated ferrocenecarboxamide product **9** (21.0 mg, 41% yield). HPLC separation (DAICEL CHIRALPAK AD-H, hexane:2-propanol = 95:5, flow rate: 1.0 mL/min, detection at 254nm):  $t_{\text{R}}(\text{major}) = 9.6$  min,  $t_{\text{R}}(\text{minor}) = 10.3$  min, 58.5:41.5 er.

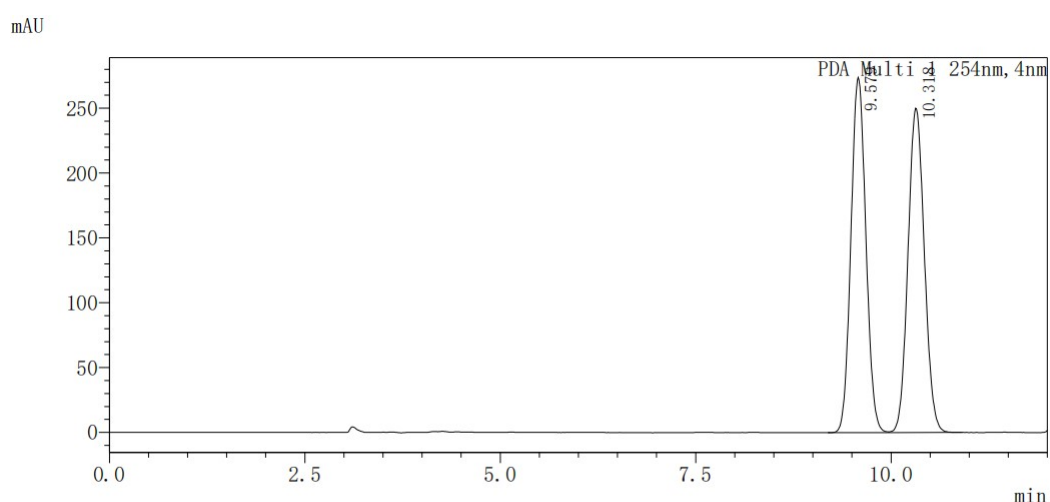

| PDA Ch1 254nm |           |        |
|---------------|-----------|--------|
| Peak No       | Ret. time | Area/% |
| 1             | 9.579     | 49.947 |
| 2             | 10.318    | 50.053 |

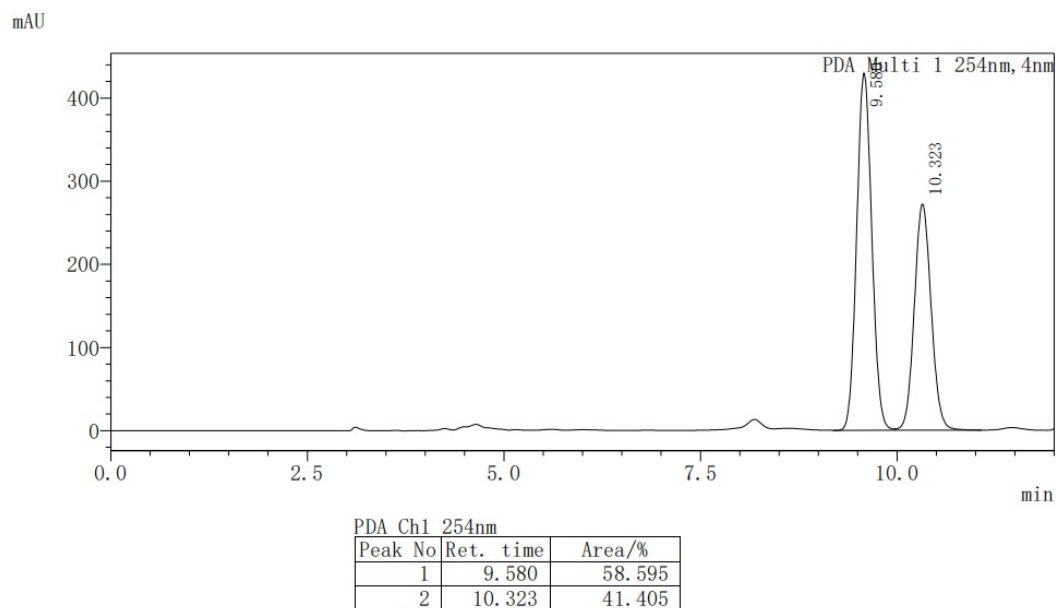

## (F) References

- [S1] M. Tazi, W. Erb, Y. S. Halauko, O. A. Ivashkevich, V. E. Matulis, T. Roisnel, V. Dorcet, F. Mongin, *Organometallics*, 2017, **36**, 4770.
- [S2] D.-Y. Huang, Q.-J. Yao, S. Zhang, X.-T. Xu, K. Zhang, B.-F. Shi, *Org. Lett.*, 2019, **21**, 951.
- [S3] L.-L. Zhang, J.-k. Zhao, Q. Mou, D.-W. Teng, X.-T. Meng, B. Sun, *Adv. Synth. Catal.*, 2020, **362**, 955.
- [S4] Z. Szarka, R. S. Földes, Á. Kuik, Z. Berente, L. Kollár, *Synthesis*, 2003, 545.
- [S5] Q. Mou, R.-Y. Zhao, R.-H. Niu, S. Fukagawa, T. Shigeno, T. Yoshino, S. Matsunaga, B. Sun, *Org. Chem. Front.*, 2021, **8**, 6923.
- [S6] A. S. Dillon, B. L. Flynn, *Org. Lett.*, 2020, **22**, 2987.
- [S7] S. R. Mudshinge, Y.-H. Yang, B. Xu, G. B. Hammond, Z.-C. Lu, *Angew. Chem. Int. Ed.*, 2022, **61**, e202115687.
- [S8] É. Godin, J. Santandrea, A. Caron, S. K. Collins, *Org. Lett.*, 2020, **22**, 5905.
- [S9] F. Beltran, L. Miesch, *Org. Lett.*, 2019, **21**, 1569.
- [S10] E. L. Perera, D. Lee, *Org. Lett.*, 2022, **24**, 7042.

## (G) NMR Spectra

### 2-Triisopropylsilyl ethynyl-(diethyl-1-carbonyl)ferrocene (**3a**):

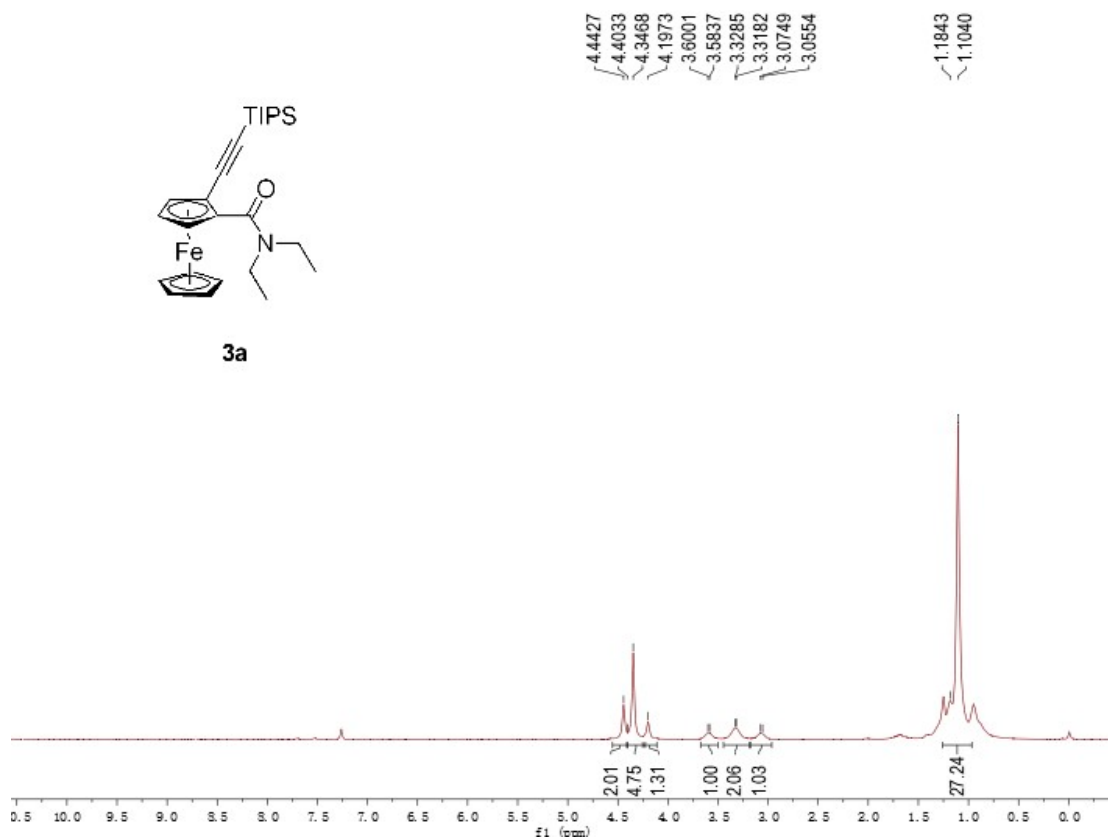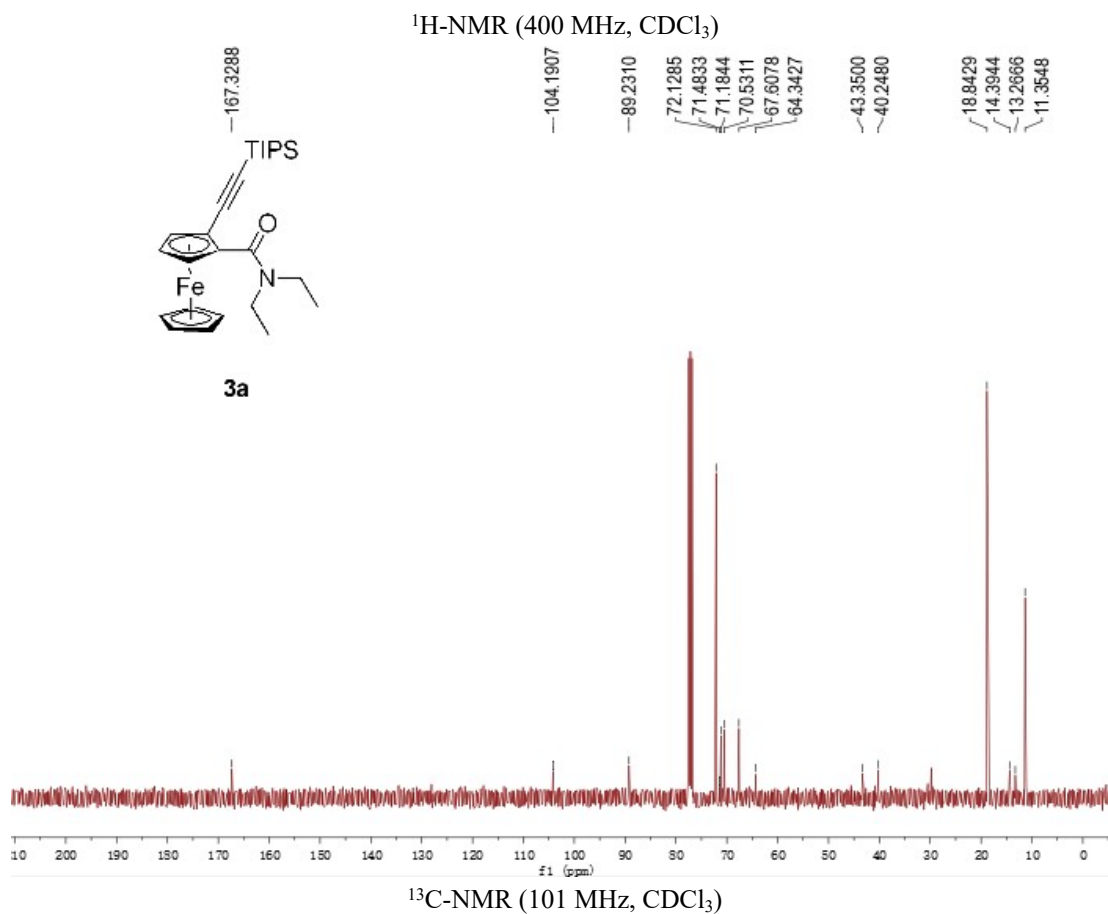

**2-Triisopropylsilylethynyl-(dimethyl-1-carbonyl)ferrocene (3b):**

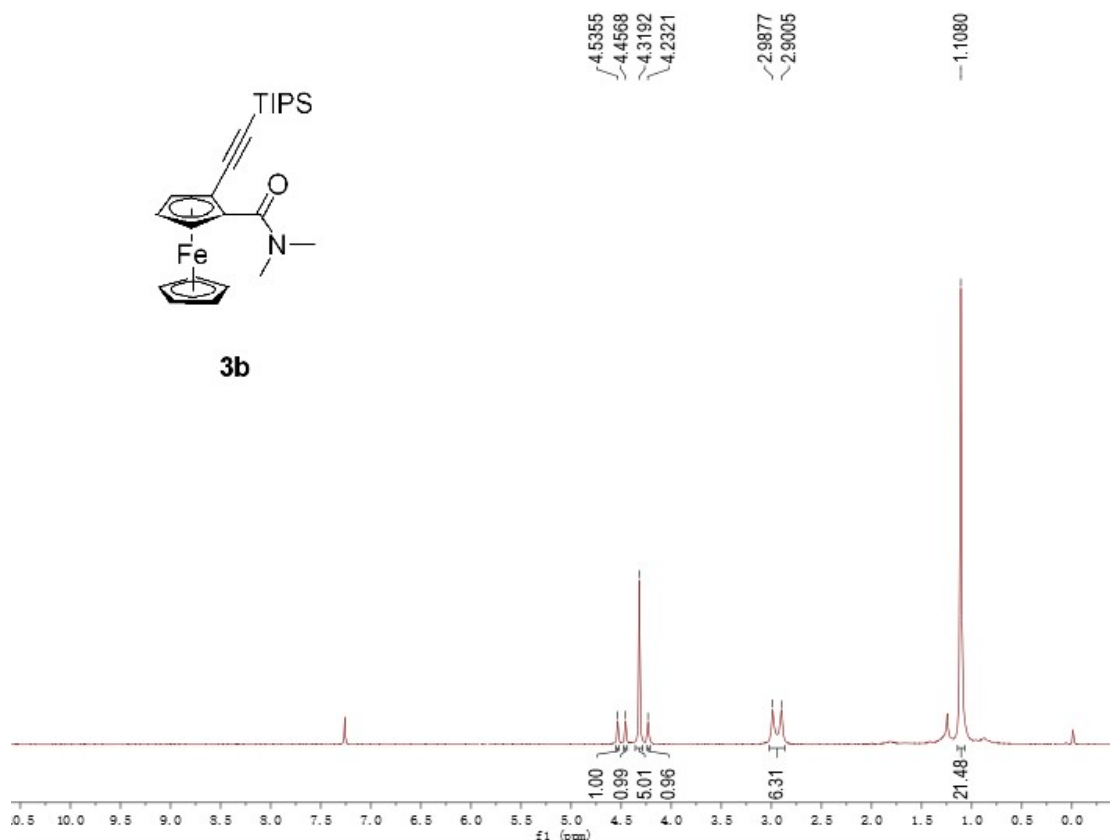

<sup>1</sup>H-NMR (400 MHz, CDCl<sub>3</sub>)

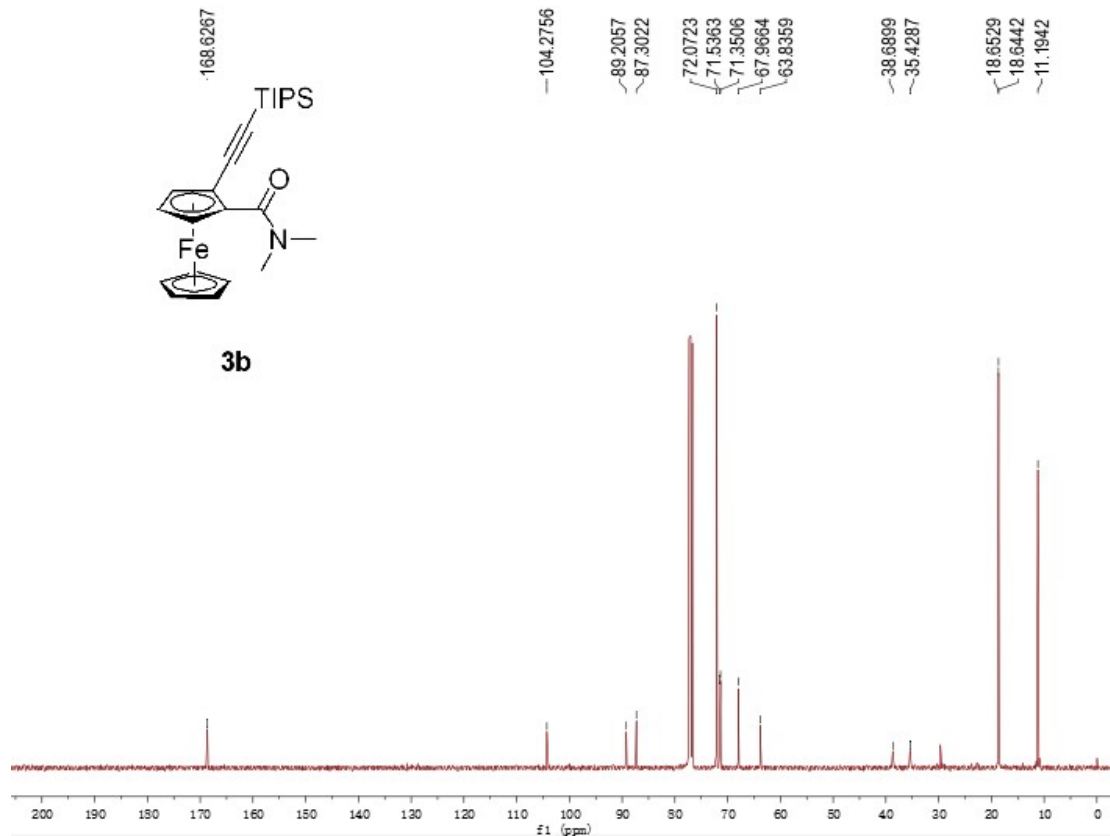

<sup>13</sup>C-NMR (101 MHz, CDCl<sub>3</sub>)



## 2-Triisopropylsilylethynyl-(methyl-ethyl-1-carbonyl)ferrocene (3c):

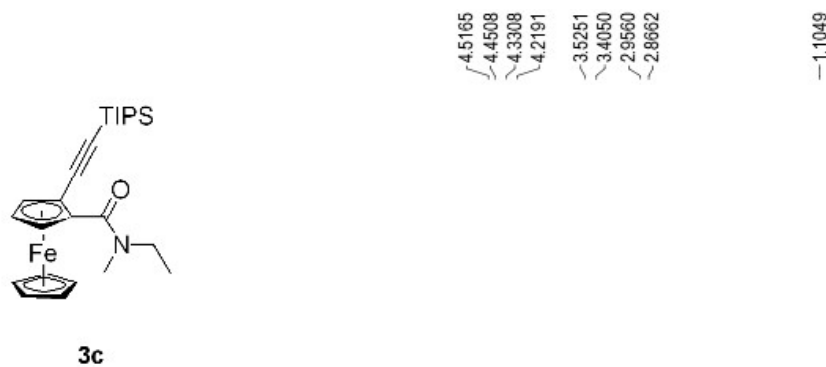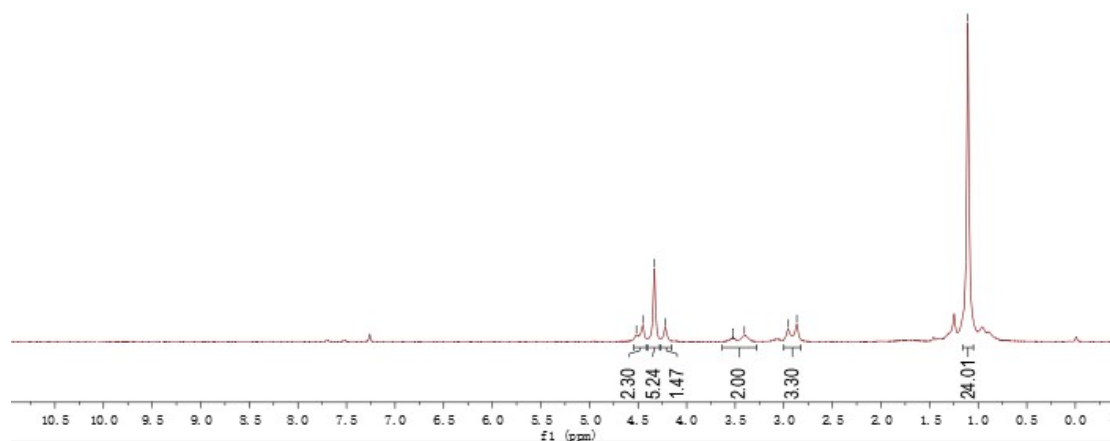

<sup>1</sup>H-NMR (400 MHz, CDCl<sub>3</sub>)

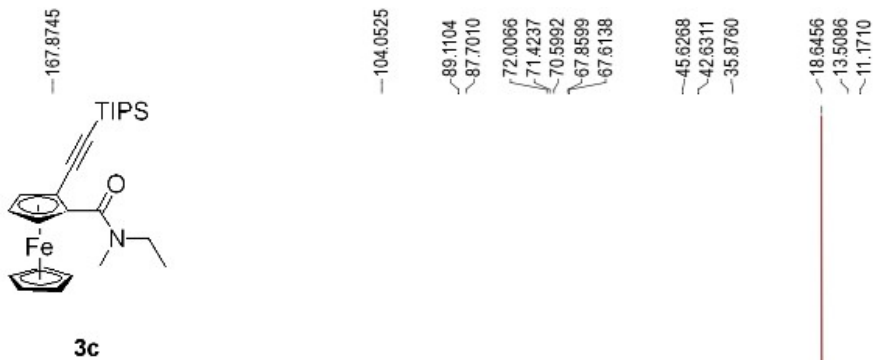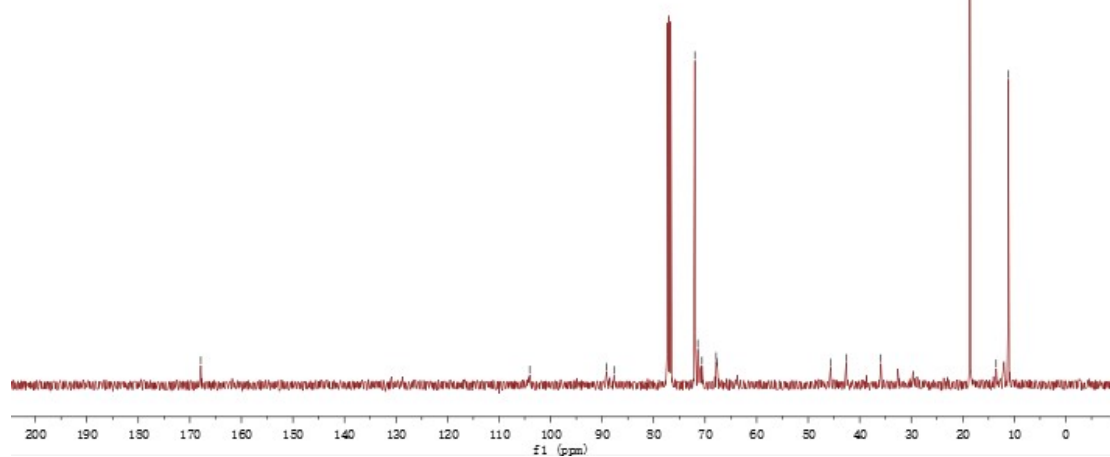

<sup>13</sup>C-NMR (101 MHz, CDCl<sub>3</sub>)

### 2-Triisopropylsilylethynyl-(diisopropyl-1-carbonyl)ferrocene (3d):

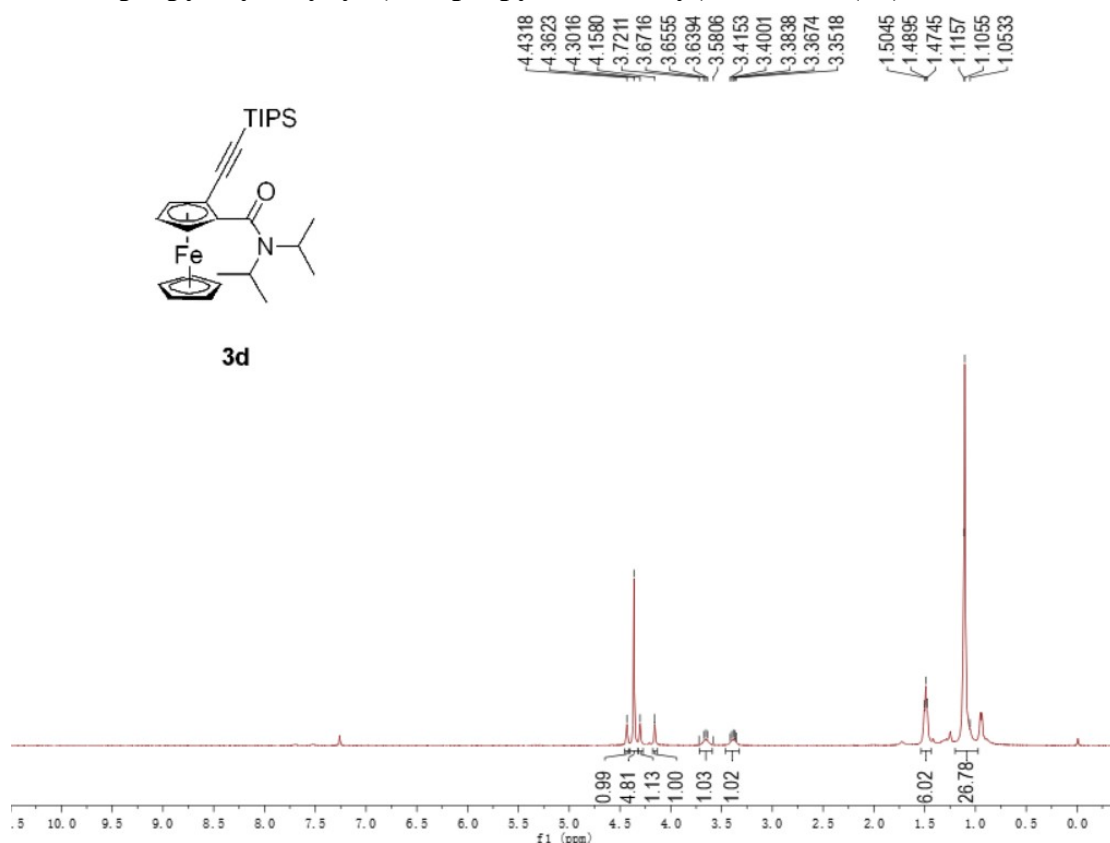

<sup>1</sup>H-NMR (400 MHz, CDCl<sub>3</sub>)

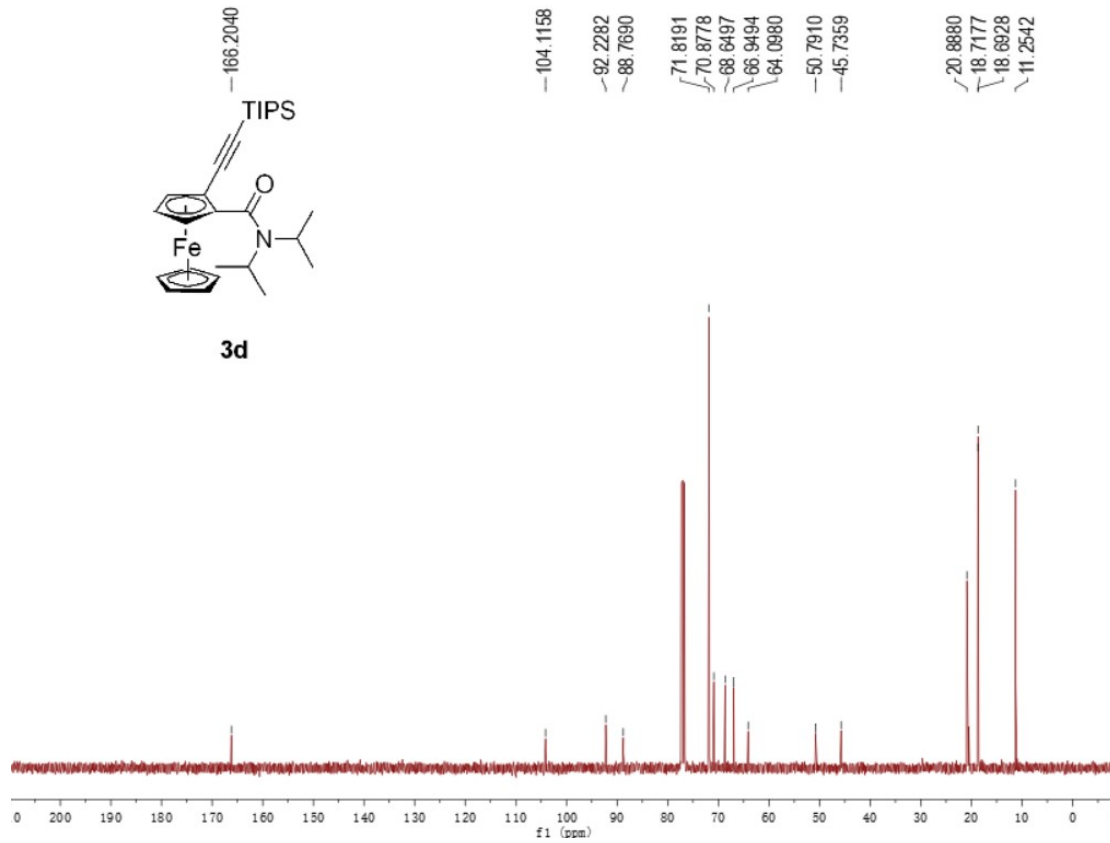

<sup>13</sup>C-NMR (101 MHz, CDCl<sub>3</sub>)

## 2-Triisopropylsilylethynyl-(dibutyl-1-carbonyl)ferrocene (3e):

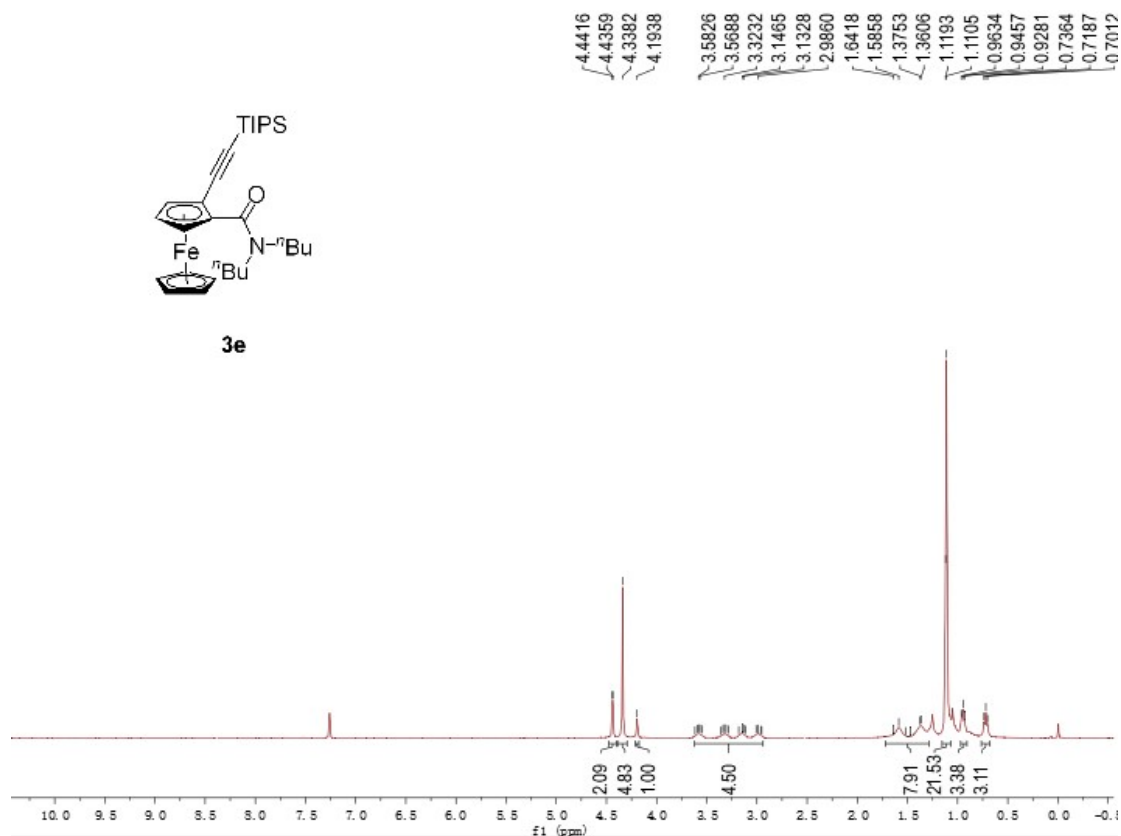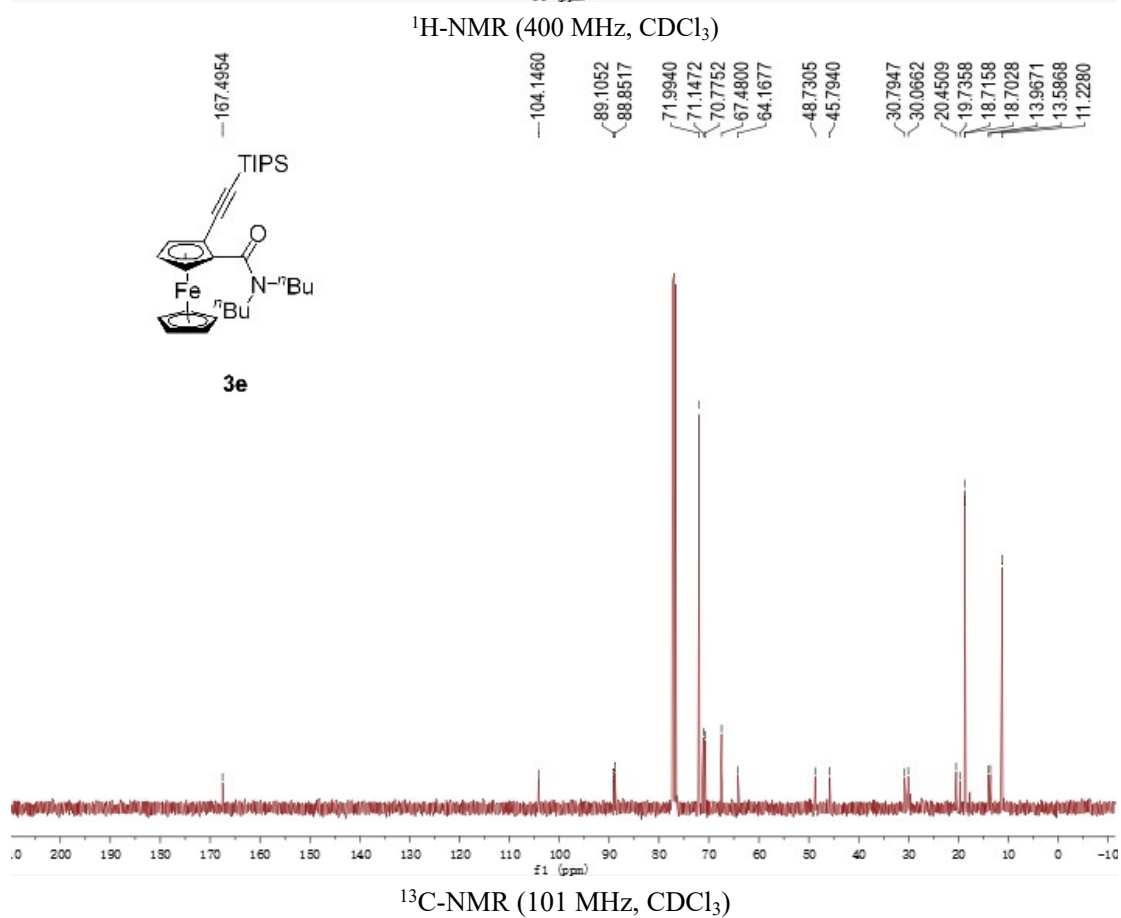

## 2-Triisopropylsilylethynyl-(diisobutyl-1-carbonyl)ferrocene (**3f**):

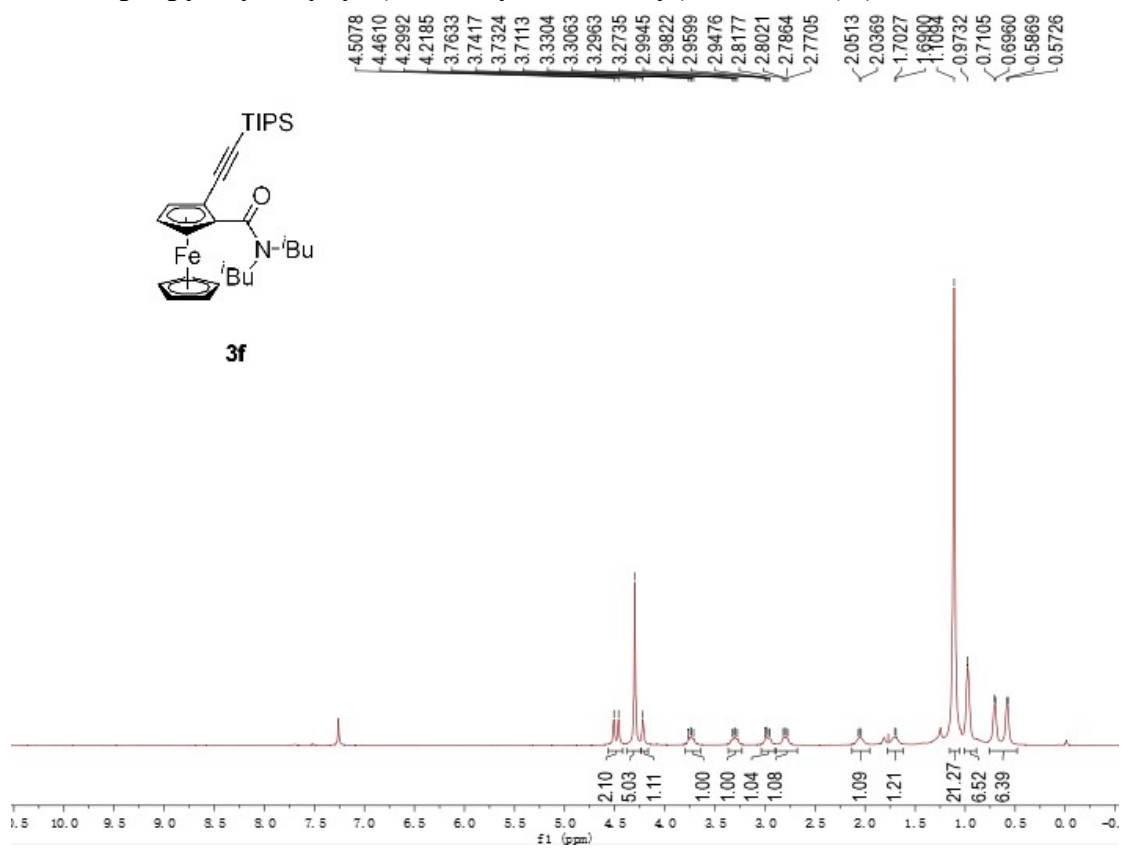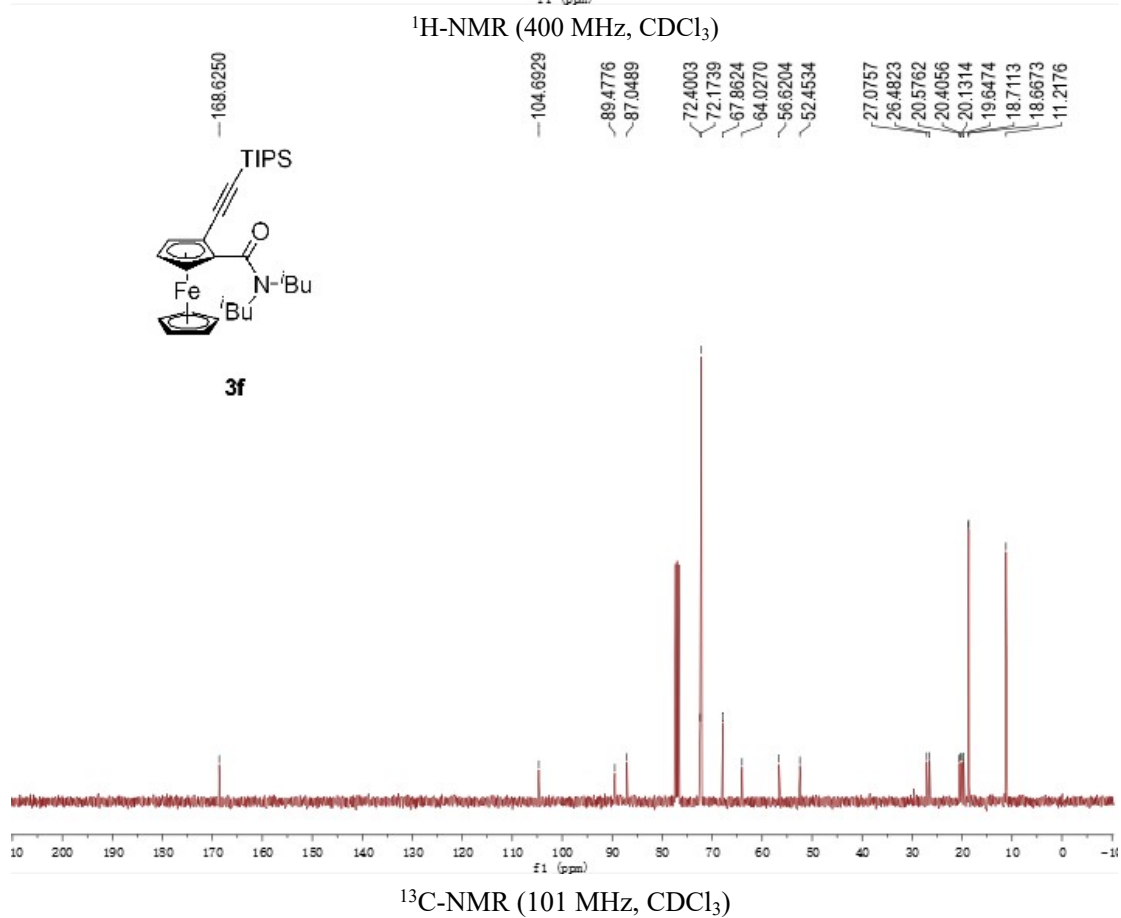

### 2-Triisopropylsilylethynyl-(methyl-benzyl-1-carbonyl)ferrocene (3g):

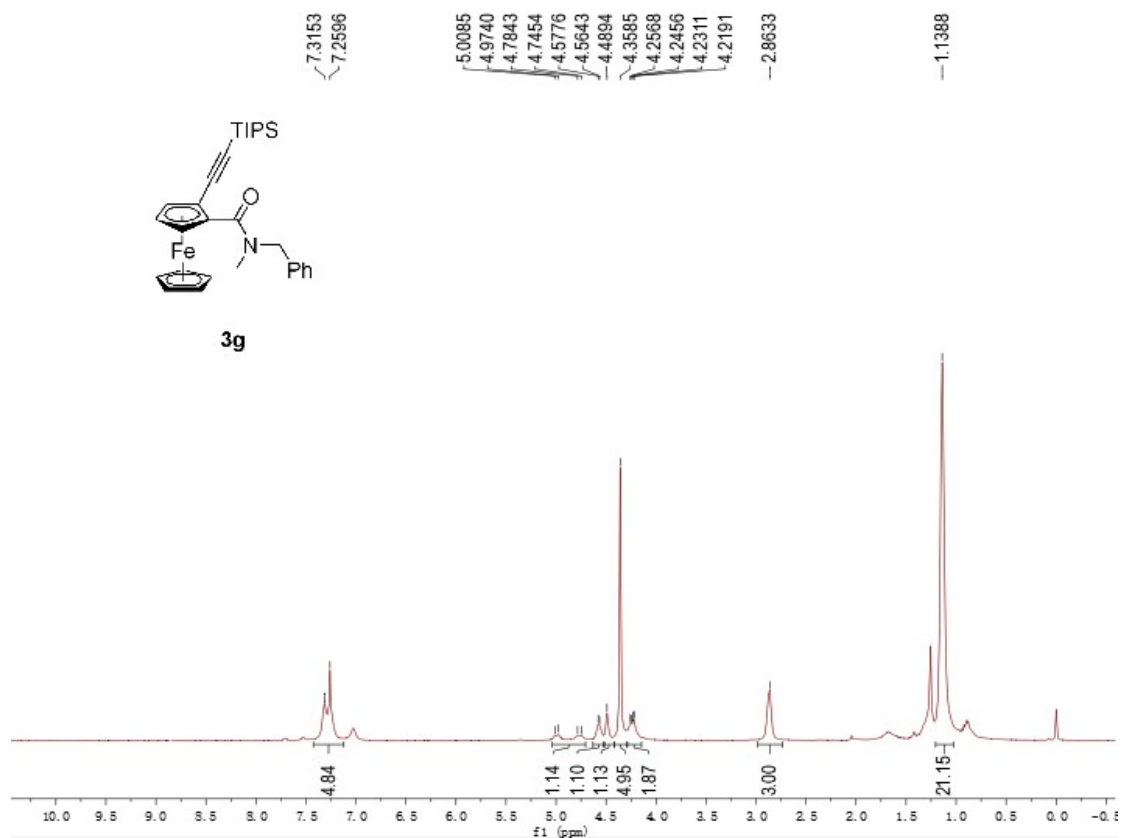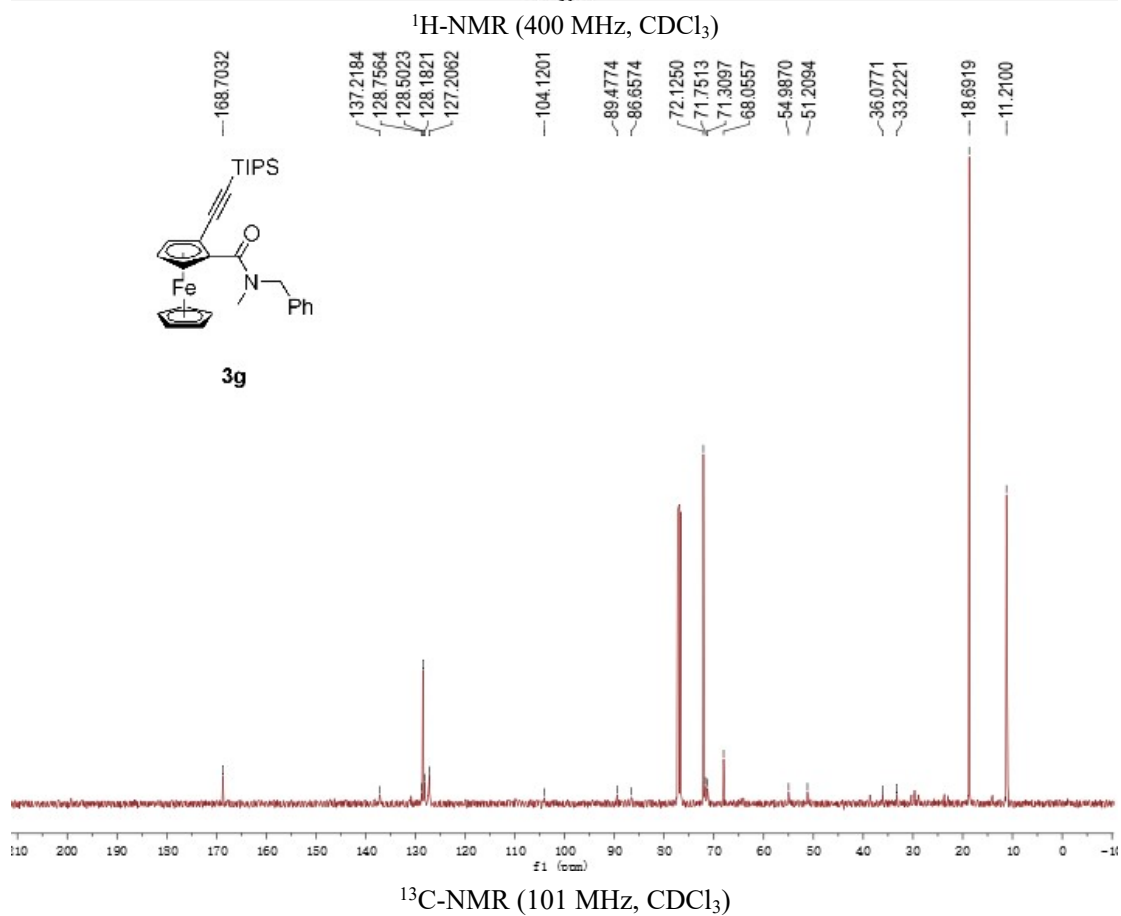

### 2-Triisopropylsilylethynyl-(dibenzyl-1-carbonyl)ferrocene (3h):

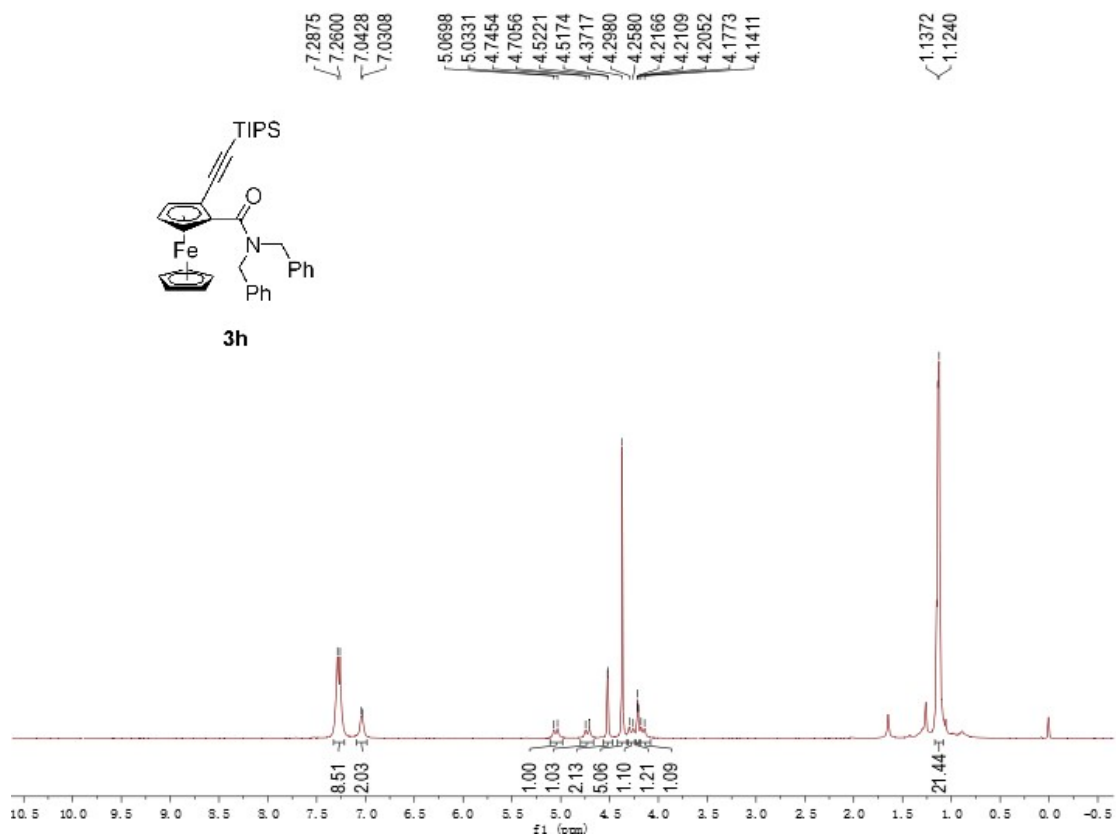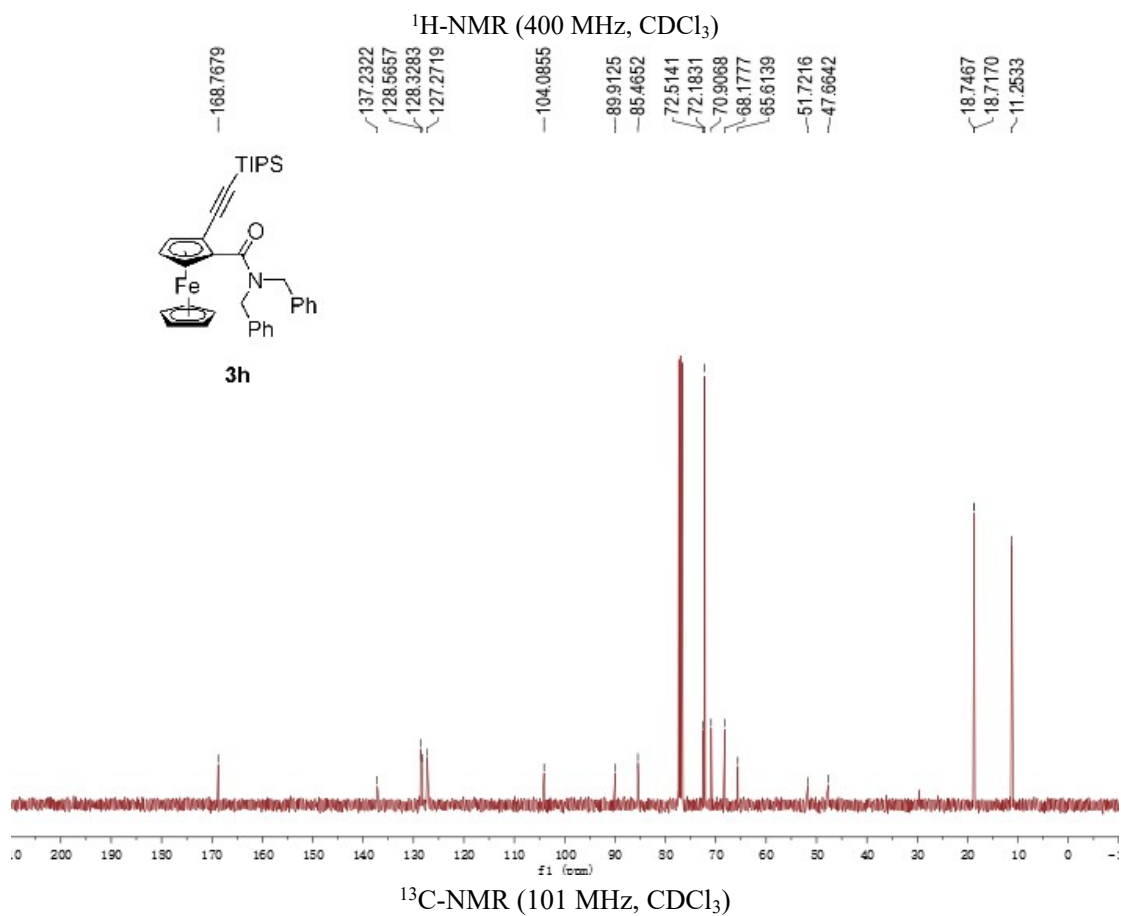

### 2-Triisopropylsilylethynyl-(pyrrolidine-1-carbonyl)ferrocene (**3i**):

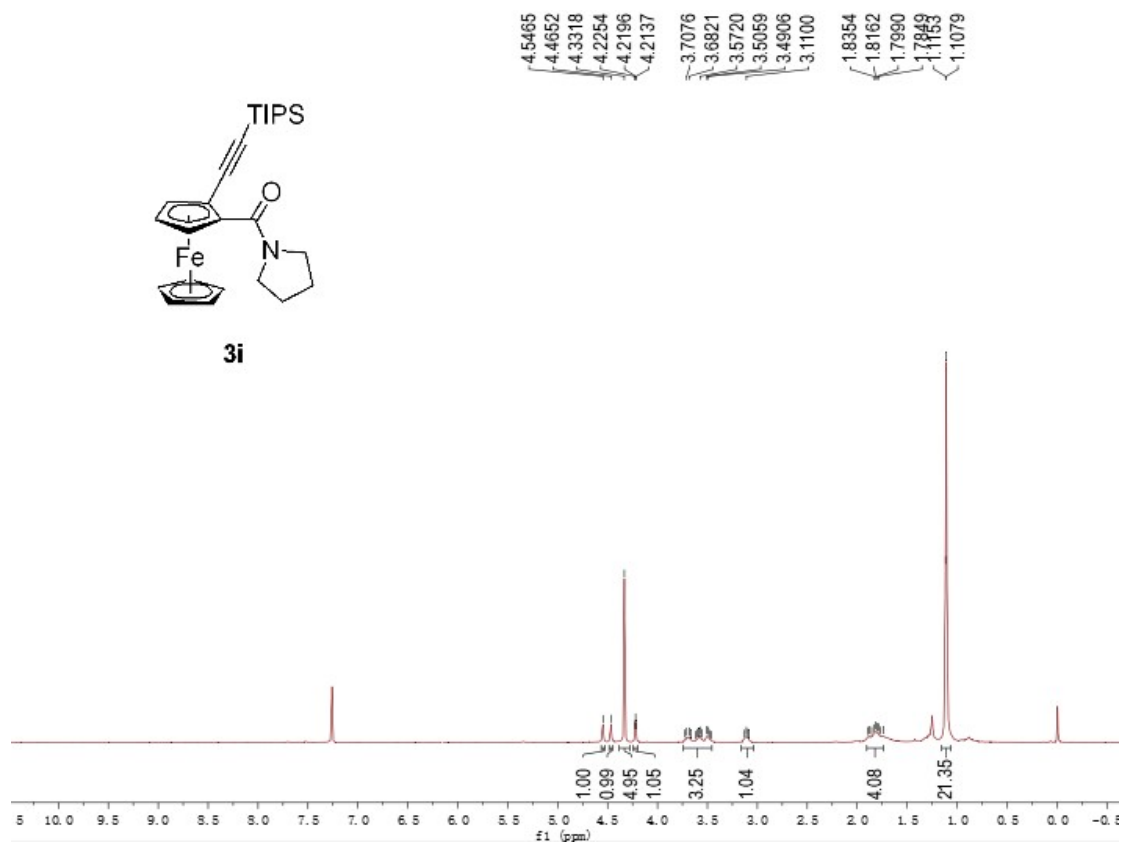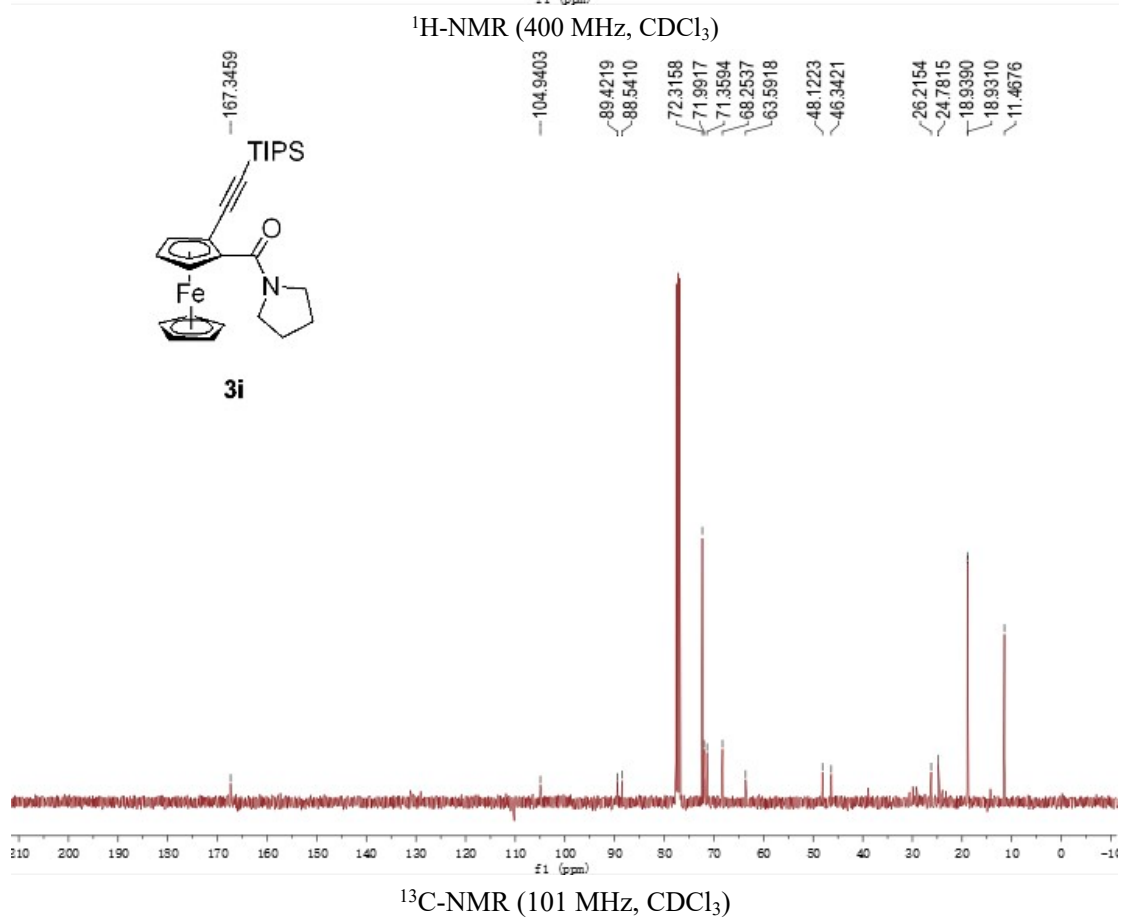

### 2-Triisopropylsilylethynyl-(piperidine-1-carbonyl)ferrocene (3j):

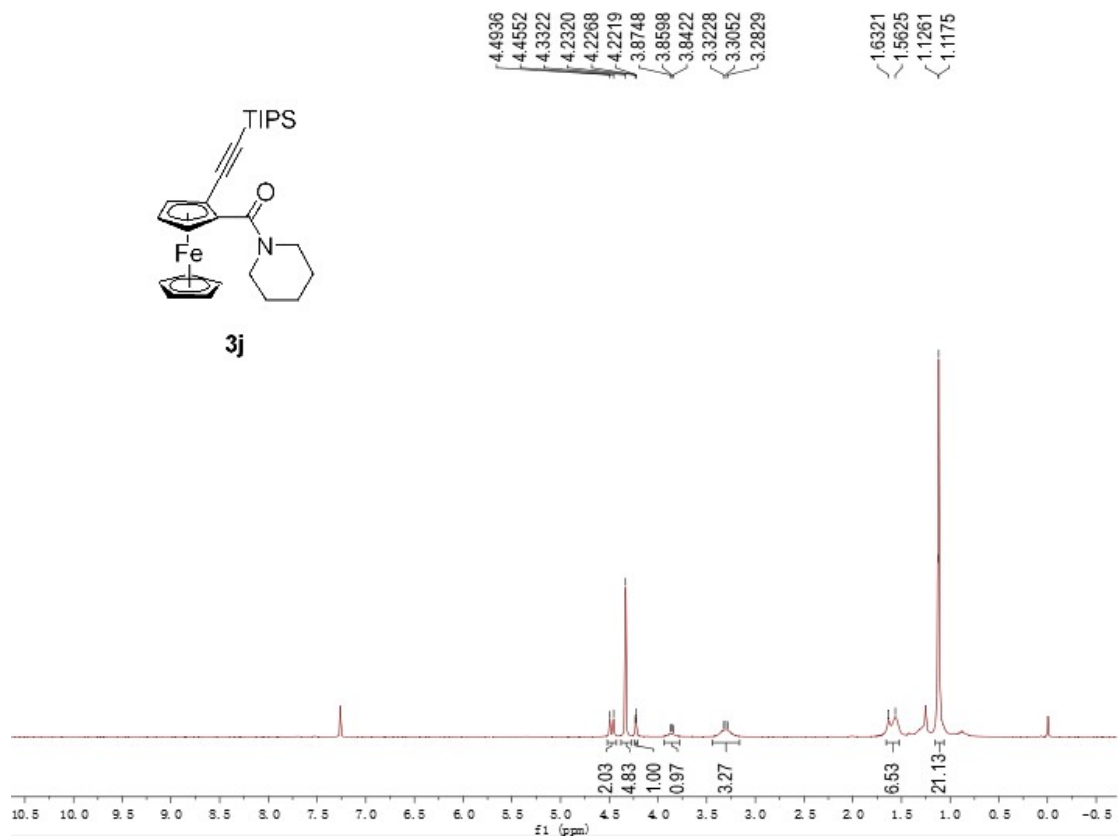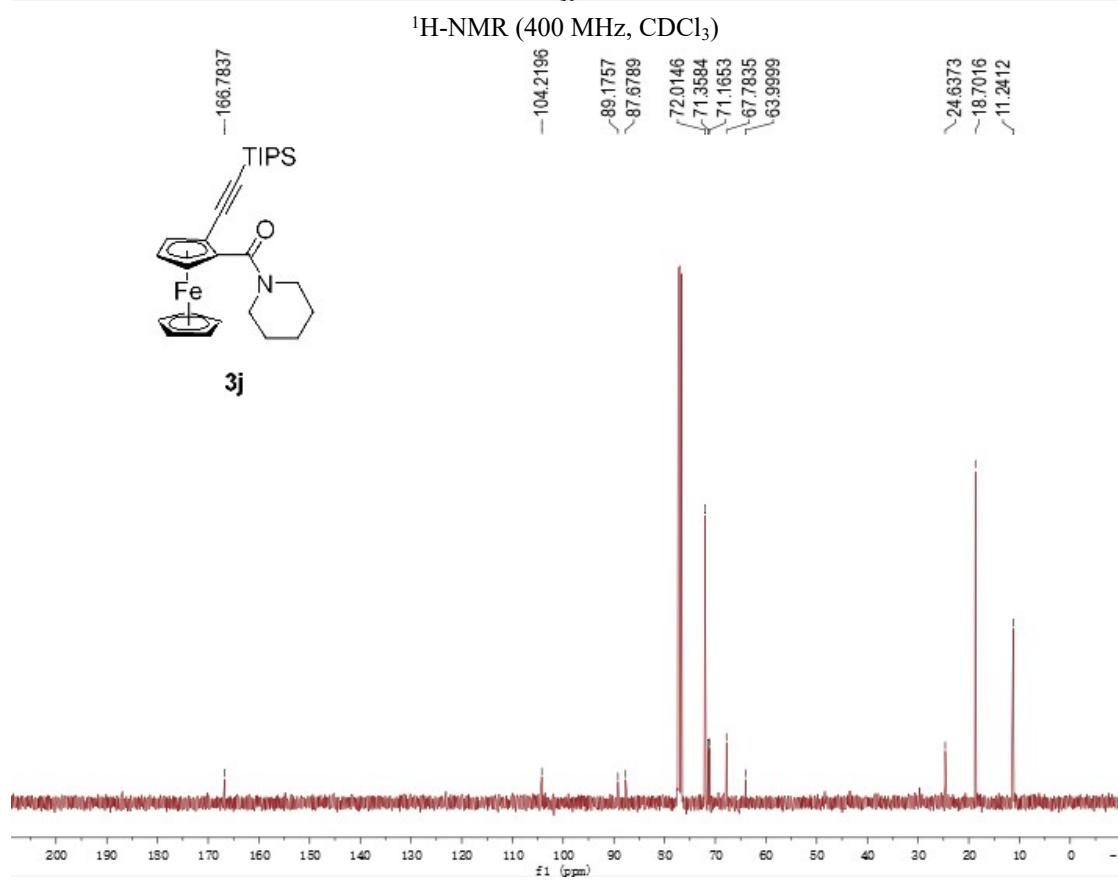



### 2-Triisopropylsilylethynyl-(morpholine-1-carbonyl)ferrocene (3k):

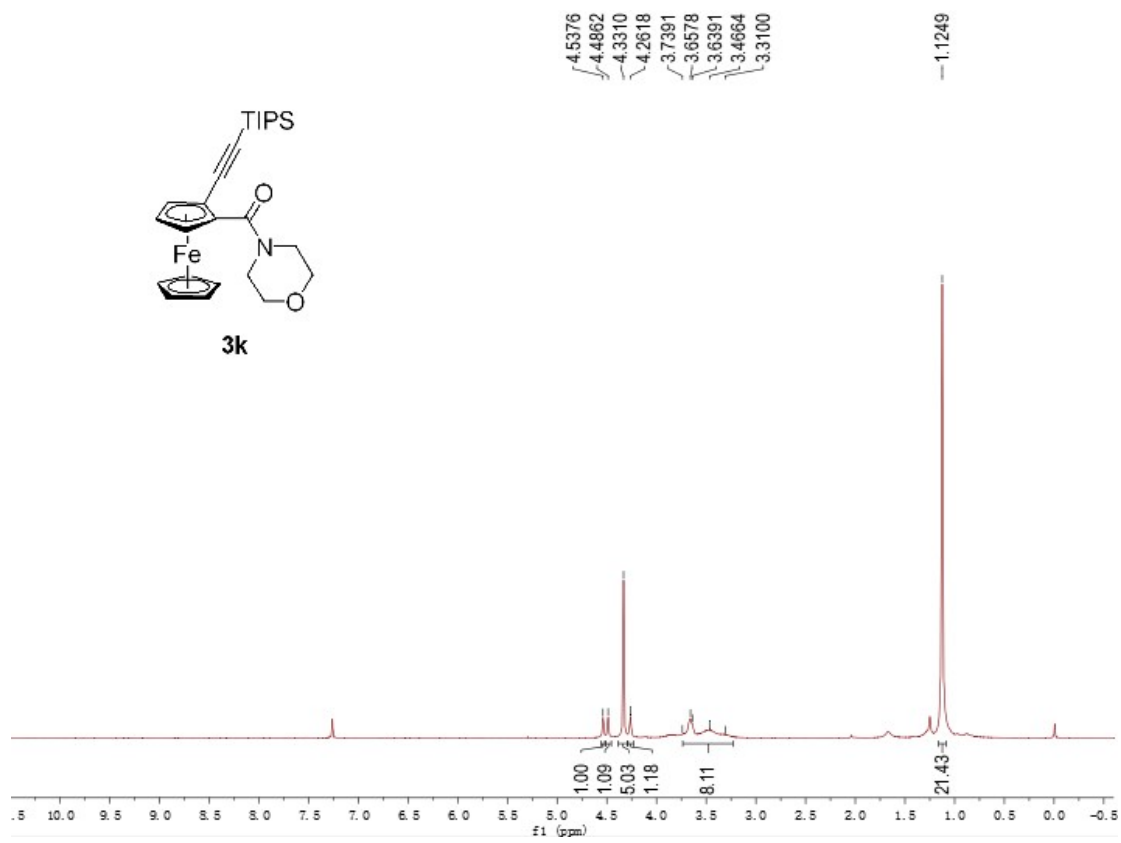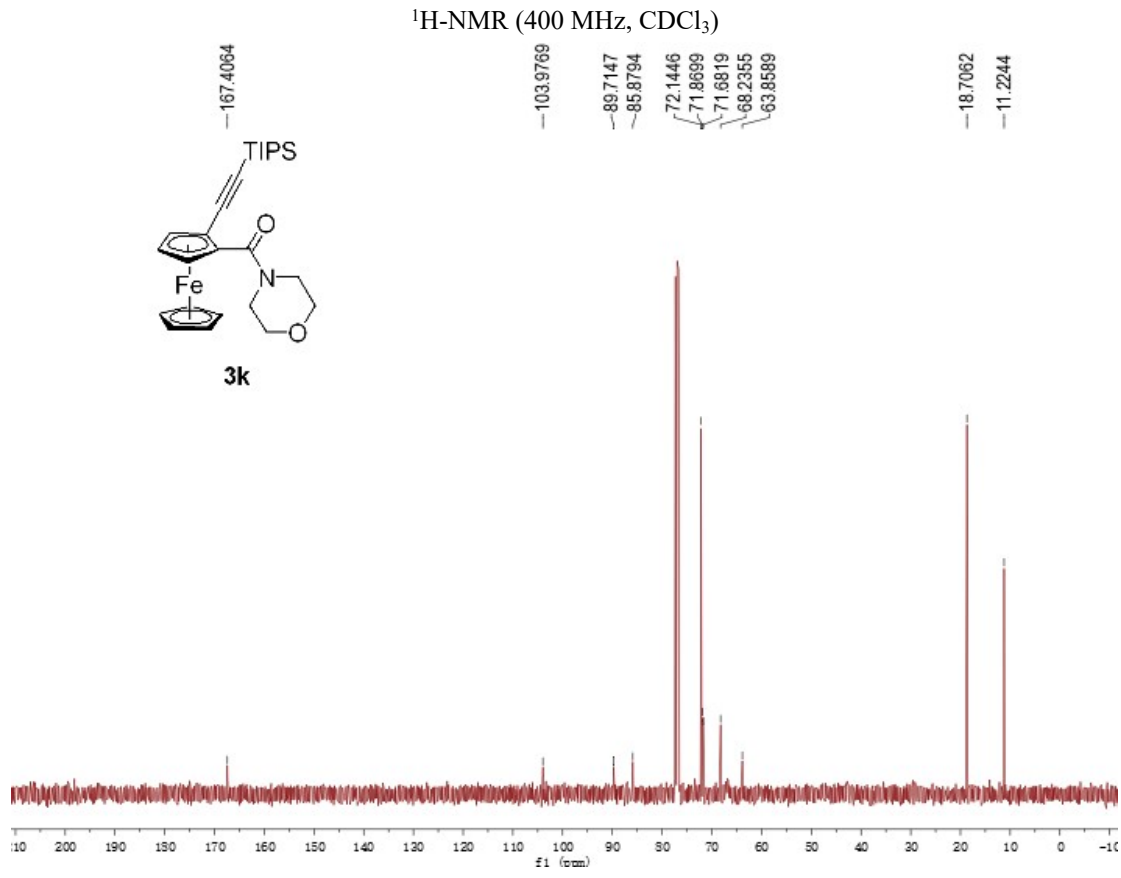

## 2-Triisopropylsilylethynyl-(N-phenylpiperazine-1-carbonyl)ferrocene (3I):

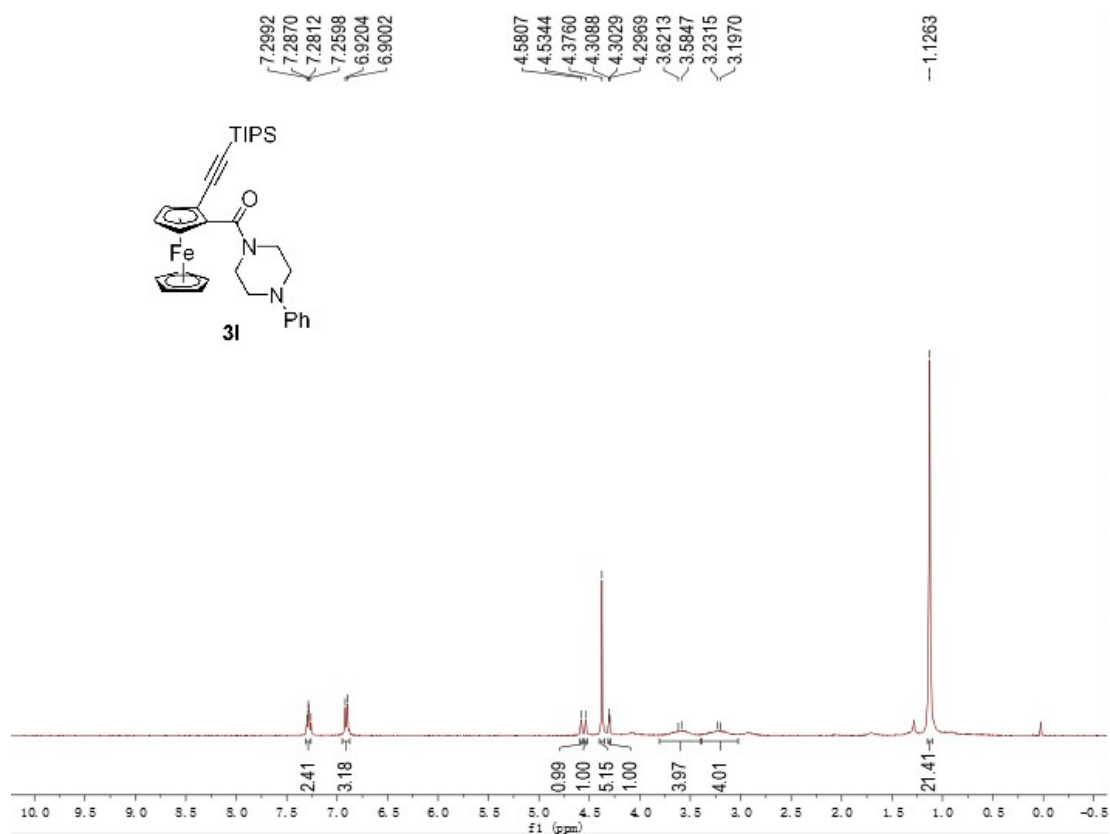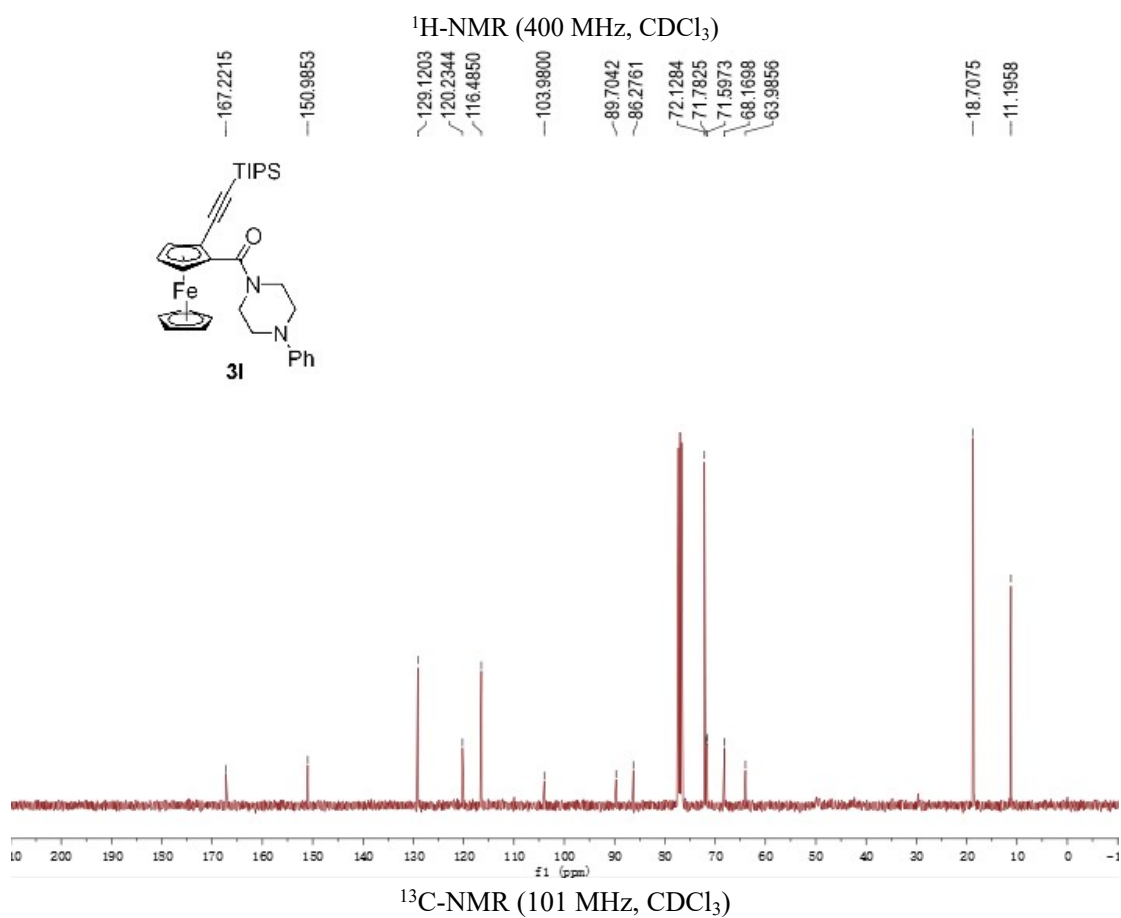

## 2-Triisopropylsilylethynyl-((4-piperidine-1-carbonyl)ferrocene (3m):

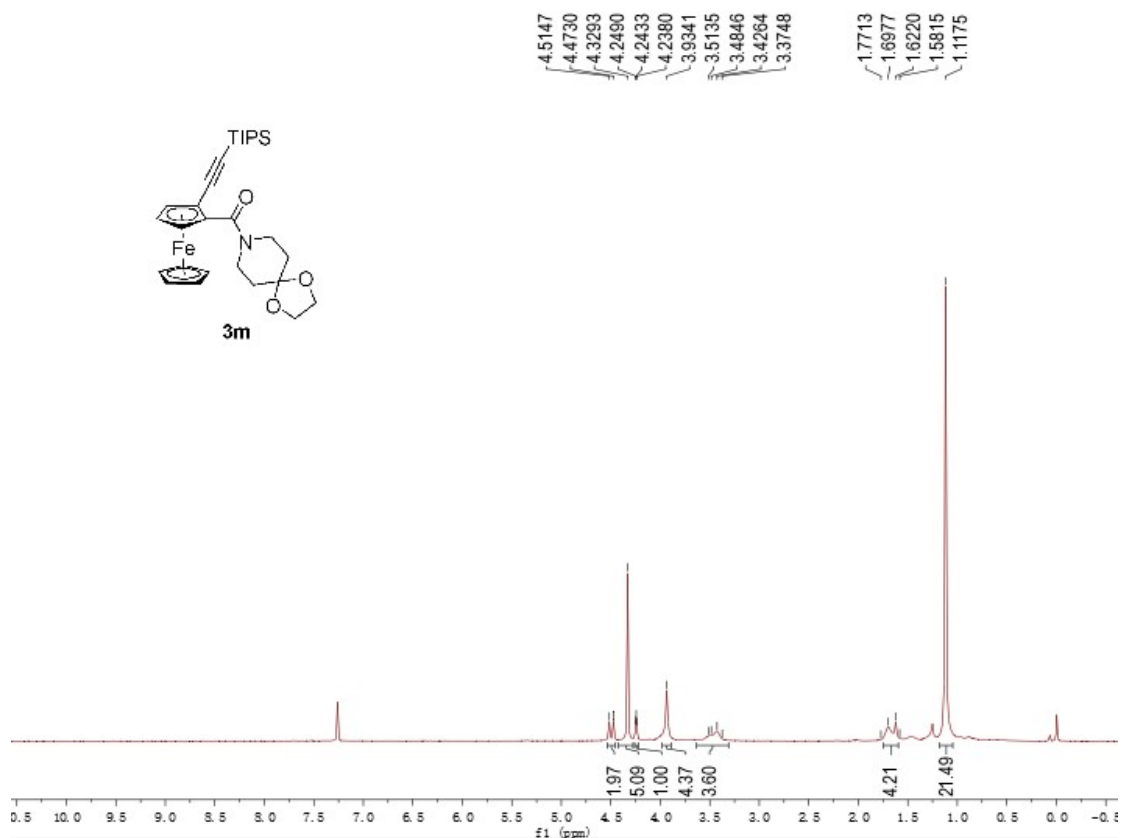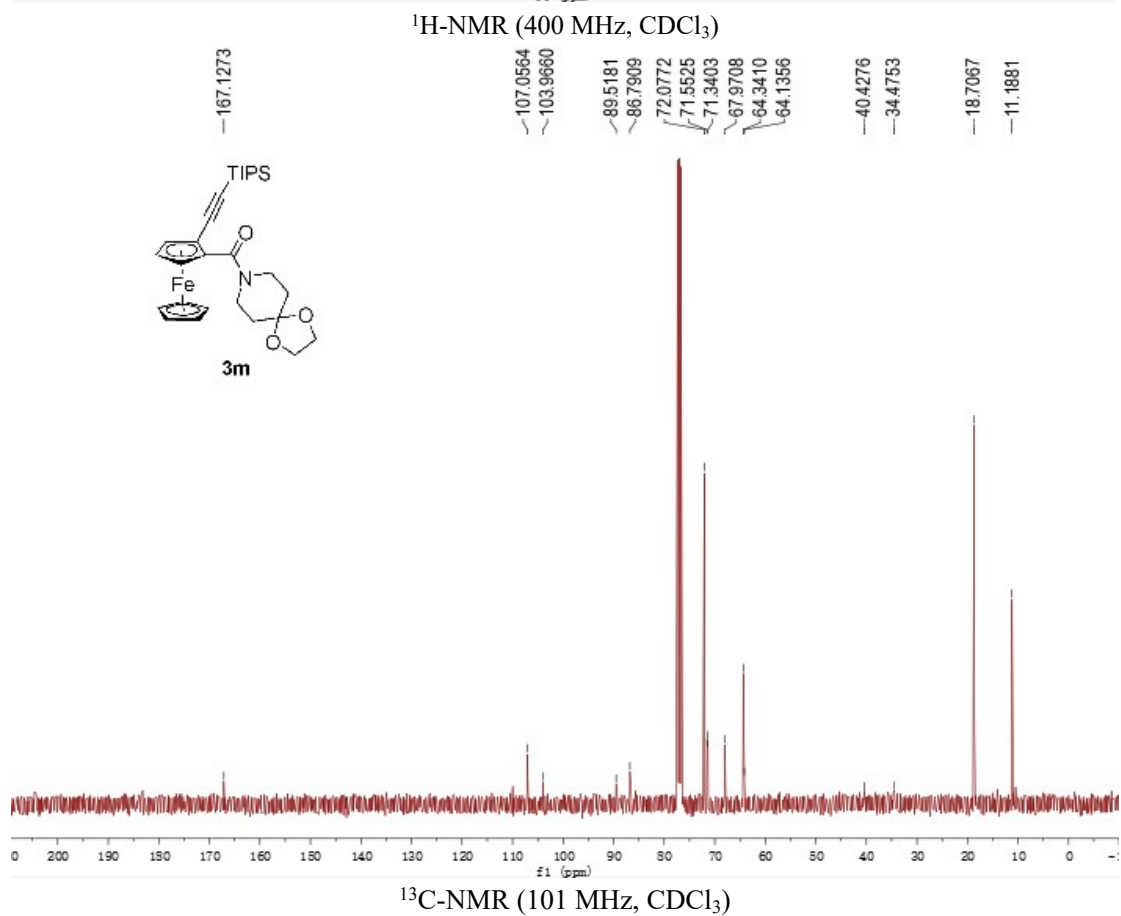

## 2-Triisopropylsilylethynyl-(azepane-1-carbonyl)ferrocene (**3n**):

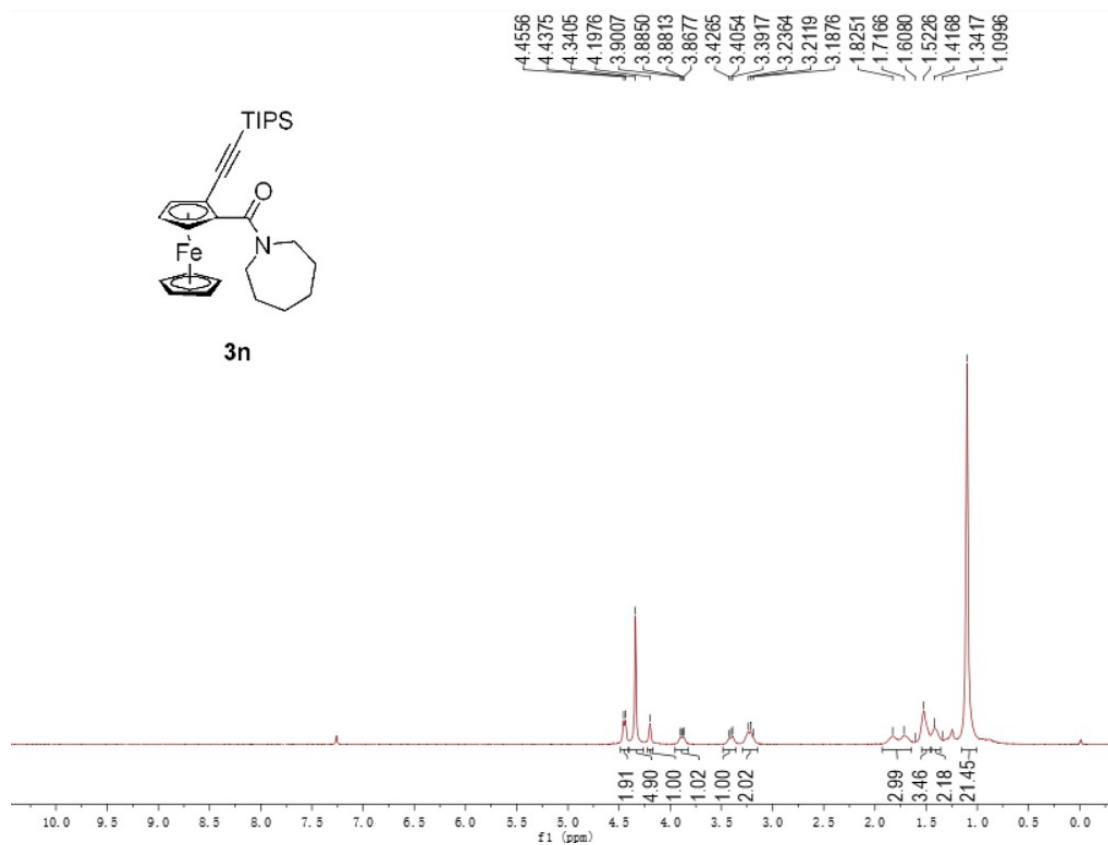

<sup>1</sup>H-NMR (400 MHz, CDCl<sub>3</sub>)

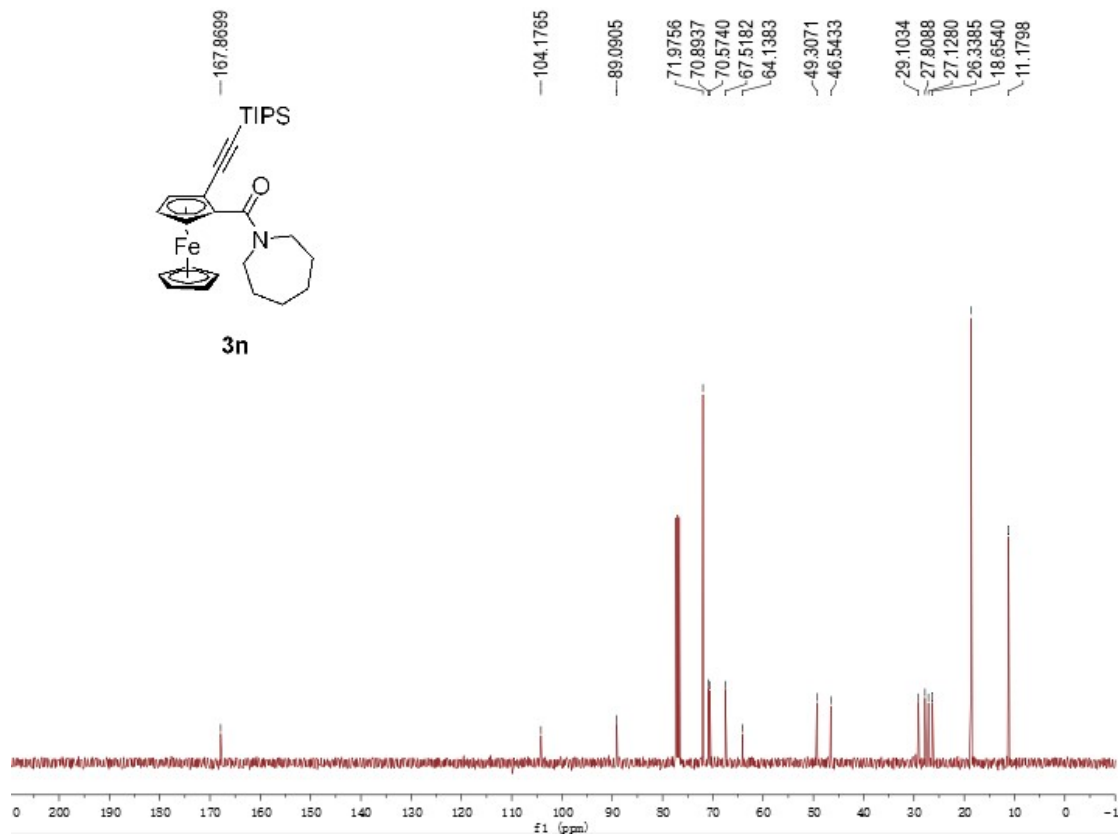

<sup>13</sup>C-NMR (101 MHz, CDCl<sub>3</sub>)

**2-Triisopropylsilylethynyl-(dimethyl-1-carbonyl)-1'-isopropyl-ferrocene (3o):**

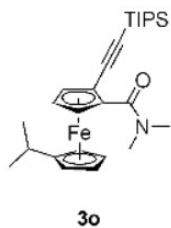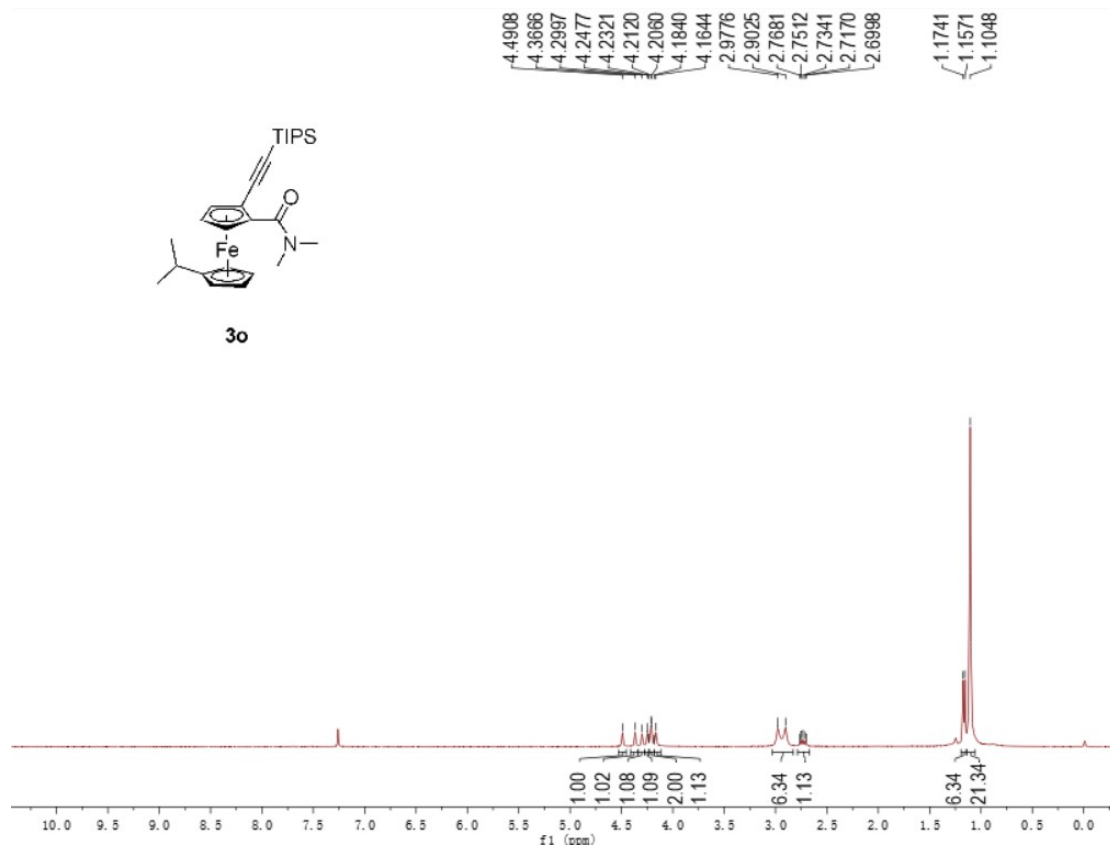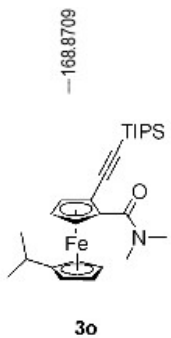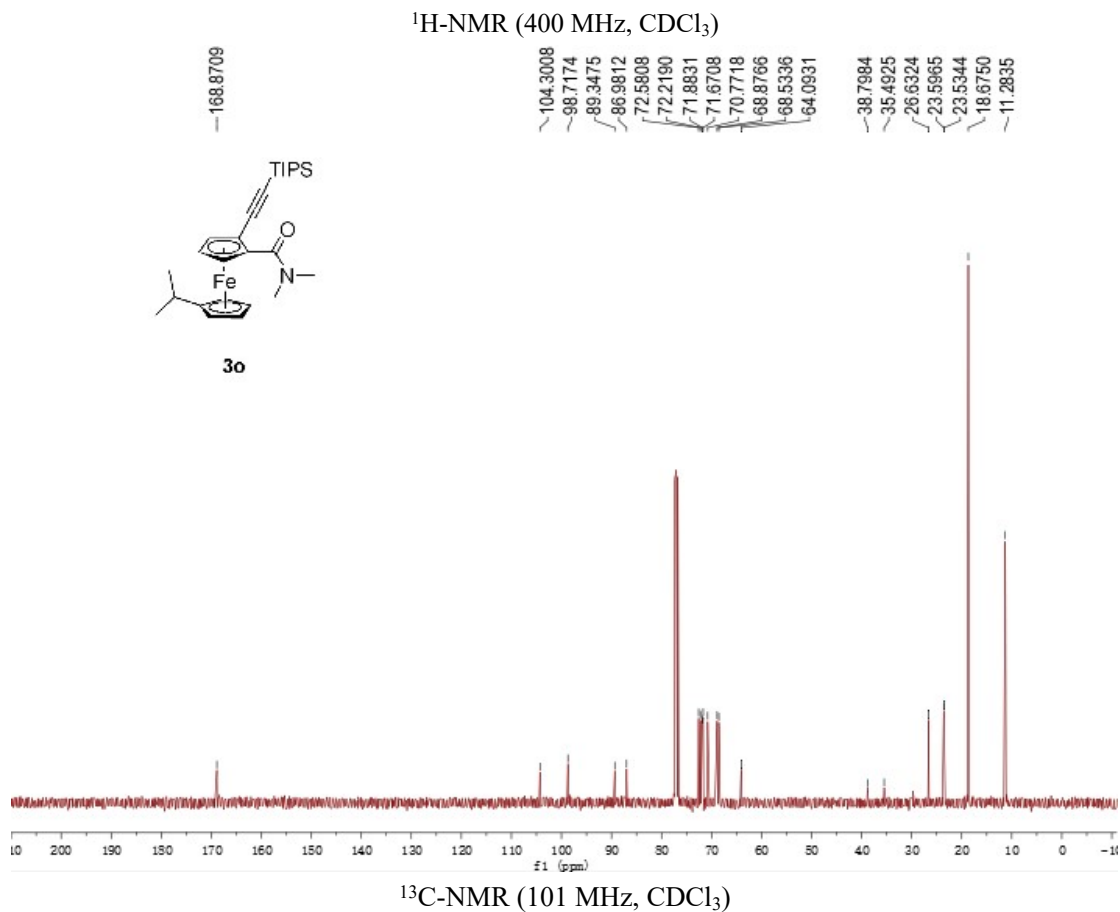

**2-Triisopropylsilylethynyl-(diethyl-1-carbonyl)-1'-ispropyl-ferrocene (3p):**

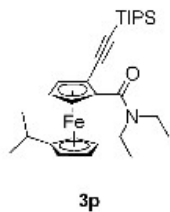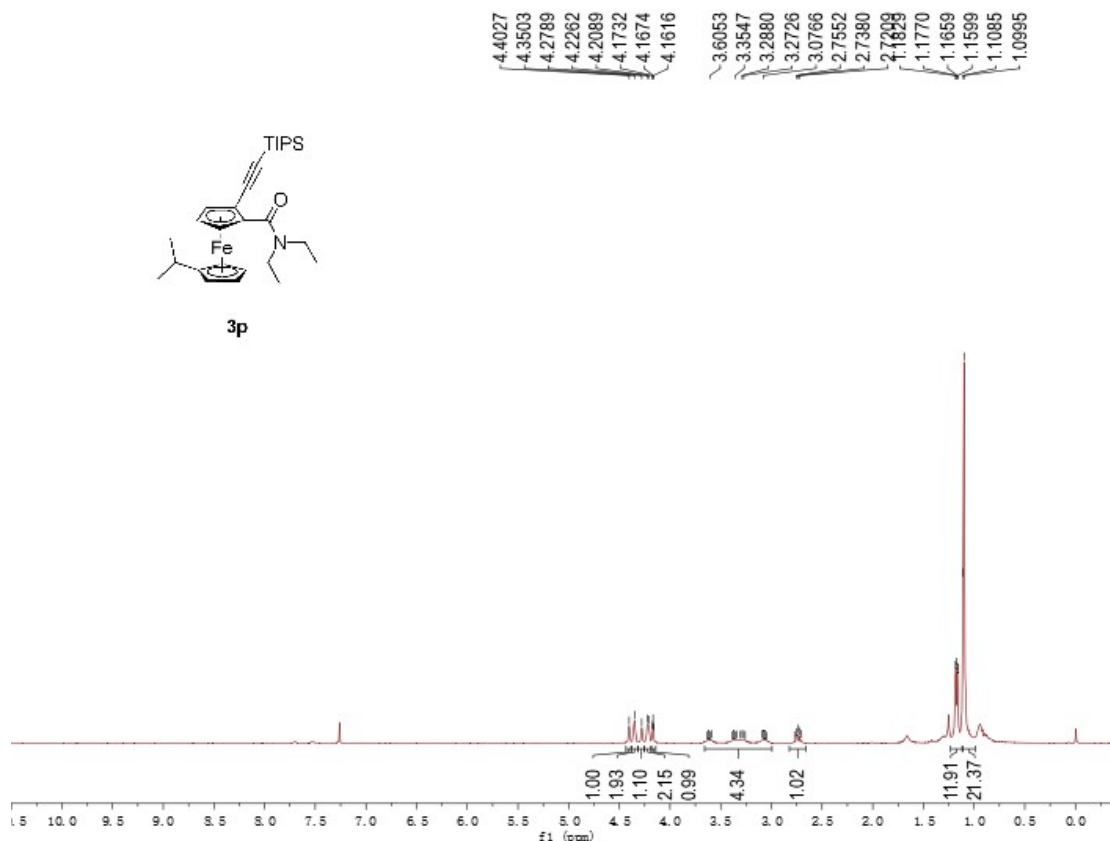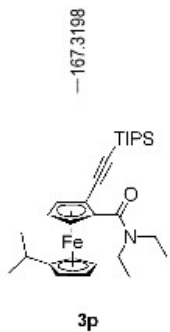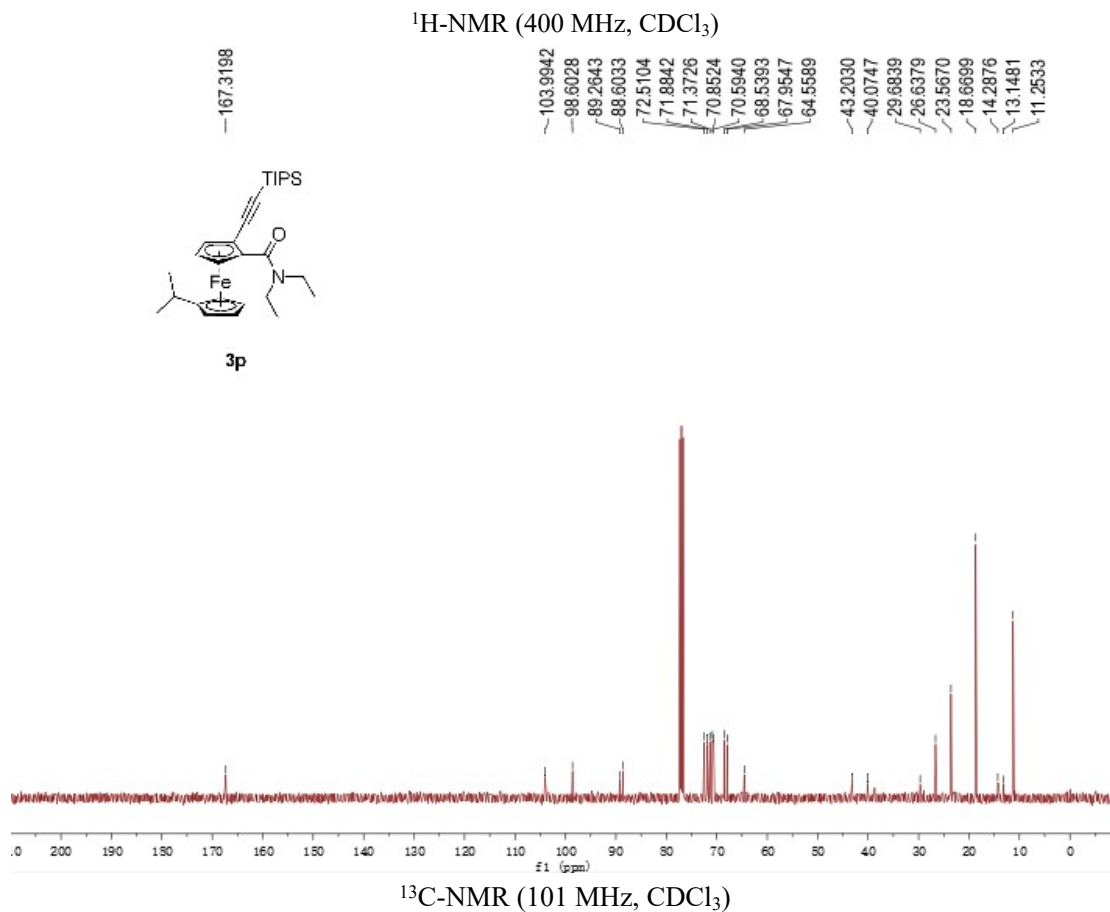

### 2-Triethylsilyylethynyl-(diethyl-1-carbonyl)ferrocene (4a):

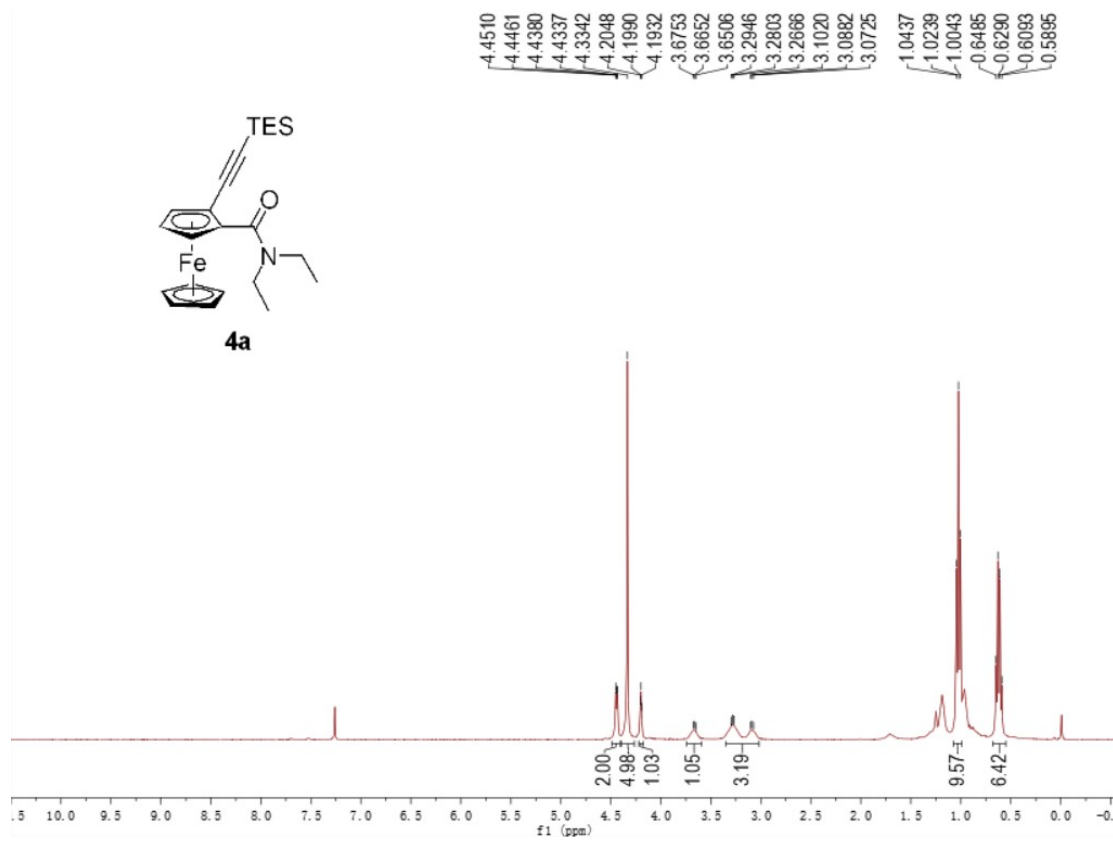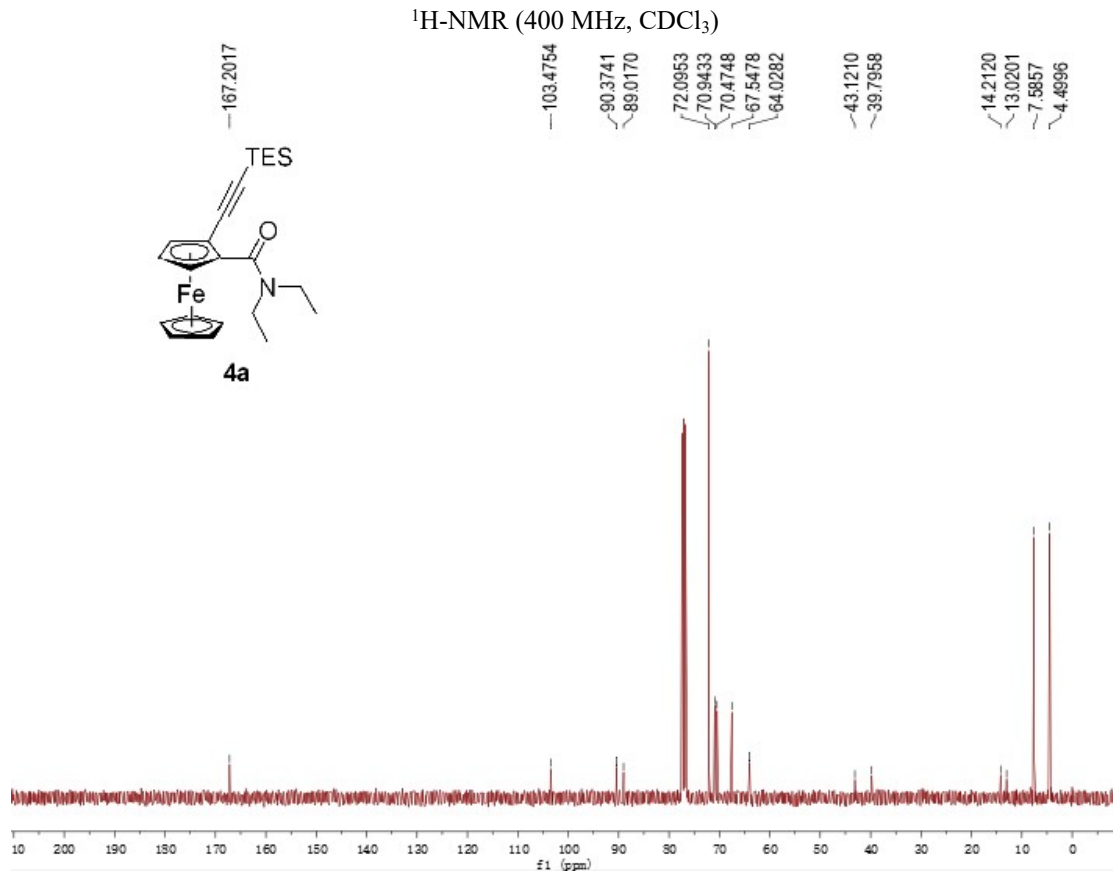

## 2-tert-butylsilyl ethynyl-(diethyl-1-carbonyl)ferrocene (4b):

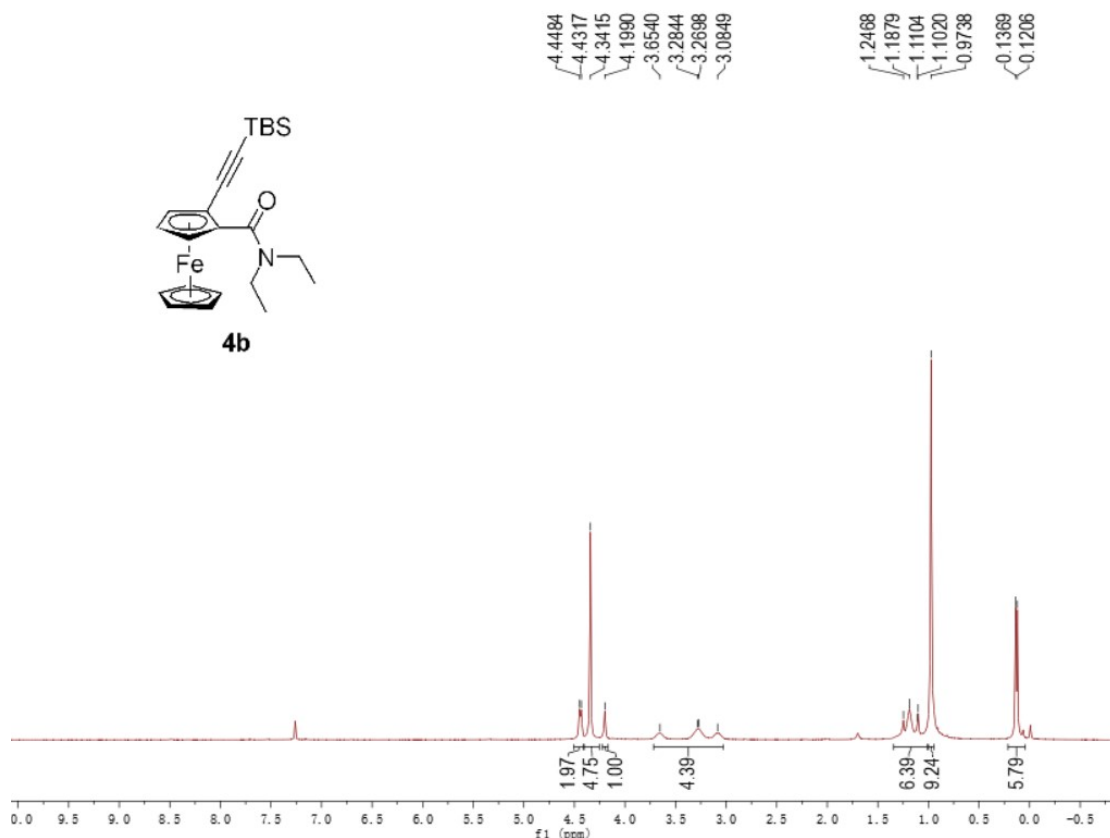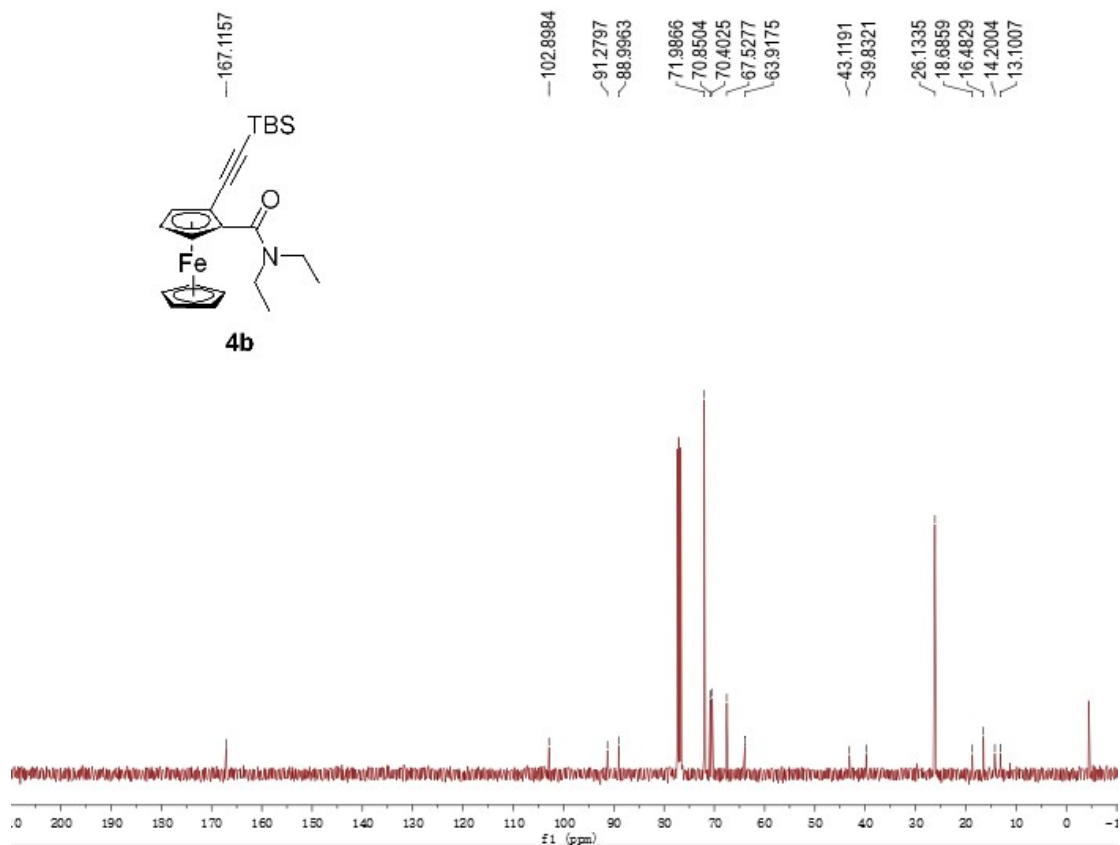



### 2-phenylethynyl-(diethyl-1-carbonyl)ferrocene (4c):

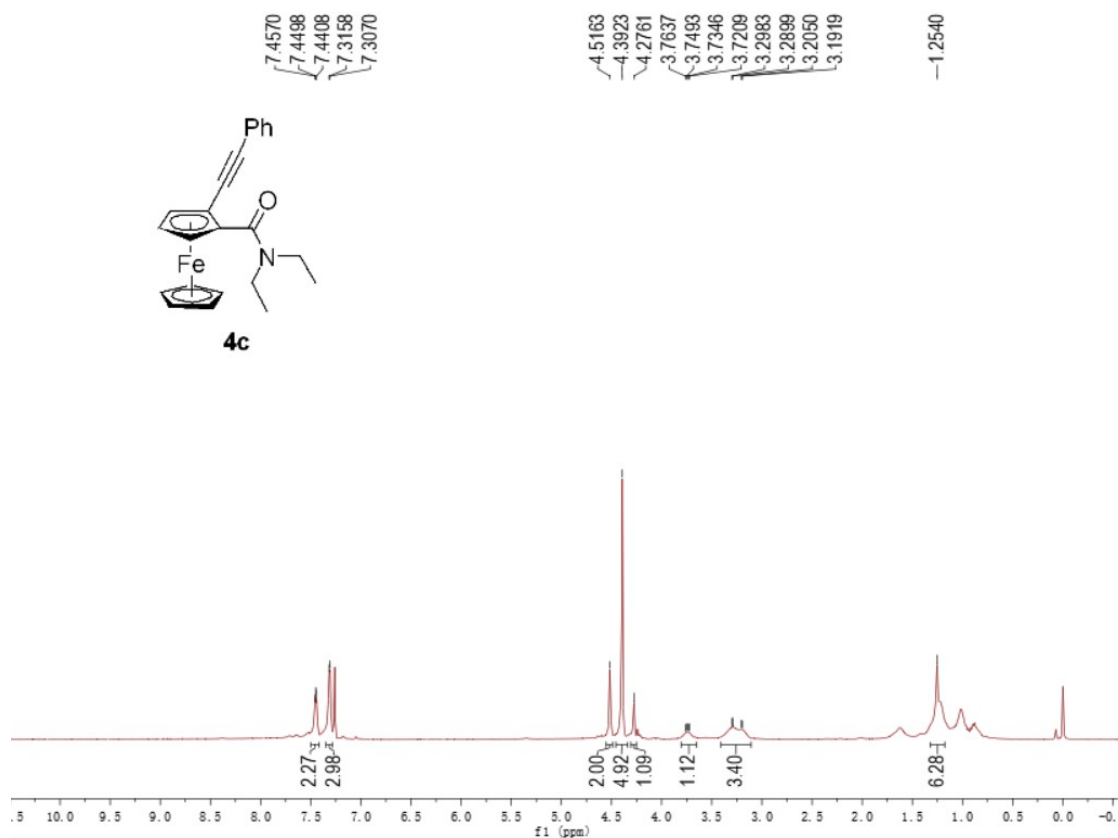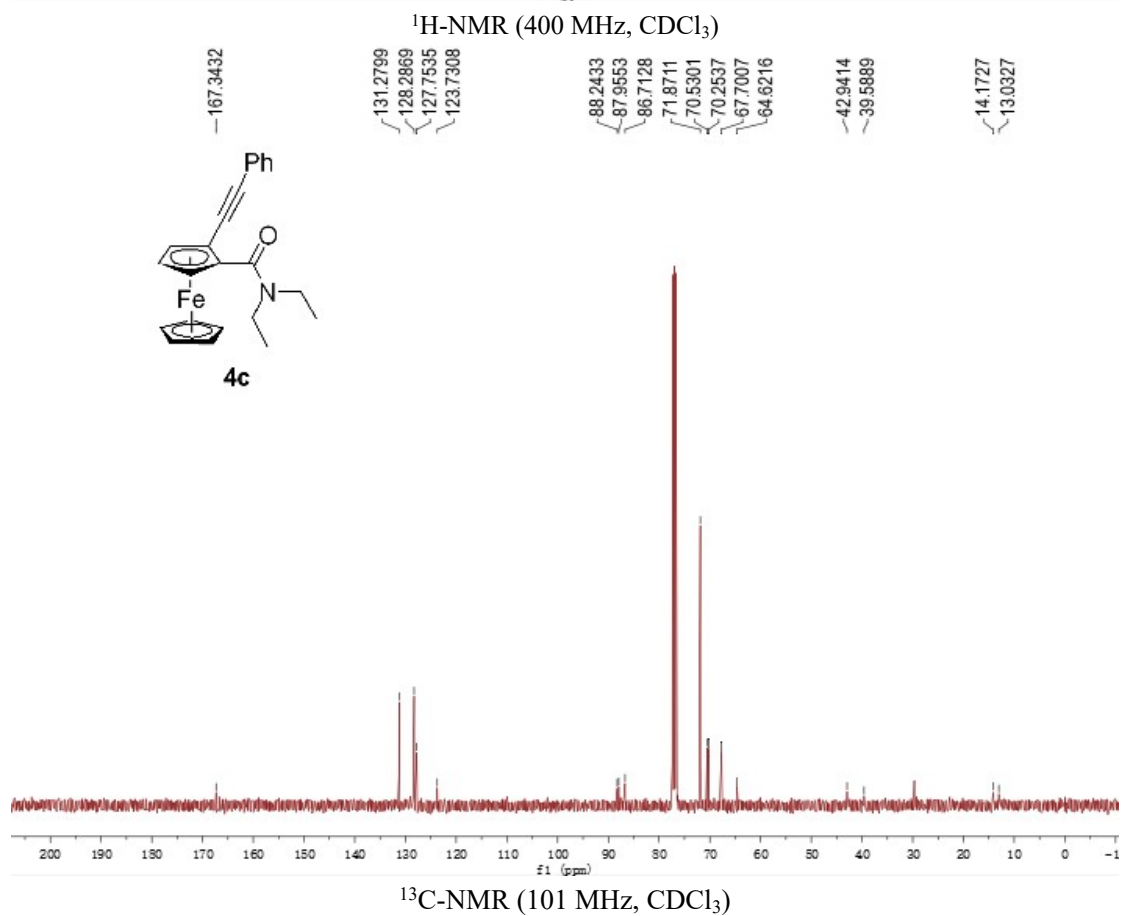

## 2-(2-chlorophenyl)ethynyl-(diethyl-1-carbonyl)ferrocene (4d):

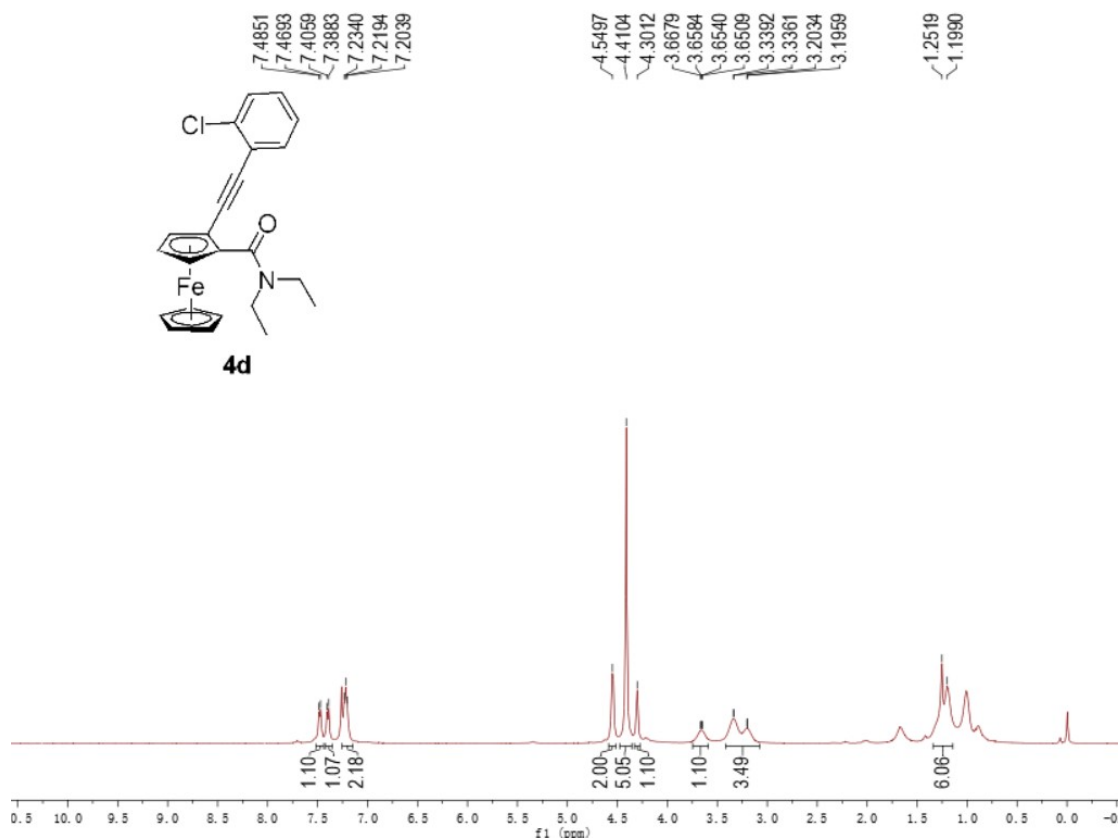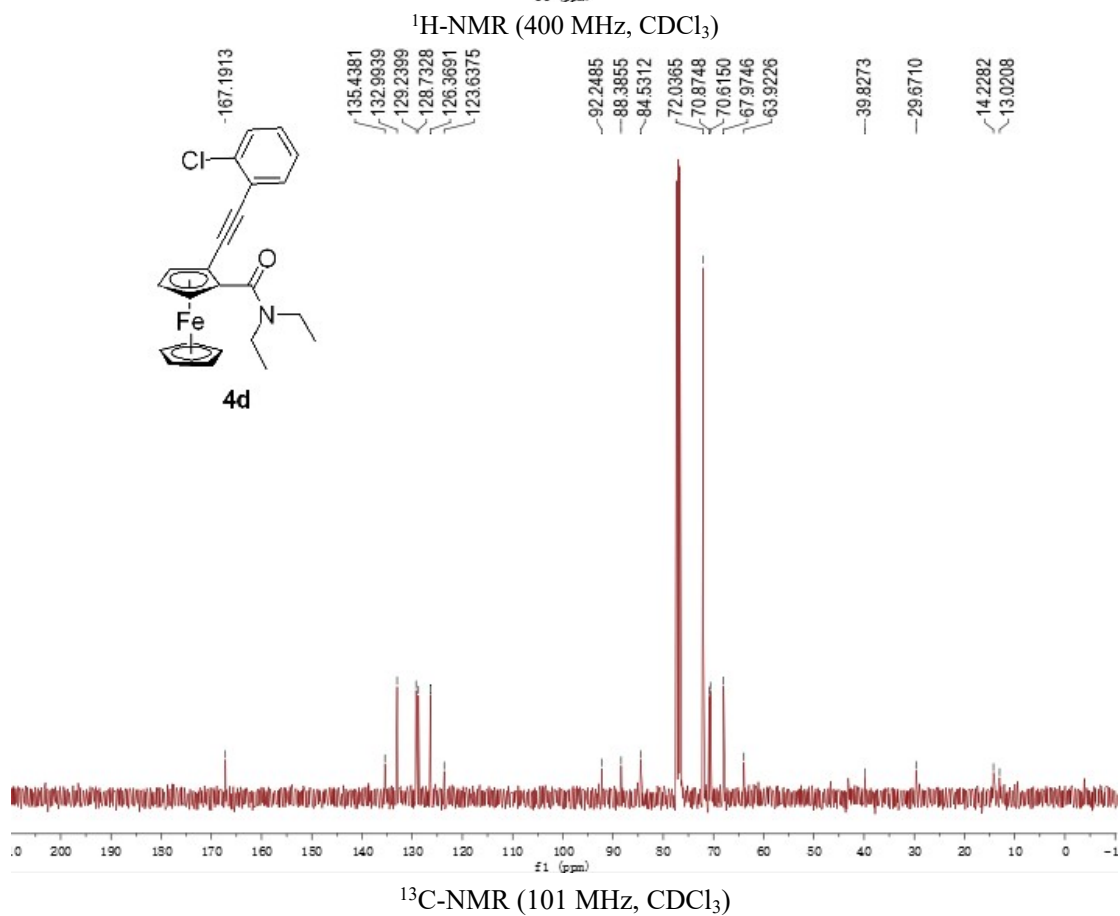

**2-(m-tolylethynyl)ethynyl-(diethyl-1-carbonyl)ferrocene (4e):**

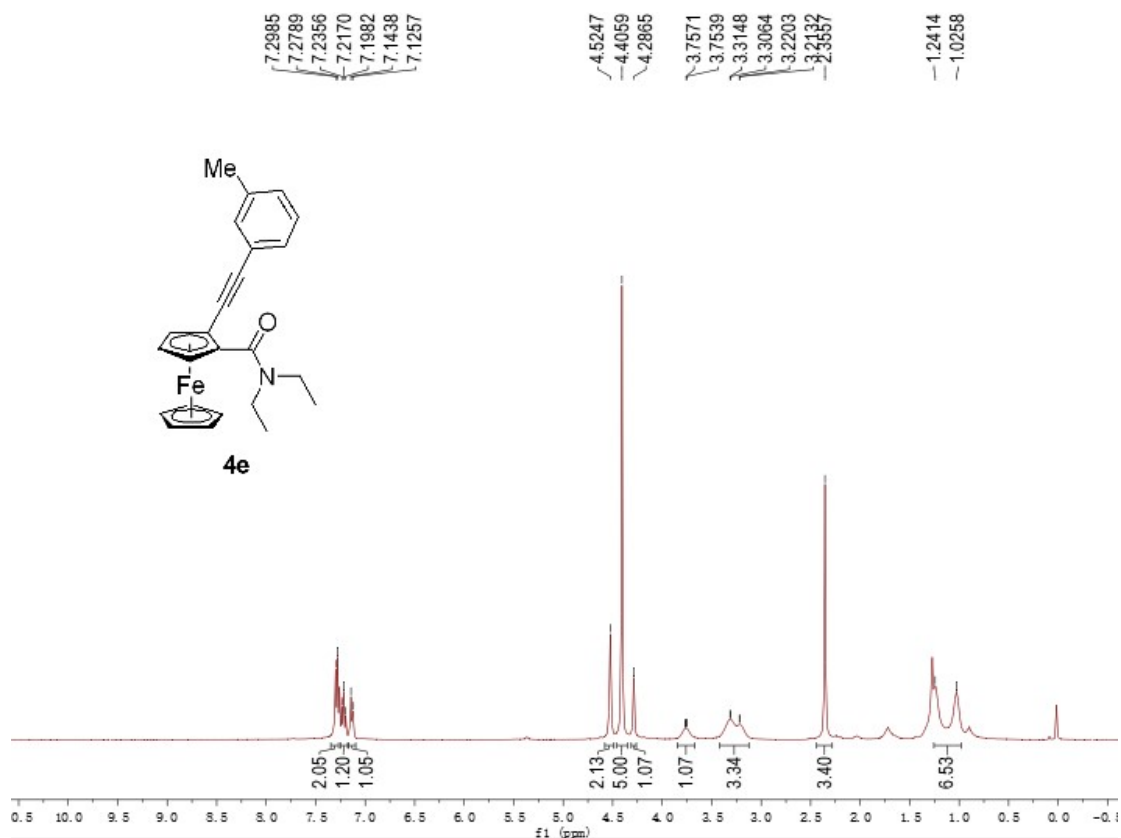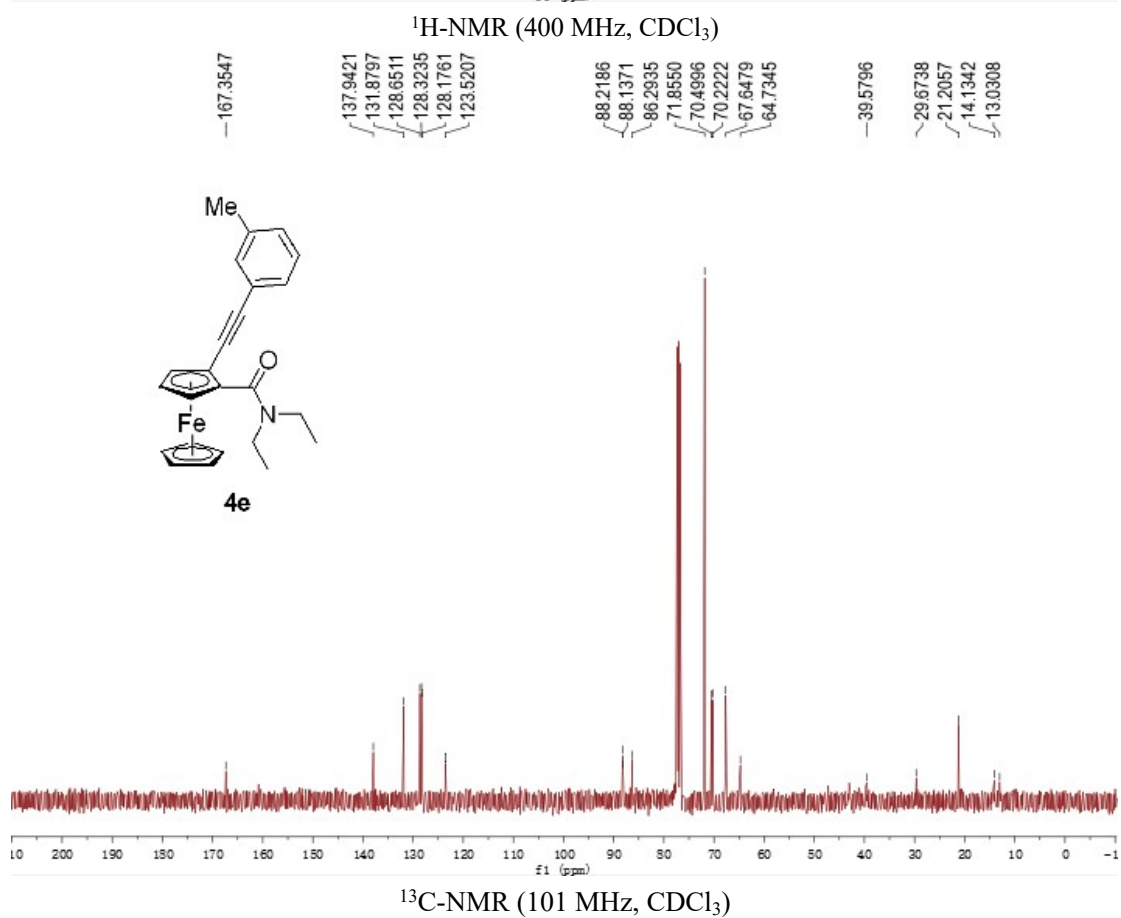

**2-(3-methoxyphenyl)ethynyl-(diethyl-1-carbonyl)ferrocene (4f):**

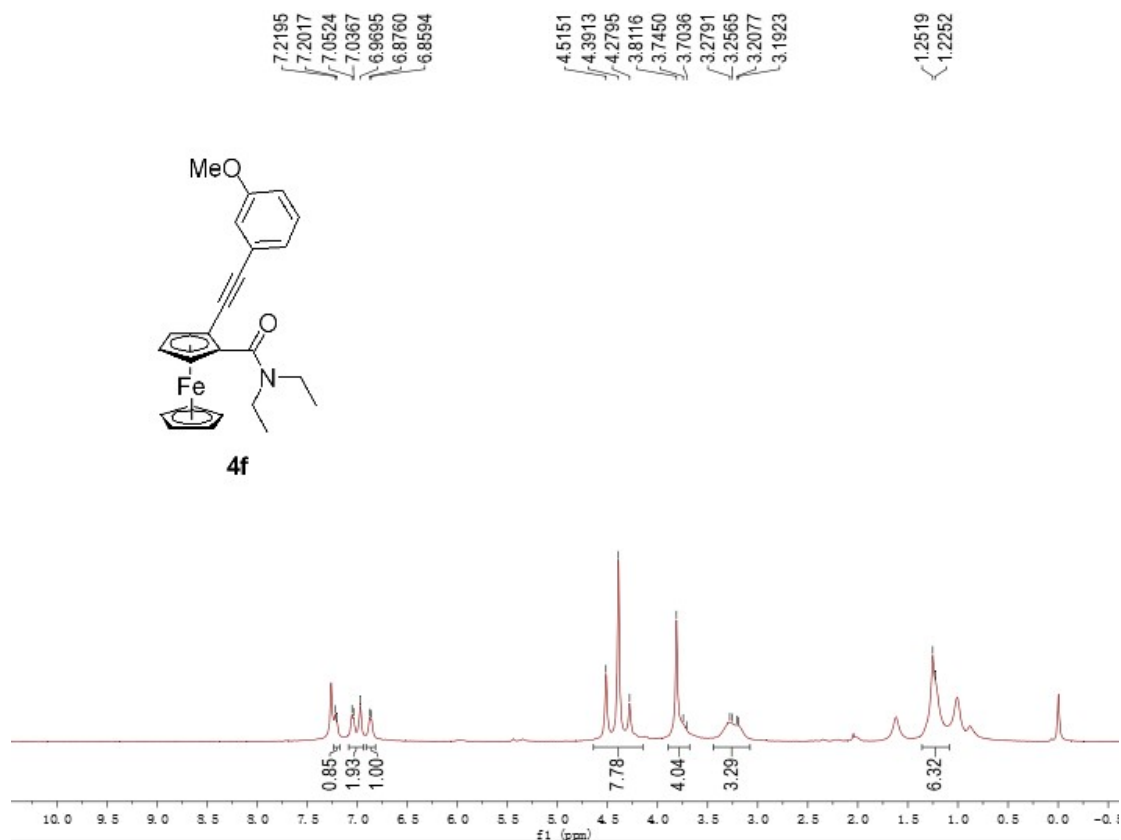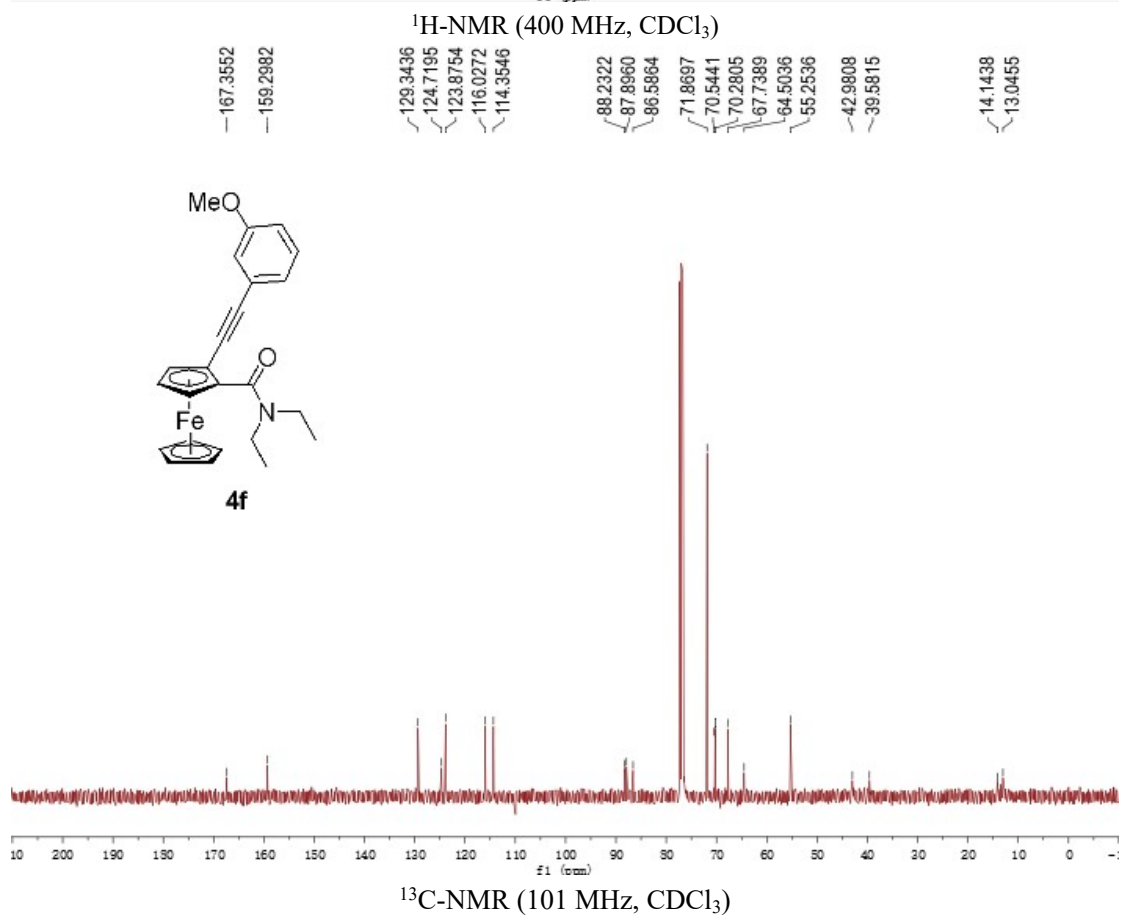

## 2-(4-chlorophenyl)ethynyl-(diethyl-1-carbonyl)ferrocene (4g):

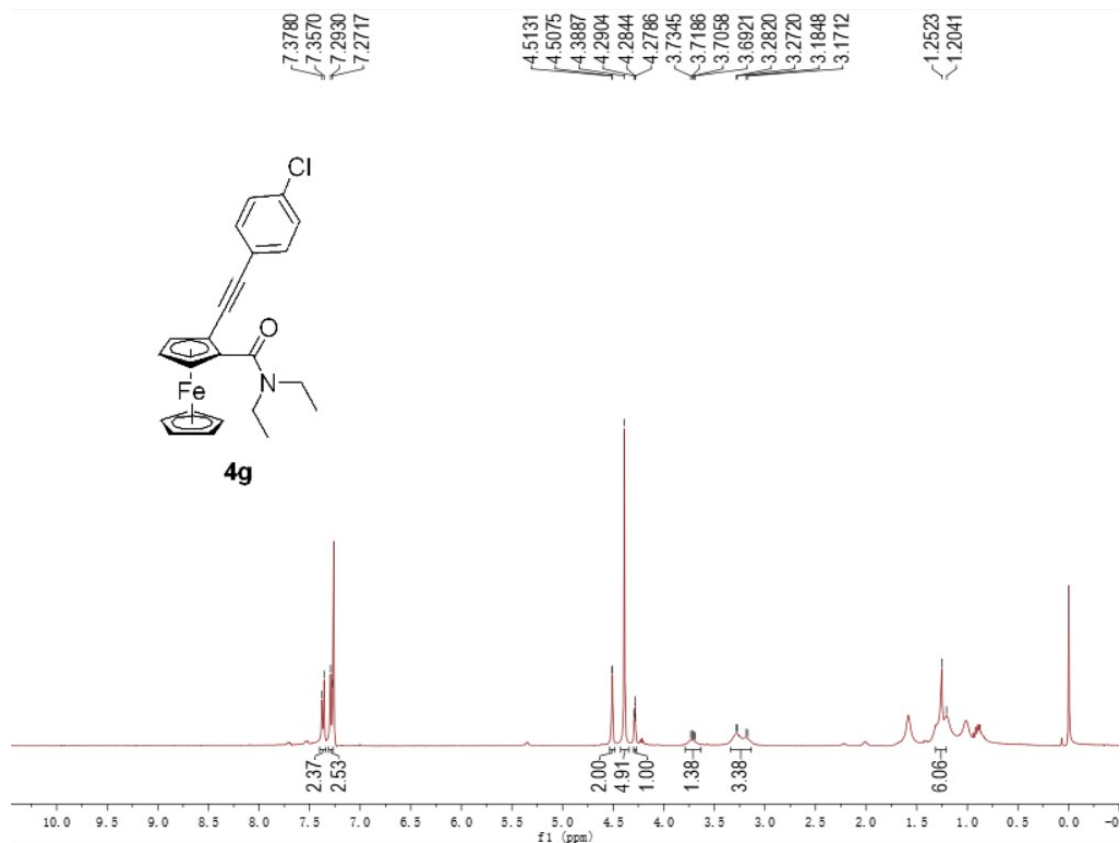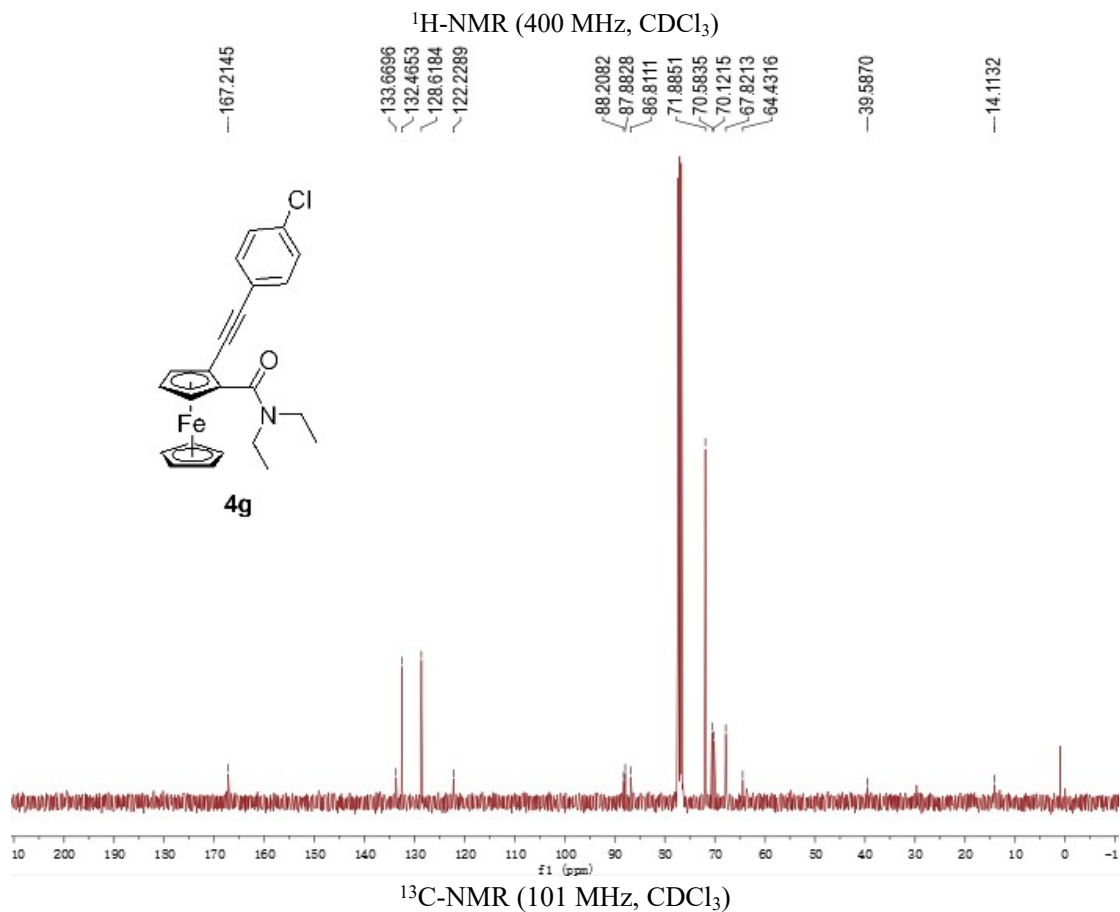

## 2-(4-bromophenyl)ethynyl-(diethyl-1-carbonyl)ferrocene (4h):

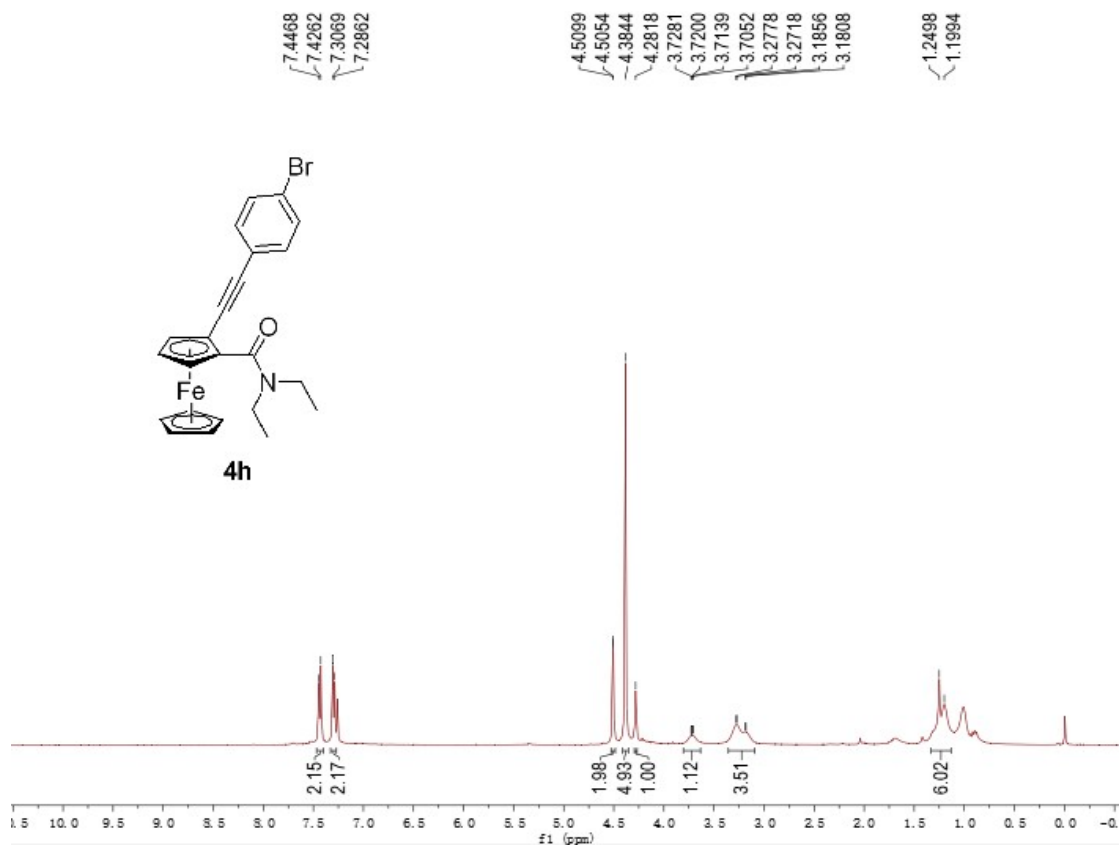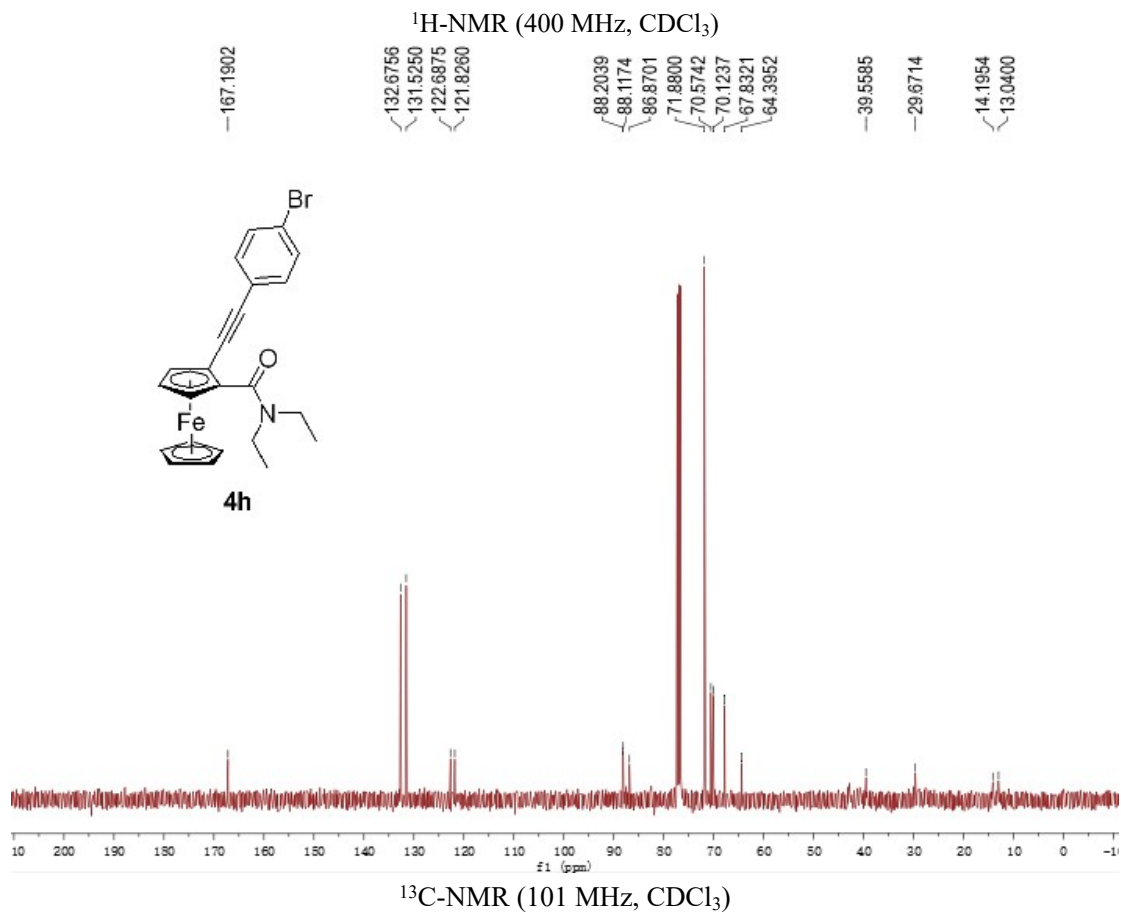

## 2-(4-cyanophenyl)ethynyl-(diethyl-1-carbonyl)ferrocene (**4i**):

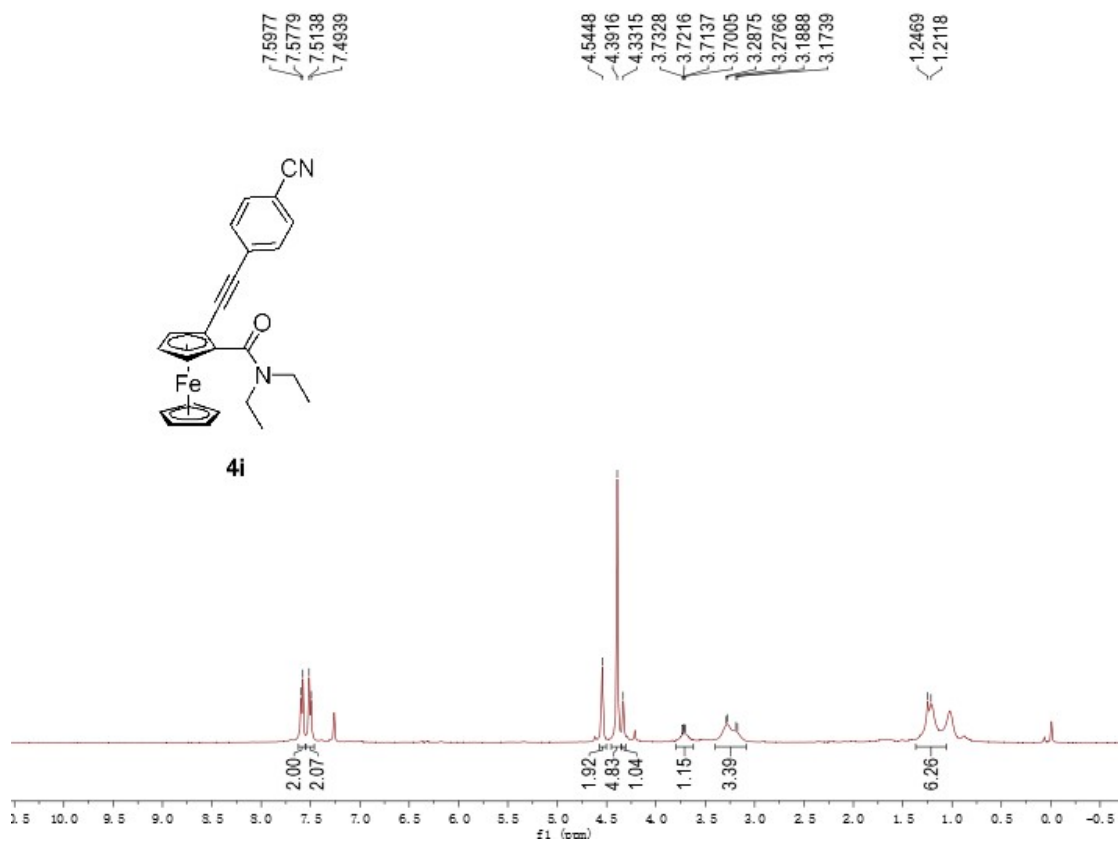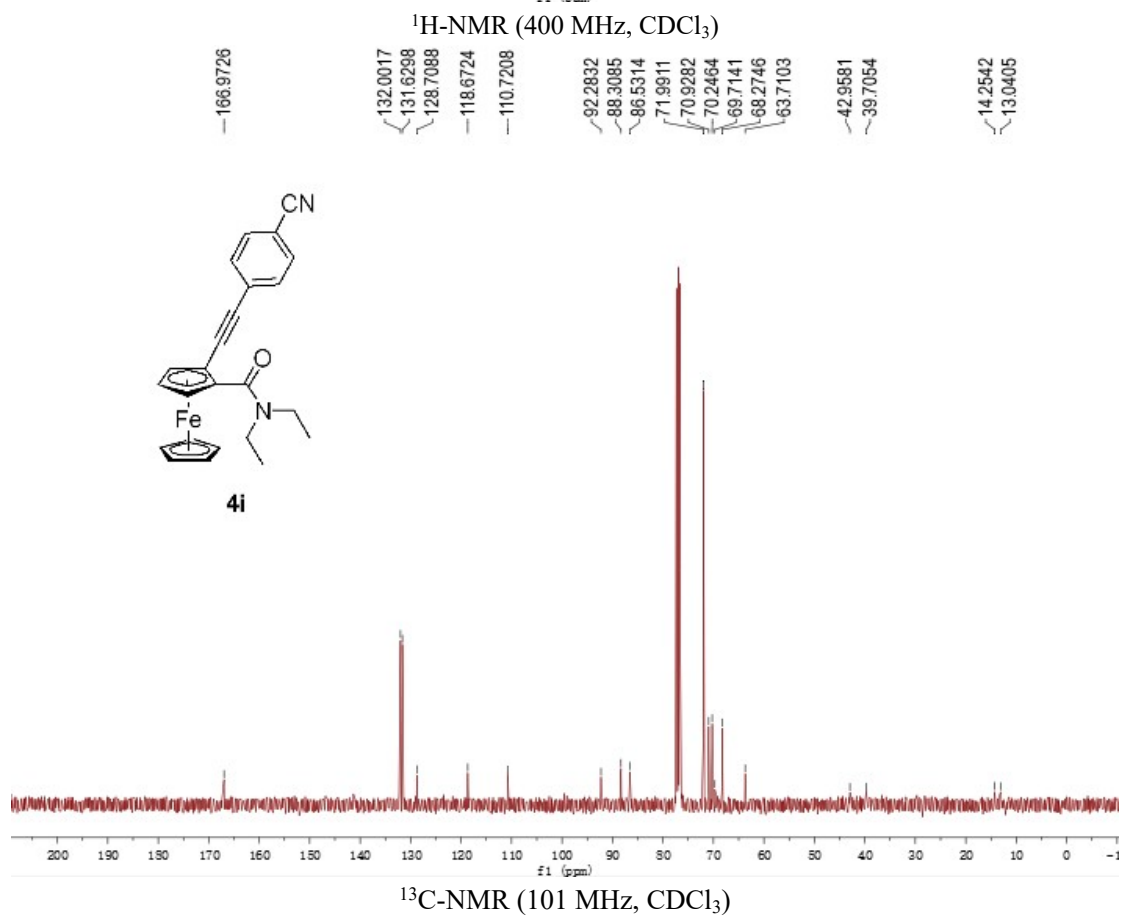

**2-(4-nitrophenyl)ethynyl-(diethyl-1-carbonyl)ferrocene (4j):**

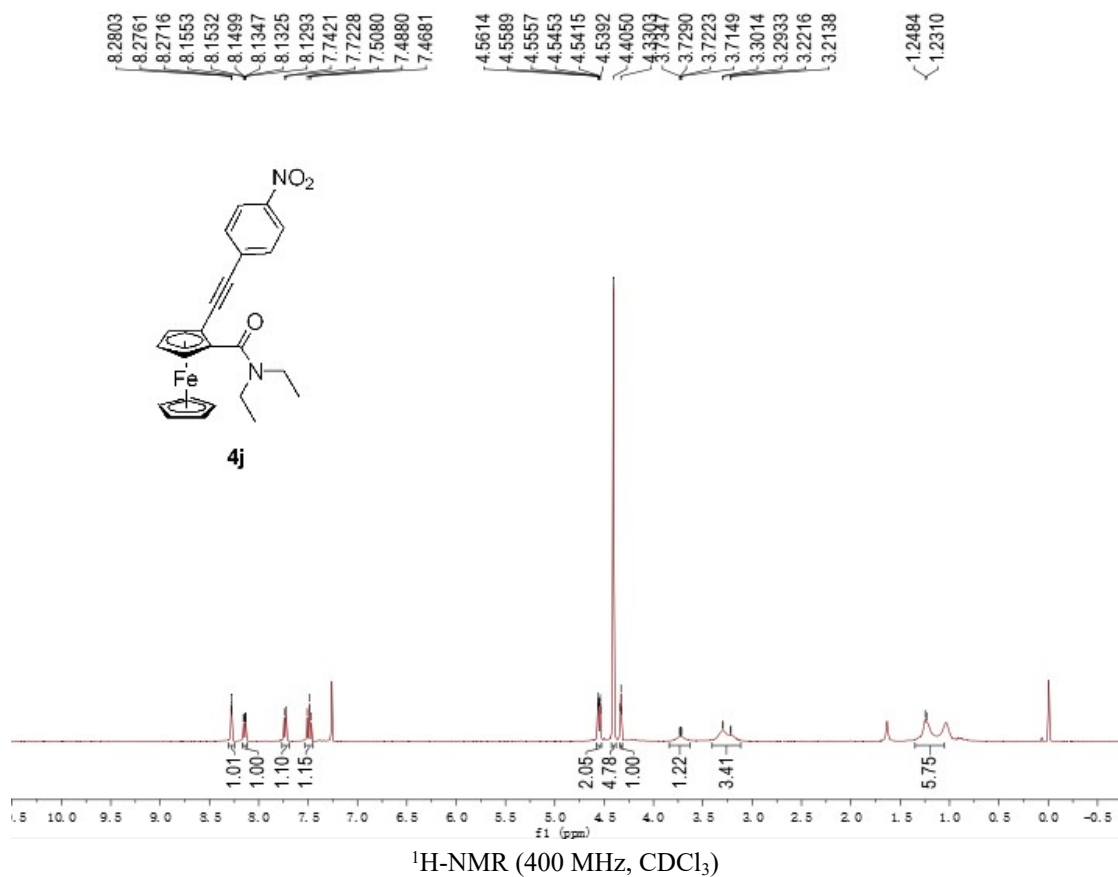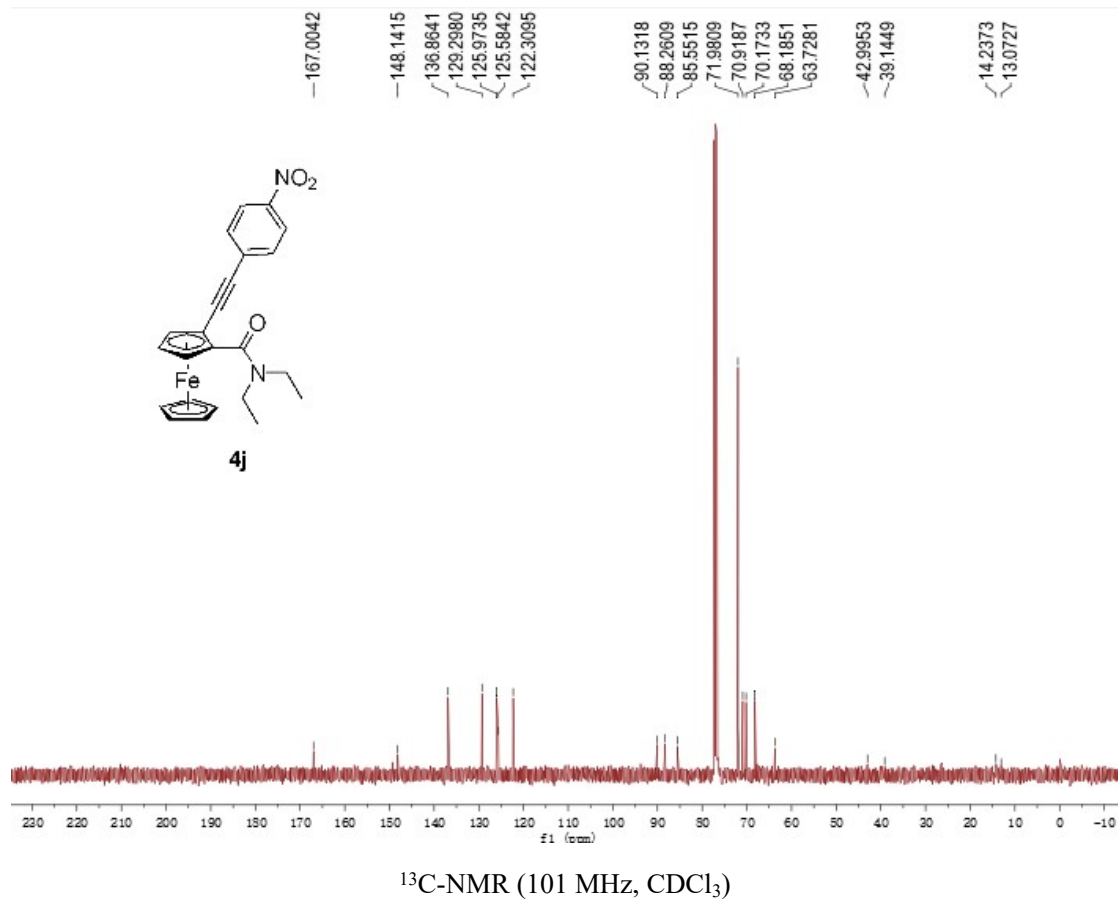



### 2-(4-formylphenyl)ethynyl-(diethyl-1-carbonyl)ferrocene (4k):

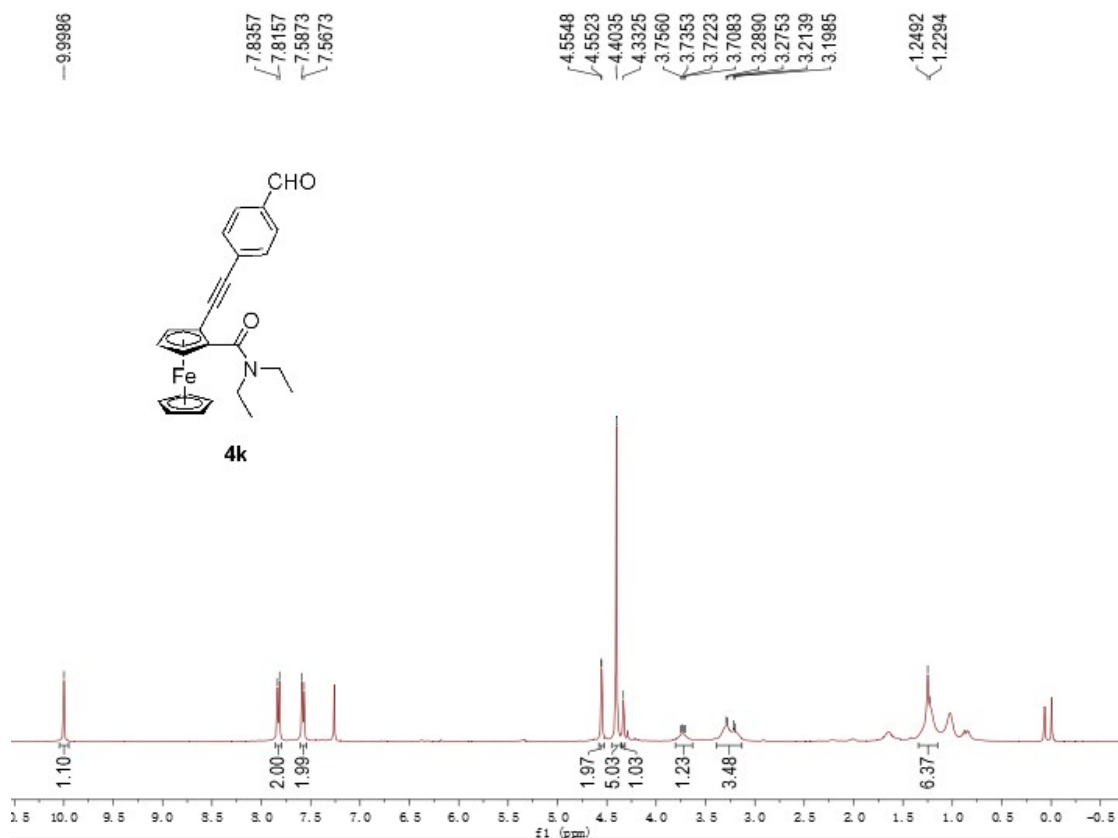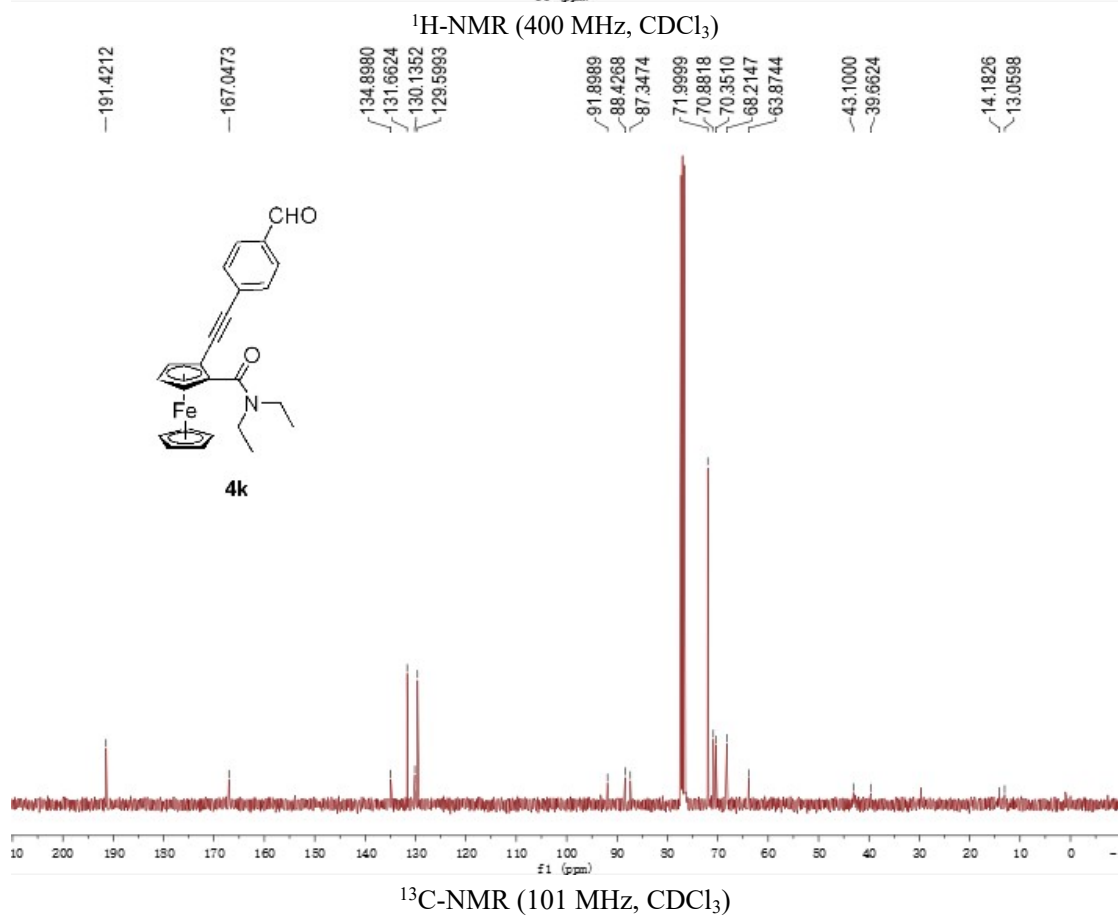

## 2-(4-acetylphenyl)ethynyl-(diethyl-1-carbonyl)ferrocene (**4**):

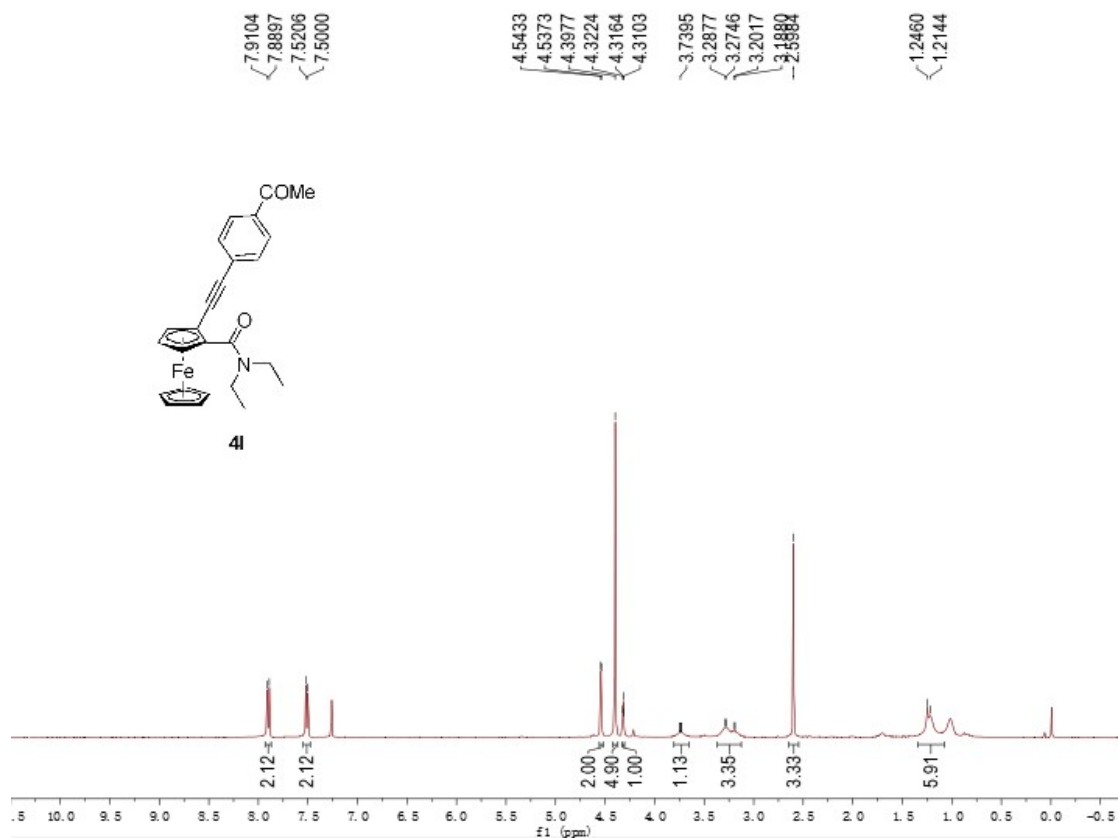

<sup>1</sup>H-NMR (400 MHz, CDCl<sub>3</sub>)

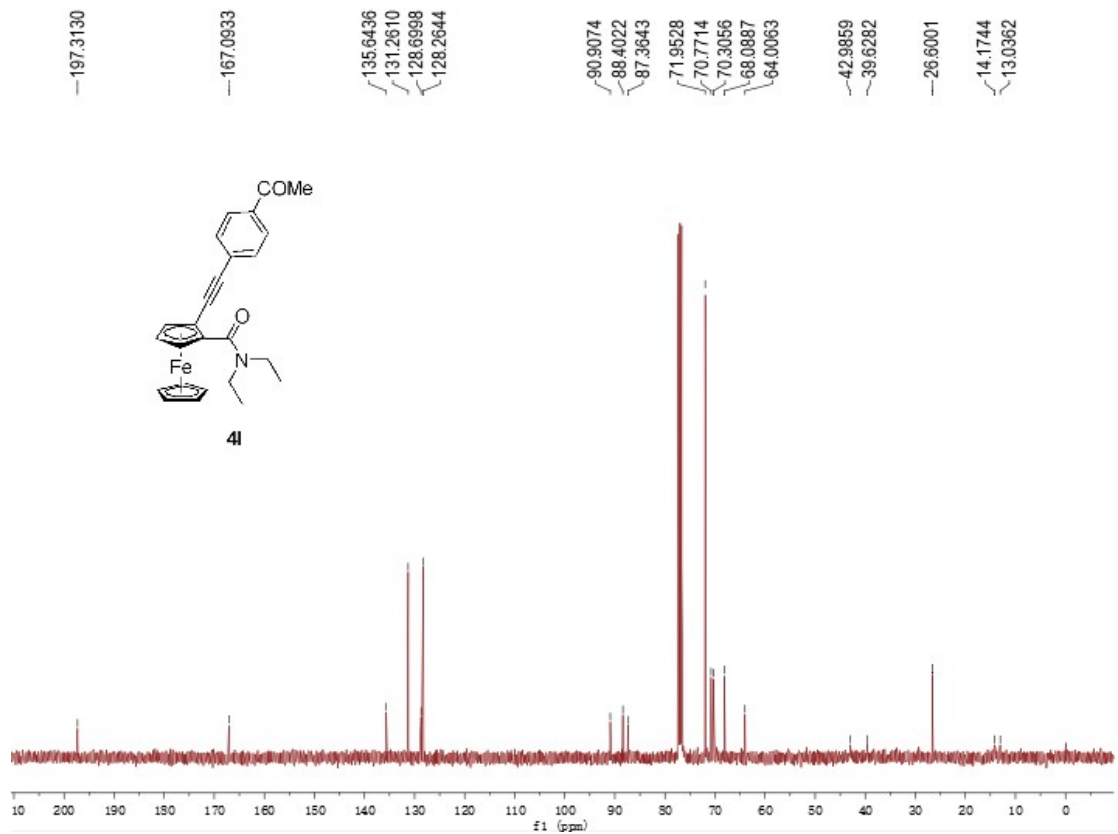

<sup>13</sup>C-NMR (101 MHz, CDCl<sub>3</sub>)

## 2-(4-methyl benzoate)ethynyl-(diethyl-1-carbonyl)ferrocene (4m):

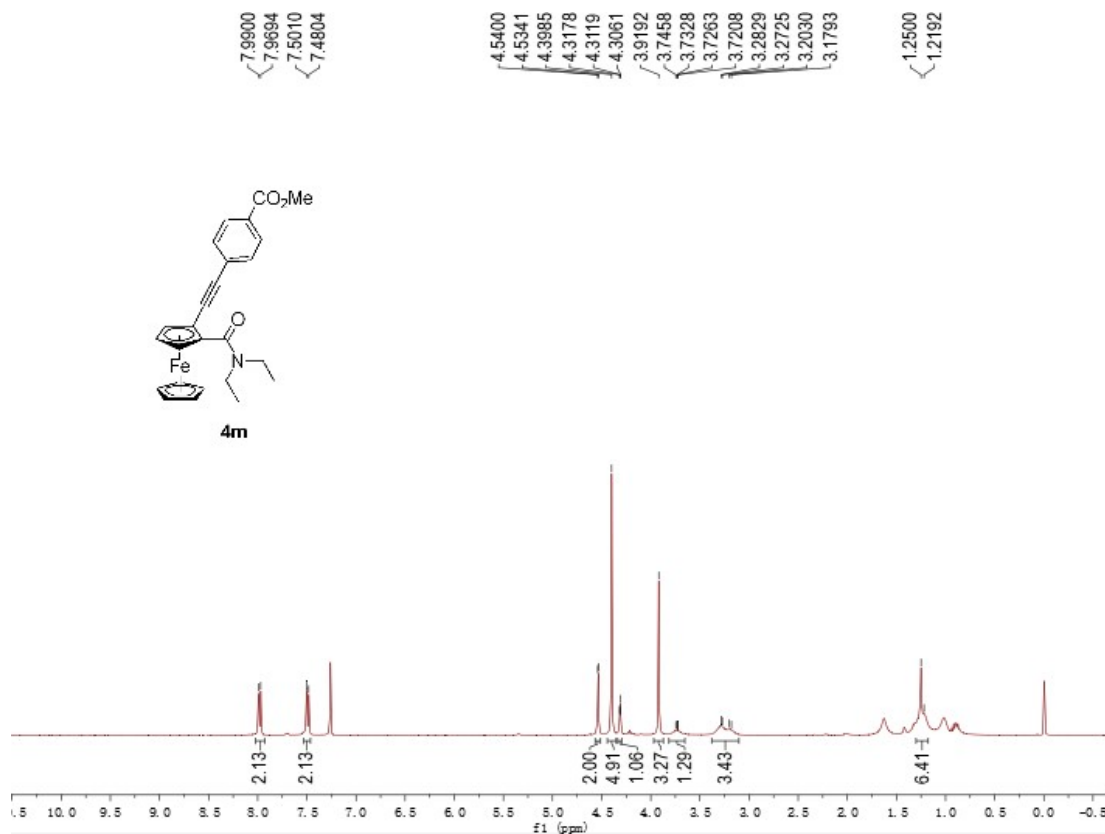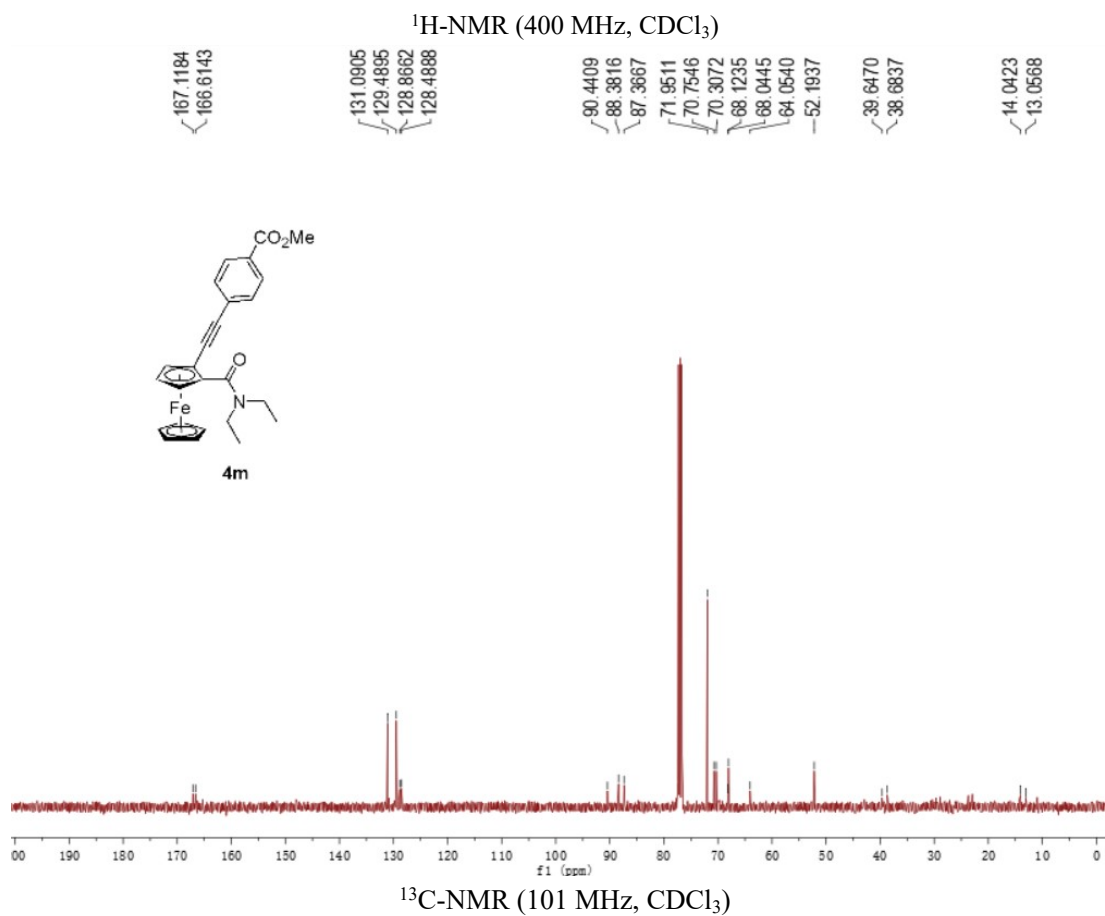

## 2-(naphthalen-2-ylethynyl)-(diethyl-1-carbonyl)ferrocene (4n):

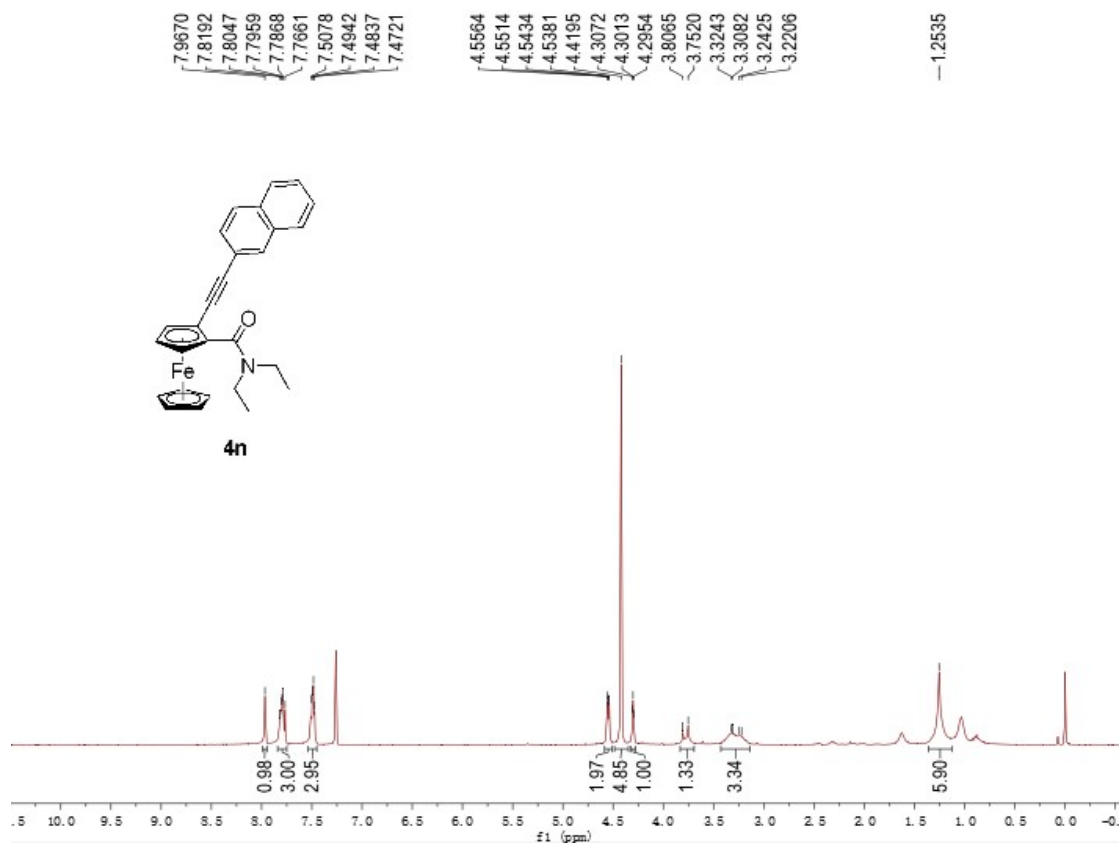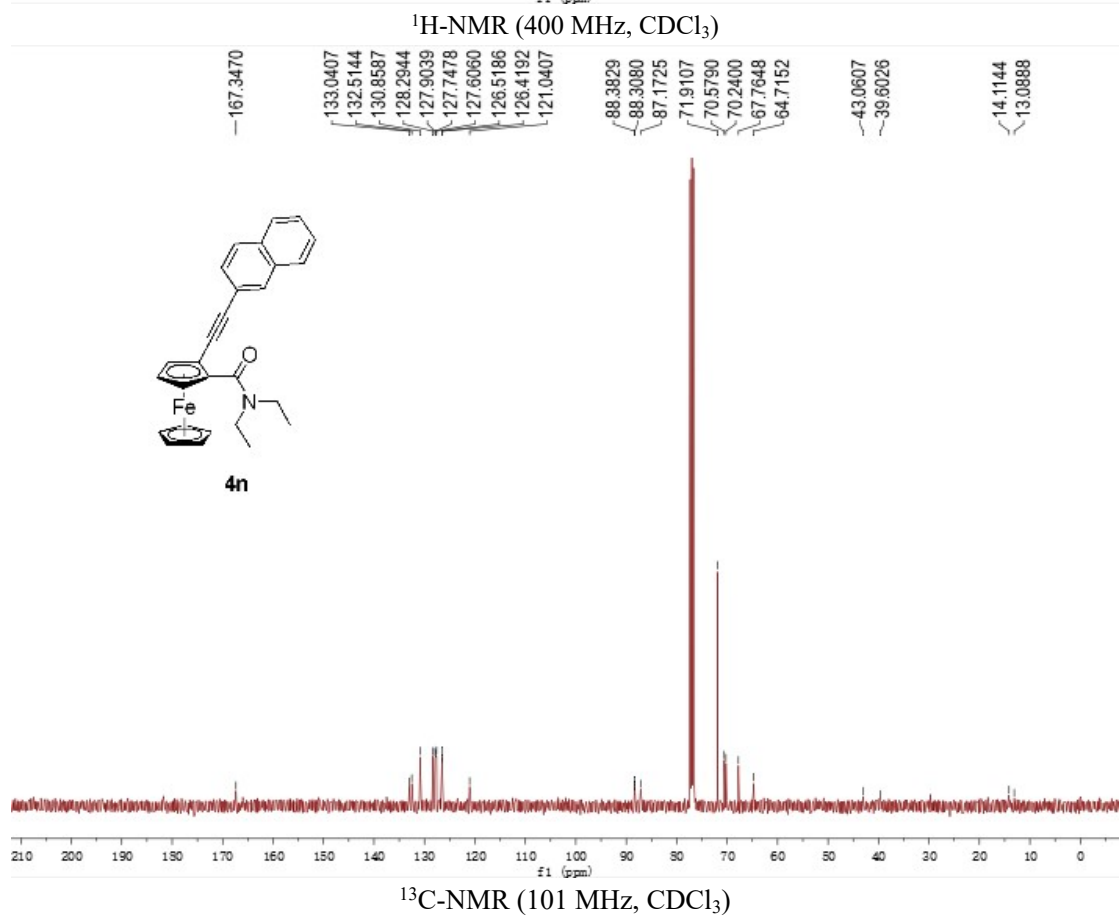

**2-((1-((tert-butyldimethylsilyloxy)cyclohexyl)ethynyl)-(diethyl-1-carbonyl)ferrocene (4o):**

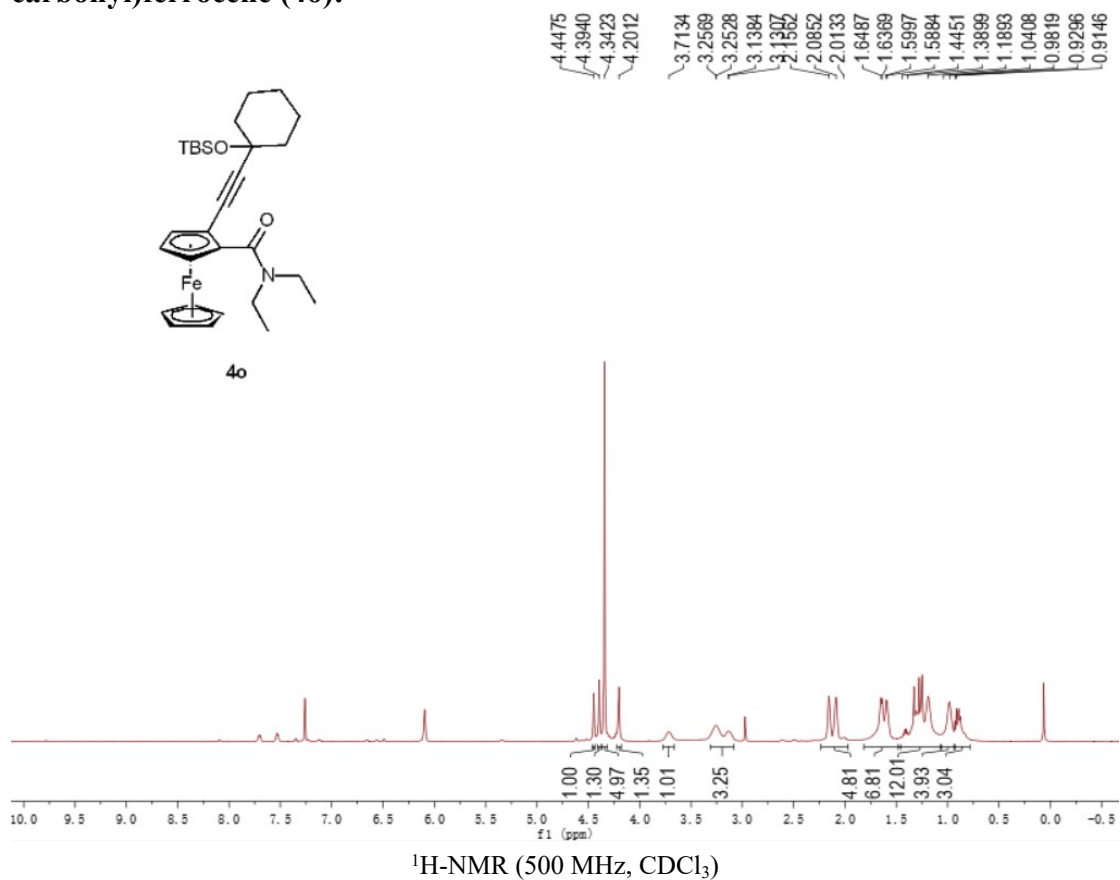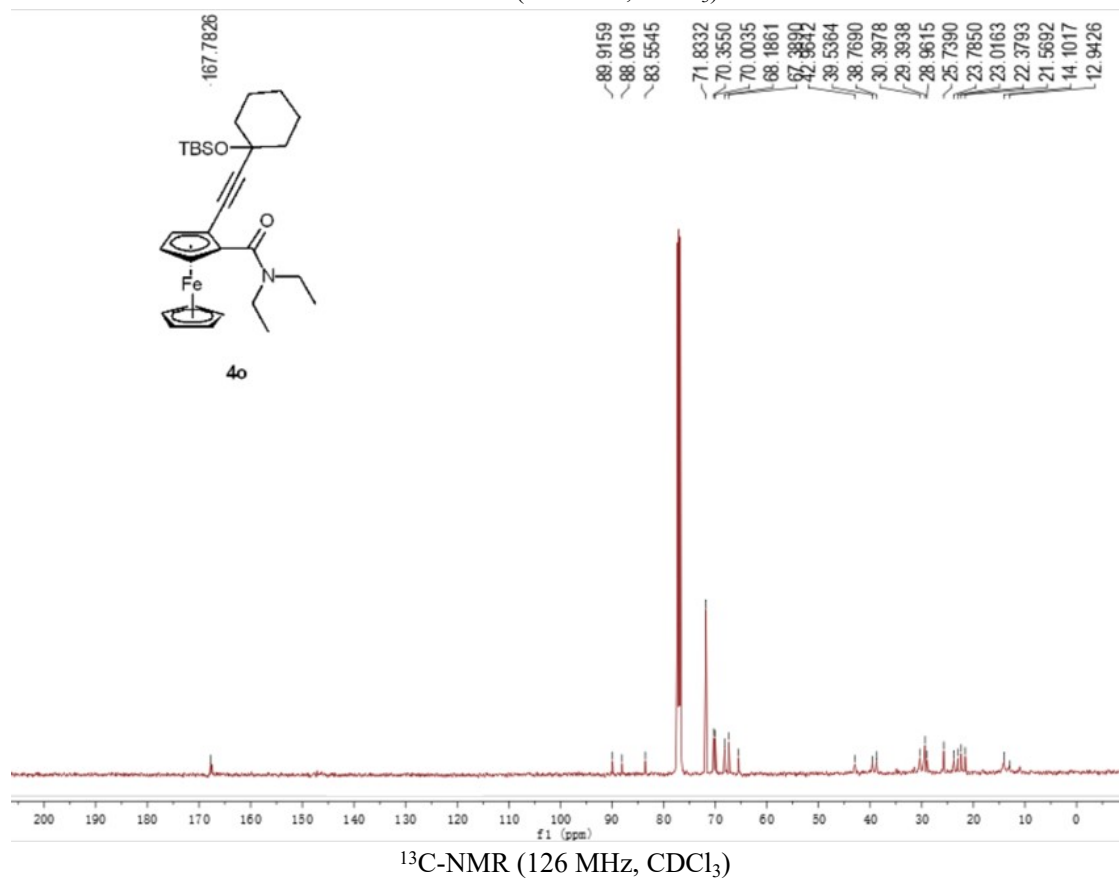

## 2-Ethynyl-(diethyl-1-carbonyl)ferrocene (5):

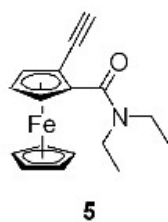

4.4786  
4.4306  
4.3533  
4.2208  
3.6236  
3.6212  
3.6160  
3.6125  
3.3272  
3.2532  
3.2448  
3.1926  
2.8134  
1.1805  
1.0117

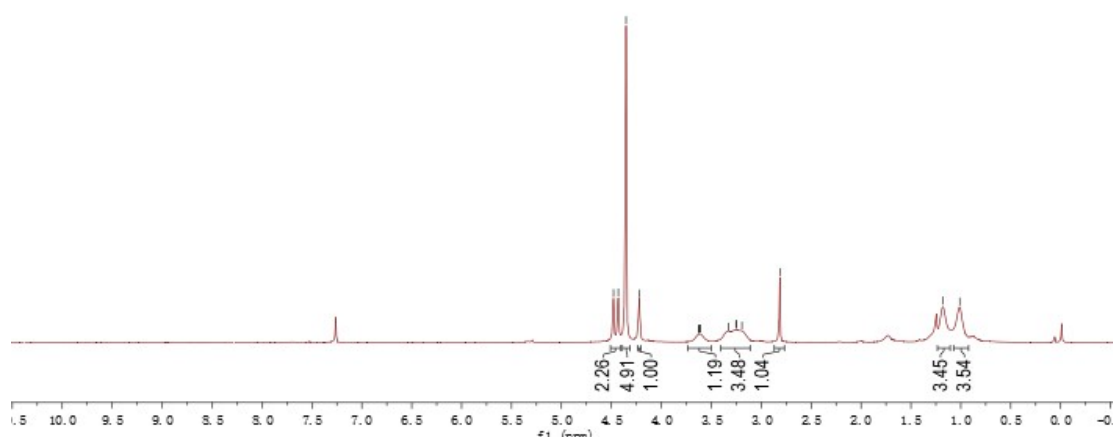

<sup>1</sup>H-NMR (400 MHz, CDCl<sub>3</sub>)

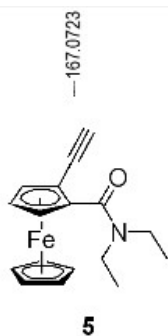

167.0723

88.0083  
80.7989  
75.8557  
71.9283  
71.1929  
69.5521  
67.5797  
63.9924  
42.9004  
39.5897  
14.2203  
12.9040

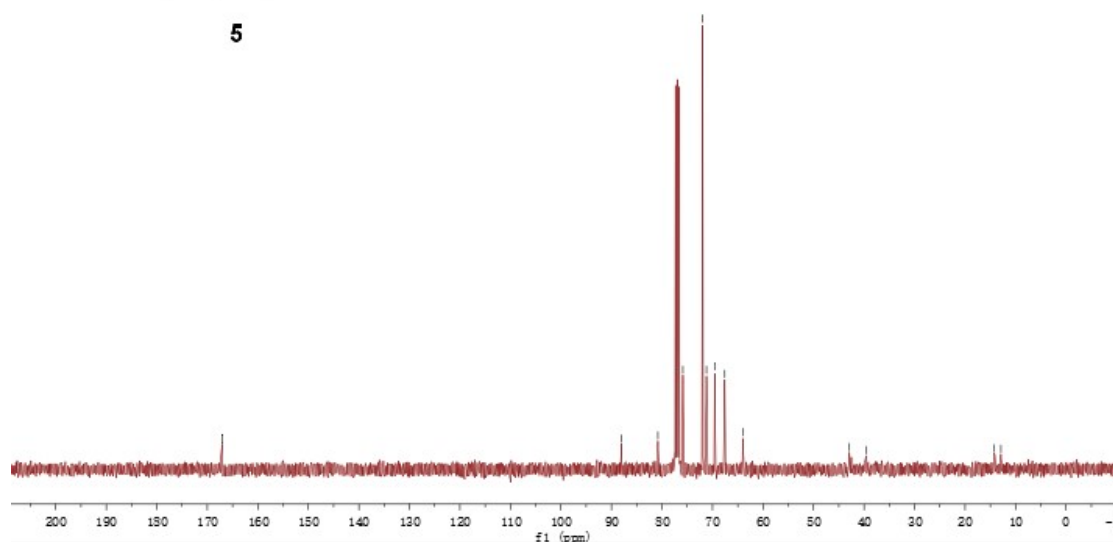

<sup>13</sup>C-NMR (101 MHz, CDCl<sub>3</sub>)

### 2-vinyl-(diethyl-1-carbonyl)ferrocene (6):

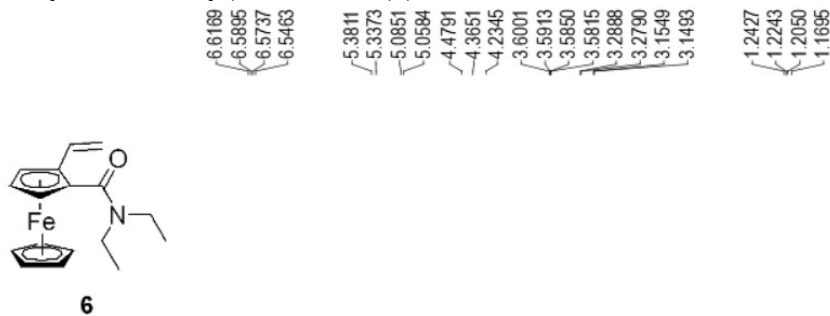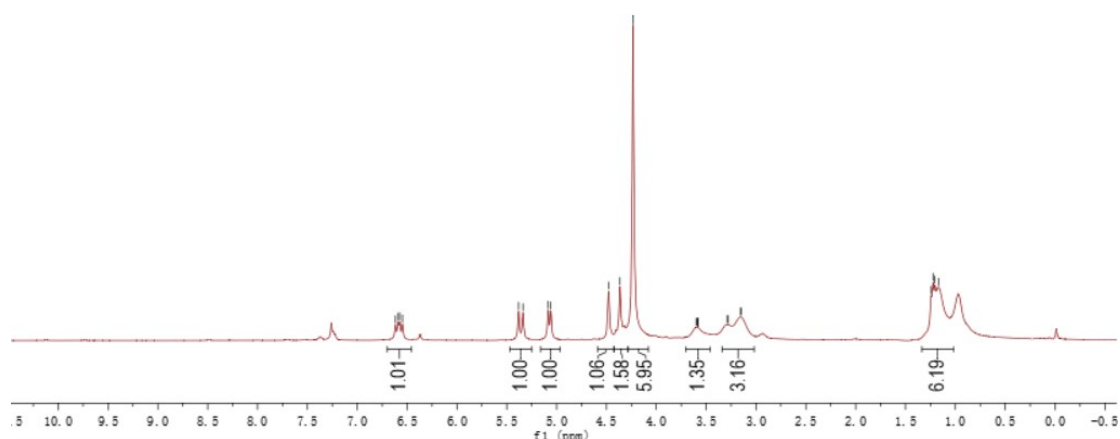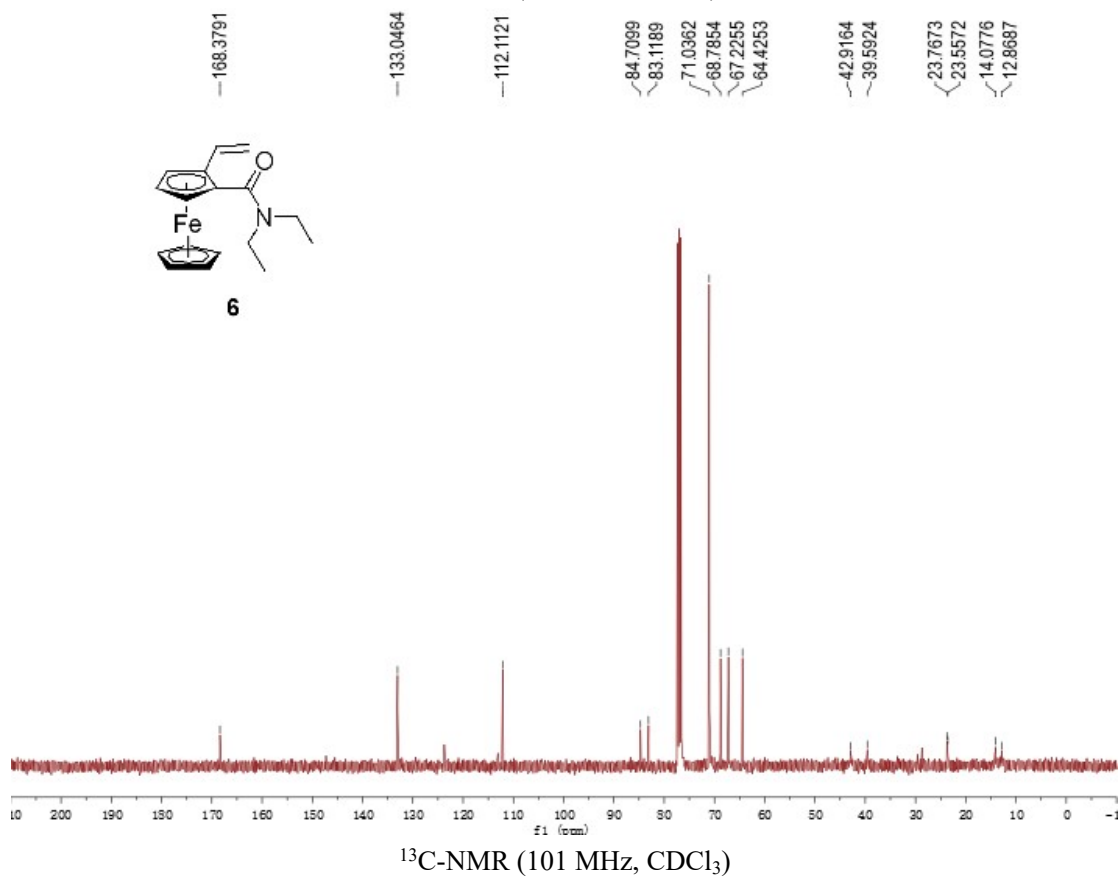

## 2-(1-phenyl-1H-1,2,3-triazol-5-yl)-(diethyl-1-carbonyl)ferrocene (7):

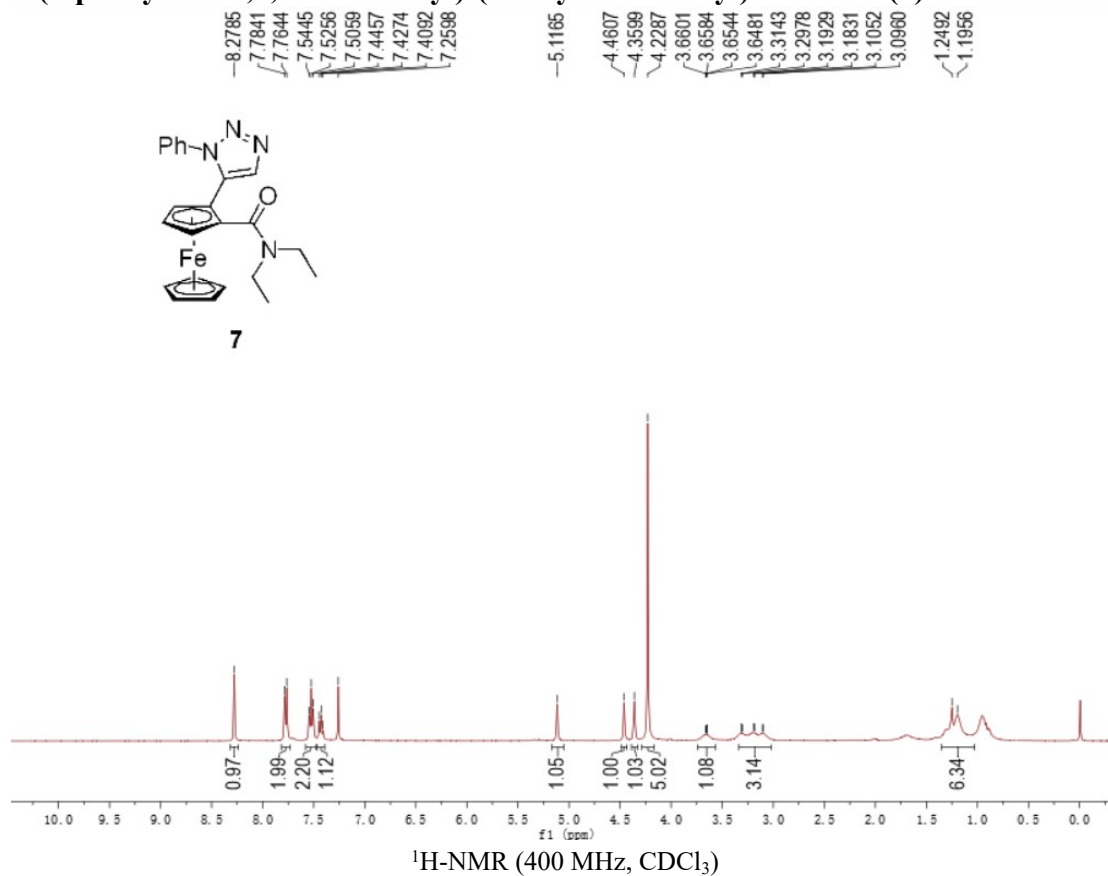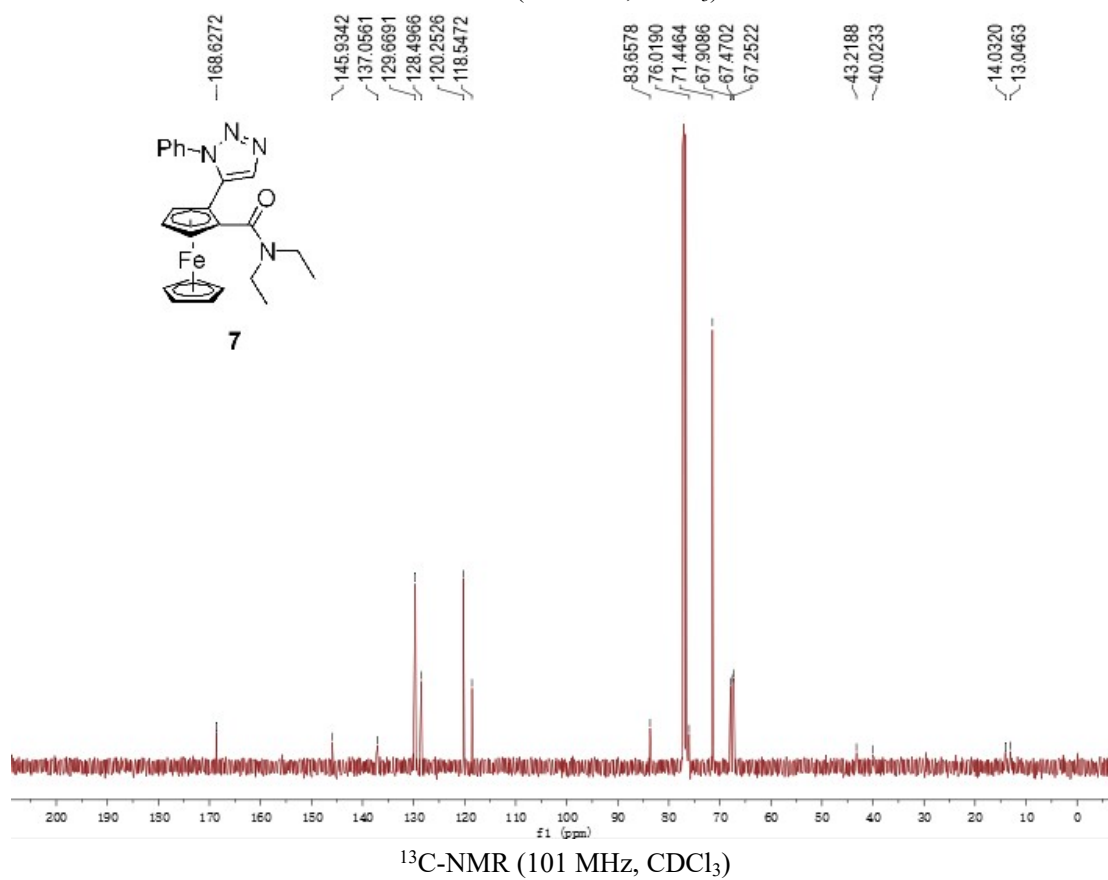



## 2-(4-methyl benzoate)ethynyl-(diethyl-1-carbonyl)ferrocene (8):

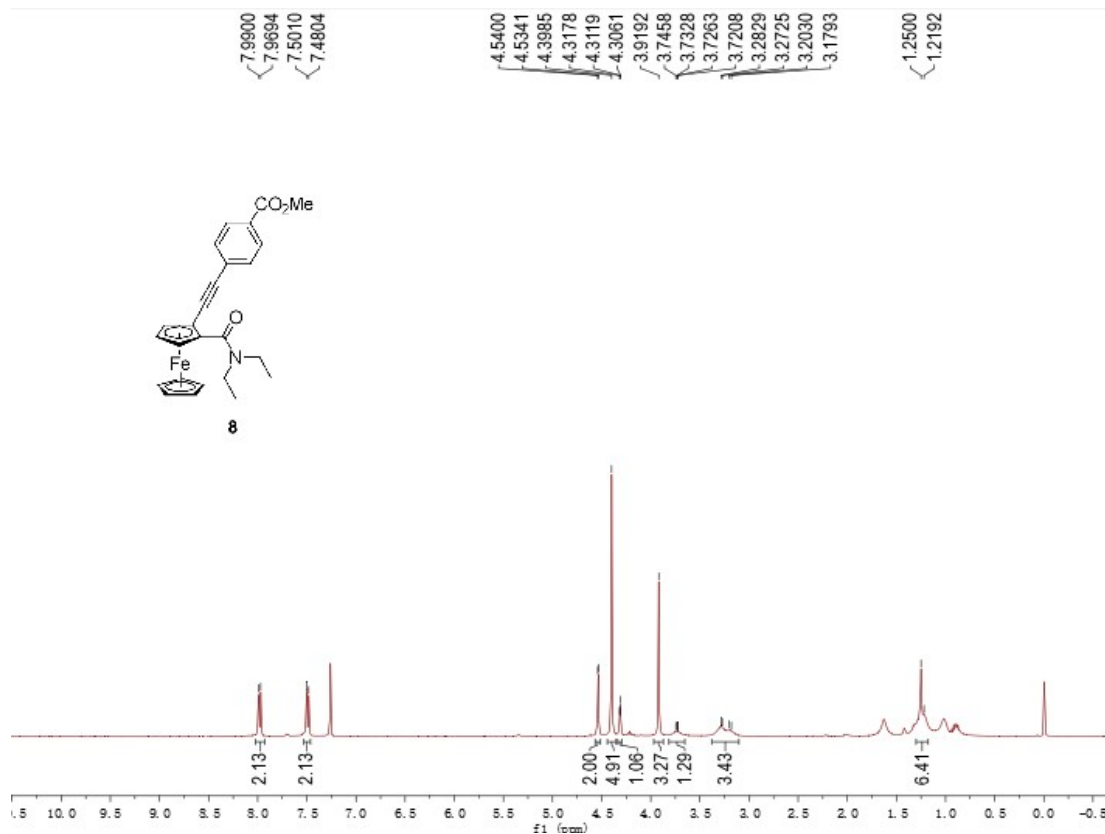

<sup>1</sup>H-NMR (400 MHz, CDCl<sub>3</sub>)

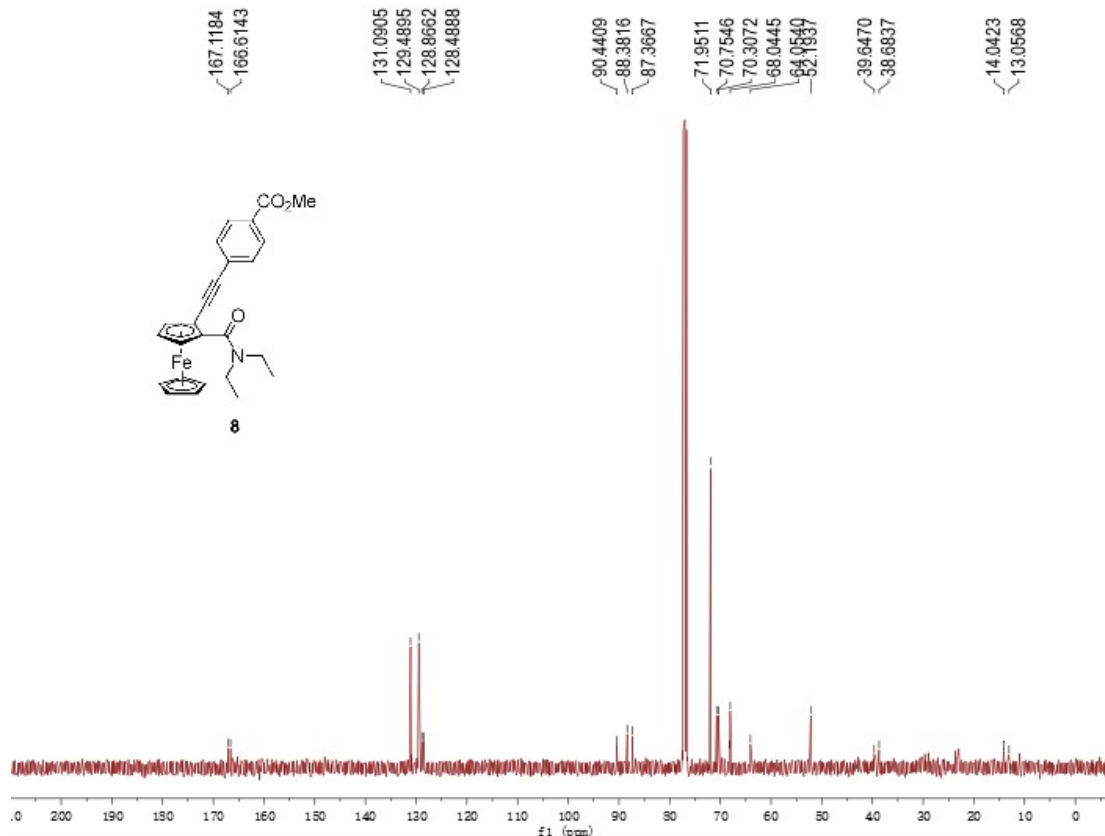

<sup>13</sup>C-NMR (101 MHz, CDCl<sub>3</sub>)
